# Supplementary material for: Protocol for a single-centre prospective observational study of postoperative delirium following total joint arthroplasties among South East Asians
Source: PubMed Central journal article supplement — BMJ Open. 2018 Mar 6;8(3):e019426. doi: 10.1136/bmjopen-2017-019426 (PMC5855196; doi:10.1136/bmjopen-2017-019426), 2018-03-06
Supplement: bmjopen-2017-019426.draft_revisions.pdf [file bmjopen-2017-019426.draft_revisions.pdf]

# BMJ Open

BMJ Open is committed to open peer review. As part of this commitment we make the peer review history of every article we publish publicly available.

When an article is published we post the peer reviewers' comments and the authors' responses online. We also post the versions of the paper that were used during peer review. These are the versions that the peer review comments apply to.

The versions of the paper that follow are the versions that were submitted during the peer review process. They are not the versions of record or the final published versions. They should not be cited or distributed as the published version of this manuscript.

BMJ Open is an open access journal and the full, final, typeset and author-corrected version of record of the manuscript is available on our site with no access controls, subscription charges or pay-per-view fees (<http://bmjopen.bmj.com>).

If you have any questions on BMJ Open's open peer review process please email [editorial.bmjopen@bmj.com](mailto:editorial.bmjopen@bmj.com)

# BMJ Open

## Protocol for a Single-Centre Prospective Observational Study of Postoperative Delirium Following Total Joint Arthroplasties among South East Asians

|                                 |                                                                                                                                                                                                                                                                                                                                                                                                                                                                                                                                                                                                                                               |
|---------------------------------|-----------------------------------------------------------------------------------------------------------------------------------------------------------------------------------------------------------------------------------------------------------------------------------------------------------------------------------------------------------------------------------------------------------------------------------------------------------------------------------------------------------------------------------------------------------------------------------------------------------------------------------------------|
| Journal:                        | <i>BMJ Open</i>                                                                                                                                                                                                                                                                                                                                                                                                                                                                                                                                                                                                                               |
| Manuscript ID                   | bmjopen-2017-019426                                                                                                                                                                                                                                                                                                                                                                                                                                                                                                                                                                                                                           |
| Article Type:                   | Protocol                                                                                                                                                                                                                                                                                                                                                                                                                                                                                                                                                                                                                                      |
| Date Submitted by the Author:   | 04-Sep-2017                                                                                                                                                                                                                                                                                                                                                                                                                                                                                                                                                                                                                                   |
| Complete List of Authors:       | abdullah, hairil; Singapore General Hospital, Department of Anaesthesiology<br>Tan, Rou Xi, Sapphire; University of Cambridge Pembroke College<br>Lee, Si Jia; Singapore General Hospital, Department of Anaesthesiology<br>Rahmatullah Bin Abd Razak, Hamid; Singapore General Hospital,<br>Department of Orthopaedic Surgery<br>Seet, Rachel; Singapore General Hospital, Department of Anaesthesiology<br>Ying, Hao; Singapore General Hospital, Health Services Research Unit<br>Sethi, Ervin; Singapore General Hospital, Department of Orthopaedic<br>Surgery<br>Sim, Eileen; Singapore General Hospital, Department of Anaesthesiology |
| <b>Primary Subject Heading</b>: | Anaesthesia                                                                                                                                                                                                                                                                                                                                                                                                                                                                                                                                                                                                                                   |
| Secondary Subject Heading:      | Geriatric medicine, Mental health, Anaesthesia                                                                                                                                                                                                                                                                                                                                                                                                                                                                                                                                                                                                |
| Keywords:                       | postoperative, delirium, total joint arthroplasty, incidence                                                                                                                                                                                                                                                                                                                                                                                                                                                                                                                                                                                  |
|                                 |                                                                                                                                                                                                                                                                                                                                                                                                                                                                                                                                                                                                                                               |

SCHOLARONE™  
Manuscripts

**TITLE**

Protocol for a Single-Centre Prospective Observational Study of Postoperative Delirium Following Total Joint Arthroplasties among South East Asians

Hairil Rizal Abdullah<sup>1</sup>, Sapphire RouXi Tan<sup>2</sup>, Si Jia Lee<sup>3</sup>, Hamid Rahmatullah Bin Abd Razak<sup>4</sup>, Rachel Huiqi Seet<sup>5</sup>, Ying Hao<sup>1</sup>, Ervin Sethi<sup>6</sup>, Eileen Yilin Sim<sup>3</sup>

<sup>1</sup>Consultant  
Department of Anaesthesiology  
Singapore General Hospital  
Adjunct Assistant Professor  
Duke-NUS Medical School  
Singapore

<sup>2</sup>Medical Student  
University of Cambridge  
Cambridge, United Kingdom

<sup>3</sup>Senior Resident  
Department of Anaesthesiology  
Singapore General Hospital  
Singapore

<sup>4</sup>Senior Resident  
Department of Orthopaedic Surgery  
Singapore General Hospital  
Singapore

<sup>5</sup>Medical Officer  
Department of Anaesthesiology  
Singapore General Hospital  
Singapore

<sup>6</sup>House Officer  
Department of Orthopaedic Surgery  
Singapore General Hospital  
Singapore

**\*Please address correspondence to:**

Hairil Rizal Abdullah

1  
2  
3 Department of Anaesthesiology  
4 Singapore General Hospital  
5 Outram Road  
6 Singapore 169608  
7 Email : hairil.rizal.abdullah@singhealth.com.sg  
8 Telephone: (65)63265519  
9

10  
11  
12 **Word count:** 3713  
13

14  
15 **Keywords:** postoperative, delirium, total joint arthroplasty, incidence  
16  
17  
18  
19  
20  
21  
22  
23  
24  
25  
26  
27  
28  
29  
30  
31  
32  
33  
34  
35  
36  
37  
38  
39  
40  
41  
42  
43  
44  
45  
46  
47  
48  
49  
50  
51  
52  
53  
54  
55  
56  
57  
58  
59  
60

**CONTRIBUTORSHIP STATEMENT**

| <b>Author</b>                   | <b>Role/Responsibility</b>                                                                                                                                                                                                                                                                                                                                      |
|---------------------------------|-----------------------------------------------------------------------------------------------------------------------------------------------------------------------------------------------------------------------------------------------------------------------------------------------------------------------------------------------------------------|
| Hairil Rizal Abdullah           | Designed and conceptualized study<br>Prepared draft manuscript<br>Revised draft manuscript<br>Approved final manuscript for submission<br>Statistical calculations<br>Agrees to be accountable for all aspects of the work in ensuring that questions related to the accuracy or integrity of any part of the work are appropriately investigated and resolved. |
| Sapphire RouXi Tan              | Designed and conceptualized study<br>Prepared draft manuscript<br>Revised draft manuscript<br>Approved final manuscript for submission<br>Statistical calculations<br>Agrees to be accountable for all aspects of the work in ensuring that questions related to the accuracy or integrity of any part of the work are appropriately investigated and resolved. |
| Si Jia Lee                      | Designed and conceptualized study<br>Revised draft manuscript<br>Approved final manuscript for submission<br>Agrees to be accountable for all aspects of the work in ensuring that questions related to the accuracy or integrity of any part of the work are appropriately investigated and resolved.                                                          |
| Hamid Rahmatullah Bin Abd Razak | Designed and conceptualized study<br>Revised draft manuscript<br>Approved final manuscript for submission<br>Agrees to be accountable for all aspects of the work in ensuring that questions related to the accuracy or integrity of any part of the work are appropriately investigated and resolved.                                                          |
| Rachel Huiqi Seet               | Designed and conceptualized study<br>Revised draft manuscript<br>Approved final manuscript for submission<br>Agrees to be accountable for all aspects of the work in ensuring that questions related to the accuracy or integrity of any part of the work are appropriately investigated and resolved.                                                          |
| Ying Hao                        | Designed and conceptualized study                                                                                                                                                                                                                                                                                                                               |

|                  |                                                                                                                                                                                                                                                                                                        |
|------------------|--------------------------------------------------------------------------------------------------------------------------------------------------------------------------------------------------------------------------------------------------------------------------------------------------------|
|                  | Revised draft manuscript<br>Approved final manuscript for submission<br>Statistical calculations<br>Agrees to be accountable for all aspects of the work in ensuring that questions related to the accuracy or integrity of any part of the work are appropriately investigated and resolved.          |
| Ervin Sethi      | Designed and conceptualized study<br>Revised draft manuscript<br>Approved final manuscript for submission<br>Agrees to be accountable for all aspects of the work in ensuring that questions related to the accuracy or integrity of any part of the work are appropriately investigated and resolved. |
| Eileen Yilin Sim | Designed and conceptualized study<br>Revised draft manuscript<br>Approved final manuscript for submission<br>Agrees to be accountable for all aspects of the work in ensuring that questions related to the accuracy or integrity of any part of the work are appropriately investigated and resolved. |

## ABSTRACT

### Introduction

Postoperative delirium is a serious and common complication in older adults following Total Joint Arthroplasties (TJA). It is associated with increased risk of postoperative complications, mortality, length of hospital stay and postdischarge institutionalisation. Thus, it has a negative impact on the health-related quality of life of the patient and poses a large economic burden. This study aims to characterise the incidence of postoperative delirium following TJA in the South East Asian population, and investigate any risk factors or associated outcomes.

### Methods and analysis

This is a single-centre prospective observational study, recruiting patients between 65 and 90 years old undergoing elective Total Knee Arthroplasty or Total Hip Arthroplasty. Exclusion criteria included patients with clinically diagnosed dementia. Preoperative and intraoperative data will be obtained prospectively. The primary outcome will be the presence of postoperative delirium assessed using the Confusion Assessment Method on postoperative day 1, 2, 3 and day-of-discharge. Other secondary outcomes assessed postoperatively will include hospital outcomes, pain at rest, knee function, health-related quality of life and POMS-defined morbidity. Data will be analysed to calculate the incidence of postoperative delirium. Potential risk factors and any associated outcomes of postoperative delirium will also be determined.

### Ethics and dissemination

This study has been approved by the Singapore General Hospital Institutional Review Board (SGH IRB) (CIRB Ref: 2017/2467) and is registered on the ClinicalTrials.gov registry (Identified: NCT03260218). An informed consent form will be signed by all participants before recruitment and translators will be made available to non-English speaking participants. The results of this study will be presented at international conferences and submitted to a peer-reviewed journal. The data collected will also be made available in a public data repository.

## STRENGTHS AND LIMITATIONS

### Strengths

1. This study is the first to evaluate the incidence of postoperative delirium in the elderly above 65 years old following TKA and THA in Singapore.
2. Association of variables to occurrence of postoperative delirium that have not been well studied such as hand grip strength, STOP-Bang score and long-term outcomes including knee function and HRQoL will be analysed.
3. The Confusion Assessment Method (CAM) will be used, which is a gold standard measure for detection of delirium.

### Limitations

1. The study is conducted in a single centre in Singapore which may limit the generalisability of the results of the study.
2. Delirium will be only assessed once a day, and the presence of delirium may be missed due to the fluctuating nature of the condition.



## INTRODUCTION

Delirium is a neurocognitive disorder characterised by a disturbance in attention, level of consciousness and cognition, in which symptoms are acute in onset and may fluctuate in severity throughout the day<sup>1</sup>. Delirium occurs as a serious and common perioperative complication in older adults following total joint arthroplasty (TJA). A recent meta-analysis by Scott et al reported an incidence of 17%, but the rates reported by individual studies varied substantially<sup>2</sup>. In particular, a study of the Asian population in China by Chen et al reported an incidence of 16.5% following TJA in elderly above 60 years old<sup>3</sup>. However, the incidence has not yet been well-documented in the South-East Asian population, exposing a knowledge gap. With the demand for total hip arthroplasty (THA) expected to rise by almost 2-fold and that for total knee arthroplasty (TKA) by almost 7-fold by 2030<sup>4</sup>, postoperative delirium is likely to become a significant health burden.

Postoperative delirium has been associated with increased morbidity and cost. Patients with delirium after surgery have an increased risk of major postoperative complications and increased mortality (8% vs 2%)<sup>5,6</sup>. They also experience significantly longer hospital stay (median 6 days longer) and are at increased risk of subsequent postdischarge institutionalisation (OR 1.77-3.29)<sup>6-8</sup>, which are associated with higher total procedural cost<sup>9</sup>. Therefore, postoperative delirium can not only impact the health-related quality of life of the patient, but also pose a large economic burden both in the short and long term. Poor compliance with postoperative therapy may be a reason for the worse outcomes associated with postoperative delirium. Low cognitive function has been shown to be a significant predictor of exercise adherence in older women<sup>10</sup>, which is part of standard rehabilitation after TKA.

Identifying risk factors of postoperative delirium may be important for preventing its occurrence and consequences, and guide treatment of patients with delirium. As most TJA operations are elective, there may be opportunity to address the modifiable risk factors to optimise the patient before the surgery or implement perioperative management strategies which can decrease the negative outcomes of postoperative delirium. Age has been reported as an important predisposing risk factor<sup>11,12</sup>, which makes the population under study particularly at risk of postoperative delirium. The average age of this population is 71, and majority of patients are 65 years or older (81.3% for TKR and 69.5% for THR)<sup>9</sup>. Other reported predisposing risk factors include pre-existing cognitive impairment (OR 2.6-6.5), poor physical status (OR 1.7-5.7), alcohol abuse (OR 1.9-5.5)<sup>7,11,12</sup>. A meta-analysis by Yuan et al identified precipitating risk factors, such as low postoperative O<sub>2</sub> saturation (OR 1.59-4.18) and pain at rest (OR 1.63-6.20)<sup>13</sup>. However, few studies have investigated the risk factors associated with postoperative delirium following TJA specifically.

Given the limited knowledge about postoperative delirium especially in the South East Asian population, together with the increasing number of older adults undergoing TJA, this study aims to characterise the incidence of delirium in older adults undergoing elective TJA. We hypothesise that the incidence detected will be similar to that in Western studies, as the incidence in the Asian population reported in the study in China was comparable to the values seen in the Western population. This study also aims to identify risk factors of postoperative delirium following elective TJA, including demography, comorbidities, clinical laboratory data and drugs used in the perioperative period. This will enable the provision of better perioperative care for prospective patients undergoing TJA.

## METHODS AND ANALYSIS

### Study design

Institutional Review Board approval was obtained (Singhealth CIRB 2017/2467) prior to starting the study. This is a single centre, prospective observational study conducted at a tertiary public hospital in Singapore (Singapore General Hospital (SGH)). SGH is the largest hospital in Singapore with 1,597 beds in 2013<sup>14</sup>. 1,500 TKA surgeries were performed in SGH in 2007, accounting for 65% of all TKA surgeries in Singapore<sup>15</sup>.

### Study population

Patients aged between 65 and 90 undergoing elective total joint (hip or knee) replacement surgery in Singapore General Hospital will be screened for eligibility. Exclusion criteria includes patients who are unable to give their own consent for the surgery and anaesthesia. Patients with clinically diagnosed dementia will also be excluded from the study as they are deemed not to have capacity for consent.

All eligible patients will be identified from the appointment list of attendees of the preoperative evaluation clinic (PEC) at SGH where the patients attend for preoperative assessment and counselling by the anaesthetists. Patients between 65 and 90 years old undergoing TKA or THA will be approached and invited to enrol into the study. Informed consent will be obtained then.

### Preoperative data

We will collect the patients' baseline characteristics preoperatively. This will allow for the identification of risk factors or correction of confounding factors during analysis of the results.

#### Data on cognitive status

Before the operation, each patient will be interviewed to assess their baseline cognitive status. The Mini-Mental State Examination (MMSE) will be used, which is a 11-question screening tool used to evaluate the cognitive aspects of mental function<sup>16</sup>. It measures domains of cognitive function including memory, attention, language, praxis and visuospatial ability. A score of 0-30 can be obtained with higher values denoting better cognitive function. A score of <24 suggests cognitive impairment. The test was adapted for use in Singapore, and the changes and reasons for the changes shown in Figure 1 below. In addition, the test will be administered in English, Chinese or Malay, according to the language the participant is most well-versed in. The Chinese version of MMSE that will be used was previously validated in Shanghai<sup>17</sup> and in Singapore<sup>18</sup>. The Malay version of MMSE that will be used was developed by translation from the English version. The Chinese and Malay versions of MMSE have similar test questions and are scored the same way as the English version, but there some differences shown in Figure 2. However, a recent study in Singapore has shown that there were significant ethnic differences in unadjusted MMSE scores using the different versions of MMSE. These differences were not eliminated after accounting for known correlates of MMSE performance such as socioeconomic status, comorbid illnesses, functional health status, and health-related behaviours<sup>19</sup>.

| Item no. | Original version            | Adapted version                                              | Reasons                                                                      |
|----------|-----------------------------|--------------------------------------------------------------|------------------------------------------------------------------------------|
| 1        | "What is the season?"       | Without looking at your watch, what time is it?"             | There are no seasons in Singapore.                                           |
| 2a       | "What county are we in?";   | "What area/street are we in?";                               | Singapore is a city country; "Singapore" would only the only correct answer. |
| 2b       | "What town/city are we in?" | "Which part of Singapore (North/South/East/West) are we in?" | Singapore is a city country; "Singapore" would only the only correct answer. |

Figure 1 - Changes in the adapted version for use in Singapore

| Item no. | English version                                | Chinese version      | Malay version                                    |
|----------|------------------------------------------------|----------------------|--------------------------------------------------|
| 4        | Spell the word "WORLD" backwards               | 请把这句话倒说一遍 – "天上有月亮"  | Terbalikkan ejaan "DUNIA"                        |
| 7        | Repeat the following – "no ifs, ands, or buts" | 请清除的重复一遍 – "四十四只石狮子" | Ulangan perkataan – "dahulu, kini dan selamanya" |

Figure 2 - Differences between the English, Chinese and Malay MMSE

CAM will also be performed prior to the operation to obtain the patient's baseline score. CAM is a screening instrument for delirium intended for use by non-psychiatrically-trained clinicians based on the Diagnostic and Statistical Manual of Mental Disorders (DSM)-III-R criteria<sup>20</sup>. It involves an interview whereby delirium can be diagnosed using the CAM algorithm based on 4 criteria – (1) acute onset or fluctuating course, (2) inattention, (3) disorganised thinking and (4) altered level of consciousness. Delirium is said to be present if criteria 1 and 2 and either of 3 or 4 are present. CAM has a sensitivity of 94-100%, specificity of 90-95%, and high inter-observer reliability<sup>21</sup>. This enables a new case of delirium in the postoperative period to be detected.

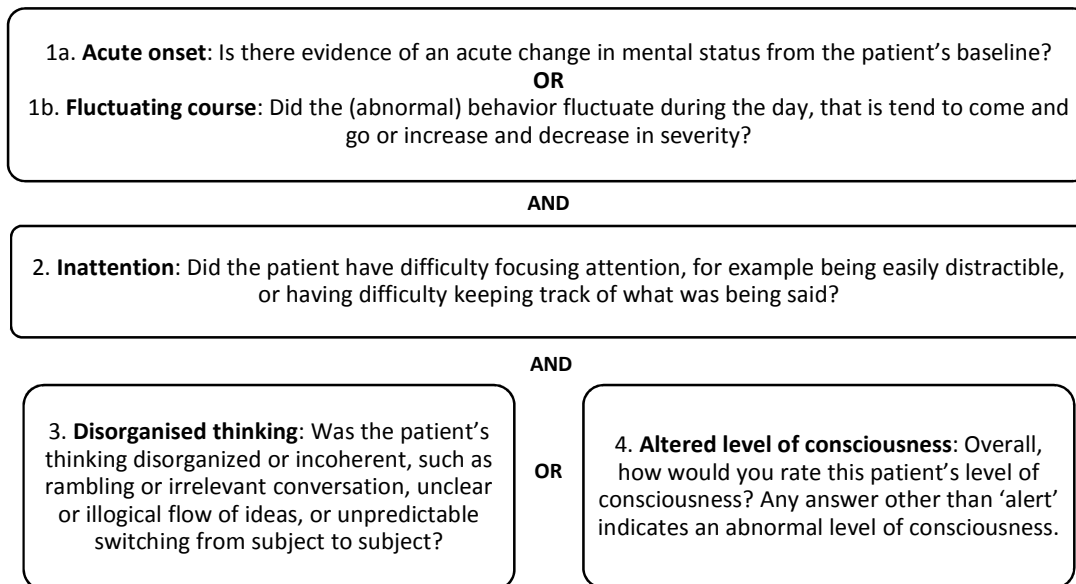

23  
24  
25  
26  
27  
28  
29  
30  
31  
32  
33  
34  
35  
36  
37  
38  
39  
40  
41  
42  
43  
44  
45  
46  
47  
48  
49  
50  
51  
52  
53  
54  
55  
56  
57  
58  
59  
60

Figure 3 – CAM criteria: at least one criteria on each of the 3 rows must be met for a positive result

### Other data

Sensory impairment will be assessed during the preoperative interviews. Patients will be asked to wear their visual or hearing aids during these interviews. A patient will be considered to have visual or hearing impairment if the research member conducting the interview is unable to perform the interview normally due to the sensory impairment, such as raising his/her voice for a patient with impaired hearing. The preoperative MMSE assessment provides a useful tool in assessing for visual impairment as it has several vision-dependent items (naming objects, following a written command, instructions to handle a piece of paper, writing a sentence, copying a diagram)<sup>22</sup>.

The grip strength of each patient will also be measured using the JAMAR® Plus+ Digital Hand Dynamometer (Sammons Preston Inc, Bolingbrook, IL). Hand dynamometry has acceptable reliability and validity for measurement of grip strength<sup>23</sup>, which can serve as an indicator of muscle function and physical fitness. The normative value of hand grip strength for elderly in Singapore has recently been published, decreasing from 18.6kg and 29.3kg for females and males respectively in the 65-69 age group to 12.4kg and 18.5kg in the 85+ age group<sup>24</sup>.

The patient baseline characteristics will be obtained from the medical records. Perioperative data is available through the PEC database as well as the Orthopaedic Diagnostic Centre (ODC) total joint registry, which will be prospectively entered into the REDCap™ database. This will include data regarding patient's demographics, smoking history, alcohol history, pre-existing medical conditions, preoperative medications.

Each patient will also be rated preoperatively by an anaesthesiologist in the PEC based on the American Society of Anaesthesiologists (ASA) physical status classification<sup>25</sup>. It is a scale from 1 to 5, where 1 represents a completely healthy fit patient and 5 representing a moribund patient who is not expected to live 24 hour with or without surgery. For our analysis, we will be calculating each patient's perioperative risk based on the Charlson

1  
2  
3 Comorbidity Index (CCI)<sup>26</sup>. 19 different comorbid medical conditions are assigned weights of  
4 1, 2, 3 and 6 according to the degree to which they predicted mortality, and the sum of these  
5 values gives the final score. It is a valid method of estimating risk of mortality resulting from  
6 comorbidities<sup>27</sup>. The STOP-Bang score will also be calculated for each patient. The STOP-  
7 Bang questionnaire was a good screening tool for diagnosing obstructive sleep apnoea, with  
8 a sensitivity of 89.0% and accuracy of 79.1%<sup>28</sup>. Preoperative laboratory results, including  
9 data about haemoglobin or creatinine level, will also be collected.  
10

### 11 12 13 **Intraoperative data**

14 Data regarding the surgery will be collected. Intraoperative data includes type of arthroplasty  
15 performed (TKA or THA), type of anaesthesia (spinal, general or other anaesthesia), use of  
16 femoral nerve block, intraoperative drug use, tourniquet time, intra-articular injections and  
17 blood transfusion (number of pints transfused). Occurrence of hypotension, which is defined  
18 as a mean arterial pressure <60mmHg, and its duration will also be recorded.  
19  
20

### 21 22 23 **Postoperative data**

#### 24 Primary outcome

25 The primary outcome will be the presence of postoperative delirium following TJA. Each  
26 patient will be assessed for delirium on postoperative day (POD) 1, 2 and 3 in the wards at  
27 7am as well as the day of discharge. Delirium will not be evaluated on POD 0 due to  
28 difficulty in differentiating delirium from the effects of residual anaesthesia.  
29

30 The Confusion Assessment Method (CAM) will be used to detect postoperative delirium and  
31 delirium severity. Delirium is said to be present if the patient meets the CAM criteria for any  
32 of the postoperative assessments. Patients assessed to have delirium will be referred to the  
33 psychiatrists for further management.  
34  
35

#### 36 Short-term secondary outcomes

37 Postoperative complications will be assessed by the Postoperative Morbidity Survey (POMS).  
38 This is a 9-point survey that can be easily used by clinicians to characterise short-term  
39 postoperative morbidity in their respective settings<sup>29</sup>. It is designed to only identify morbidity  
40 of a type and severity that could prolong LOS. Using POMS, postoperative morbidity  
41 outcomes can be dichotomised into 2 categories – the absence and presence of morbidity.  
42 Initial data from our centre demonstrated a median LOS of 4 days following primary  
43 unilateral TKA<sup>30</sup>. This was assumed to represent an uncomplicated postoperative course,  
44 and any POMS-defined morbidity on POD 0-4 might be expected as part of the usual course  
45 of surgery. POMS will thus be assessed on POD 5, as it will have face validity in this cohort  
46 for identifying patients experiencing postoperative complication(s). It has also been reported  
47 to have good inter-rater reliability and acceptability to patients<sup>31</sup>.  
48

49 Other postoperative outcomes that will be obtained include postoperative nausea and  
50 vomiting (PONV), length of stay (LOS) and 30-day readmission rates. 30-day readmission is  
51 defined as readmission within 30 days of initial admission. The reason for readmission will  
52 also be obtained.  
53  
54  
55  
56  
57  
58  
59

### Long-term secondary outcomes

Longer-term outcomes such as functional and health-related quality-of-life (HRQoL) outcomes will also be recorded by the ODC total joint registry at 6 months, 1 year, 2 years and 5 years postoperatively. The ODC tracks clinical outcome measures during pre- and postoperative functional assessments of the patients in SGH. Their total joint registry contains data about outcomes from knee and hip arthroplasties.

Knee function will be measured using the new Knee Society Knee Score (KSKS) and Function Score (KSFS)<sup>32</sup>. The physician-derived KSKS measures alignment, stability, joint motion and symptoms experienced. The patient-derived KSFS evaluates use of walking aids and supports, ability to complete standard activities of daily living and discretionary activities. The KSKS and KSFS each range from 0 (worst) to 100 (best). Both provide a validated rating of the functional outcome of the patient and knee prosthesis after TKA<sup>33</sup>. In addition, the Oxford Knee Score (OKS)<sup>34</sup> will also be used, which is a 12-item, patient-assessed questionnaire designed specifically for use in patients undergoing TKA [7]. It assesses an individual's pain and physical disability. Each item is scored from 1 (least difficulty/severity) to 5 (most difficulty/severity), and individual item scores are summed to yield an overall score ranging from 12 (no pain or limitation) to 60 (severe pain or limitation). A lower OKS indicates a better outcome. It has good reliability, construct and content validity, and sensitivity to clinically important changes over time<sup>34,35</sup>. It correlates strongly with pain but less with postoperative functioning<sup>36</sup>.

HRQoL will be assessed based on the 36-Item Short Form Health Survey (SF-36)<sup>37</sup> to obtain a baseline score. It consists of 36 questions categorised into 8 domains (physical functioning, bodily pain, role limitations due to physical health problems, role limitations due to personal or emotional problems, emotional well-being, social functioning, energy/fatigue, and general health perceptions). Higher scores indicate better health status and quality of life.

Days alive and out of hospital (DAOH) will also be determined for each patient at 1 month, 6 months and 12 months to assess overall impact of postoperative delirium on morbidity and mortality. DAOH will be calculated based on death date (if present) and duration of all subsequent hospitalisations until the follow-up date. This will be recorded as a percentage by dividing DAOH by total potential follow-up period, which is the time period between the operation and the respective dates of follow-up (1 month, 6 months and 12 months). %DAOH is a useful measure as it emphasises the deaths occurring early in follow-up and takes into account the severity (duration) of any hospitalisation.<sup>38</sup>

### Postoperative risk factors

Other postoperative data will be collected as variables for risk factors.

Postoperative pain at rest will be evaluated using the pain Visual Analog Scale (VAS) during the same visit as CAM on POD 1, 2 and 3. Each patient will score pain experienced at rest on a scale, with 0 = no pain and 10 = maximum pain.

Sensory impairment will also be assessed during the postoperative interviews similar to the preoperative assessments.

The flowchart shown in Figure 4 depicts a patient's journey starting from enrolment in the PEC.



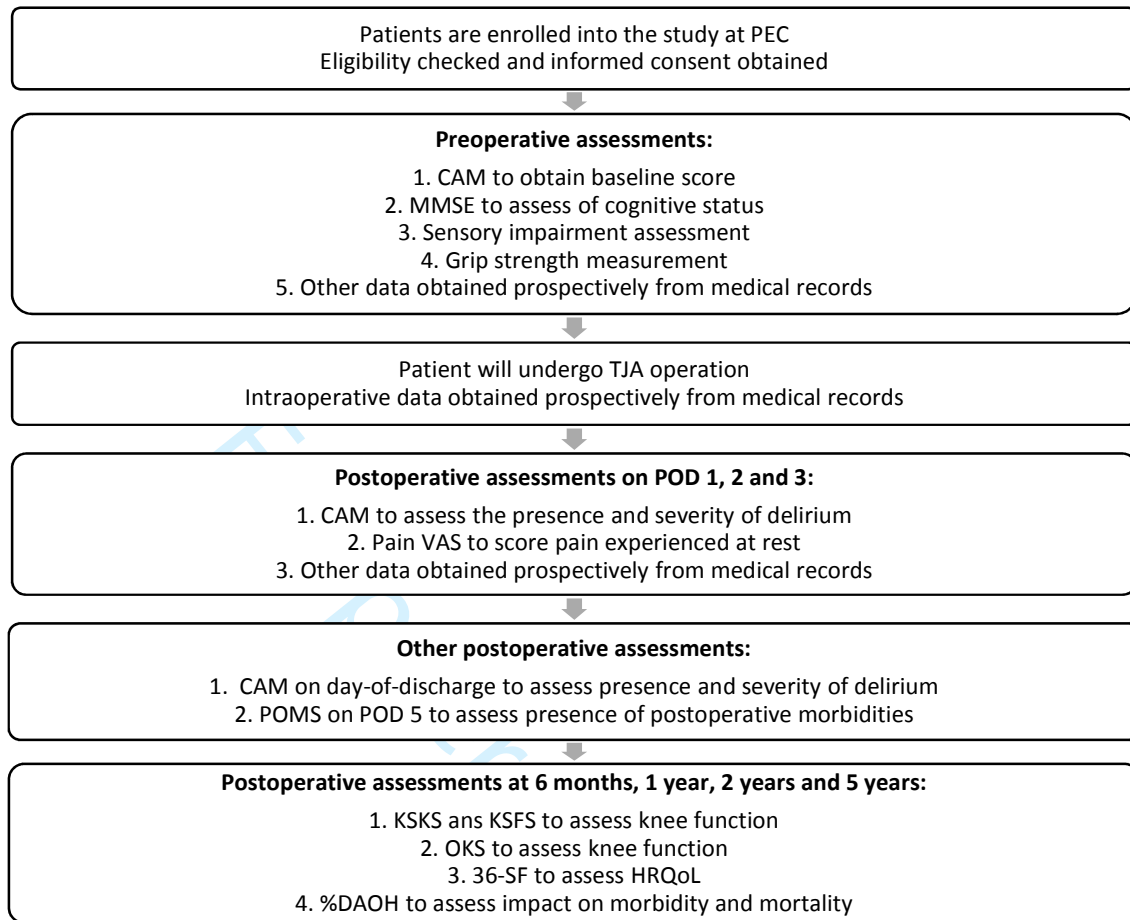

Figure 4 - Flowchart depicting a patient's timeline during the study

### Data management

Patient data will be kept confidential throughout the study. All electronic study data entry, storage and analysis will be done according to institutional data security policy, using password protected data in secure systems.

The patient data collected will be de-identified and the key kept securely separated with access limited to principal investigator and co-investigators. A study-related identification number given to each patient will be used on the case report form. Research members will enter the de-identified data into the REDCap™ (Research Electronic Data Capture) tool hosted on a secure server at Singapore General Hospital<sup>36</sup>. The hardcopy of the research data will be securely stored within the department. The softcopy of research data will be saved in a password-protected file and will be stored in institution approved login-protected system and encrypted hard-drive. Only study members will have access to the data.

### Power and sample size calculations

The sample size will be calculated based on the incidence of postoperative delirium. Based on existing literature, the estimated incidence of postoperative delirium following TJA is

1  
2  
3 around 10%. Using this estimate, a minimum sample size of 150 patients will be needed to  
4 detect the incidence with a precision of 5% and power of 80%. The sample size of 200  
5 patients is needed to measure incidence to account for attrition.

6  
7 However, this study will also be analysing the factors which may be correlated to  
8 postoperative delirium by logistic regression. A study population size of 500 will thus be  
9 targeted to be able to run a multiple logistic model while minimising the limitation of a small  
10 number of events of postoperative delirium.

### 11 12 13 **Statistical analyses**

14  
15 The incidence of postoperative delirium following TJA using the standard formula – the  
16 number of patients diagnosed to have postoperative delirium divided by the total number of  
17 patients in the study, and the result expressed as a percentage.

18  
19 Potential risk factors of postoperative delirium will also be identified by comparing the  
20 perioperative data recorded between the patients with and without postoperative delirium.  
21 Data will first be summarised using descriptive statistics including mean, standard deviation  
22 (SD), median, range and frequency tables. Univariate analyses will then be used identify the  
23 differences between the two groups. Data of continuous variables will be compared using  
24 the Student's t-test (normally distributed data) or the Wilcoxon rank sum test (not normally  
25 distributed data). Data of categorical variables will be compared by Pearson Chi-square test  
26 or Fisher's exact test.

27  
28 The variables which are statistically significant or close to significant (p value <0.05 or <0.1)  
29 between the two groups of patients will then be selected for inclusion in a multivariate logistic  
30 regression model. This will determine the independent predictors of postoperative delirium.  
31 The final model will be determined by sensitivity analysis. The sensitivity analysis can help  
32 us to understand the contribution of each parameter to the model outputs, investigate which  
33 parameter will have the biggest influence and then refine the model to obtain the final model  
34 which is statistically and clinically meaningful. Odds ratio (OR) will be used to describe the  
35 relative risks of postoperative delirium.

36  
37 Postoperative outcomes which are associated with the incidence of postoperative delirium  
38 will also be examined by comparing patients with and without postoperative delirium. The  
39 postoperative POMS score, incidence of PONV, LOS, incidence of 30-day readmission  
40 and %DAOH will be similarly compared using Student's t-test and Person Chi-square tests  
41 as appropriate.

42  
43 For the long-term postoperative outcomes, the median postoperative SF-36, KSKS, KSFS  
44 and OKS scores at 6 months, 1 year, 2 years and 5 years will be compared to the median  
45 preoperative baseline scores using the Wilcoxon matched pairs sign rank test. The tests with  
46 a change greater than the minimally clinically important difference (MCID) will be identified.  
47 The MCID values for each test will be obtained from the pre-existing literature. These  
48 variables will then be analysed by analysis of covariance (ANCOVA) to identify predictors of  
49 the long-term postoperative test scores. All predictor variables were incorporated into the  
50 multivariate ANCOVA model. Analyses were performed separately for the various tests that  
51 demonstrated changes greater than MCID.  
52  
53  
54  
55  
56  
57  
58  
59  
60



### ETHICS AND DISSEMINATION

This study has been approved by the Singapore General Hospital Institutional Review Board (SGH IRB) (CIRB Ref: 2017/2467) and is registered on the ClinicalTrials.gov registry (Identified: NCT03260218). In the event of any important protocol modifications, all investigators, SGH IRB and trial participants will be notified.

The results of this study will be presented at international conferences and submitted to a peer-reviewed journal. The data collected will also be made available in a public data repository.

All eligible participants will be approached by the research assistant during their visit to the preoperative evaluation clinic. They will be given an explanation about the study, a patient information sheet and a consent form. They will then be given an ample time to consider if they would like to participate in the study. They will also be allowed to ask questions freely. If the participant expresses an interest to participate in the study, a written consent will be obtained. The consent forms are in English. However, participants from non-English speaking backgrounds will be provided a translator. For illiterate participants, an accompanying family member will be approached to verify and witness the consent process.

## REFERENCES

1. American Psychiatric Association: Diagnostic and Statistical Manual of Mental Disorders, Fifth Edition. Arlington, VA, American Psychiatric Association, 2013.
2. Scott JE, Mathias JL, Kneebone AC. Incidence of delirium following total joint replacement in older adults: A meta-analysis. *Gen Hosp Psychiatry*. 2015;37(3):223-229. doi:10.1016/j.genhosppsy.2015.02.004.
3. Chen W, Ke X, Wang X, et al. Prevalence and risk factors for postoperative delirium in total joint arthroplasty patients: A prospective study. *Gen Hosp Psychiatry*. 2017;46:55-61. doi:10.1016/j.genhosppsy.2017.03.008.
4. Kurtz S, Ong K, Lau E, Mowat F, Halpern M. Projections of Primary and Revision Hip and Knee Arthroplasty in the United States from 2005 to 2030. *J Bone Jt Surg*. 2007;89(4):780. doi:10.2106/JBJS.F.00222.
5. James L. Rudolph, MD S and, Edward R. Marcantonio, MD S. Postoperative Delirium: Acute Change with Long-Term Implications. *Anesth Analg*. 2011. doi:10.1038/jid.2014.371.
6. Rudolph JL, Jones RN, Rasmussen LS, Silverstein JH, Inouye SK, Marcantonio ER. Independent Vascular and Cognitive Risk Factors for Postoperative Delirium. *Am J Med*. 2007;120(9):807-813. doi:10.1016/j.amjmed.2007.02.026.
7. Marcantonio ER, Goldman L, Mangione CM, et al. A clinical prediction rule for delirium after elective noncardiac surgery. *JAMA*. 1994;271(2):134-139. <http://www.ncbi.nlm.nih.gov/pubmed/8264068>. Accessed July 13, 2017.
8. Witlox J, Eurelings LSM, de Jonghe JFM, Kalisvaart KJ, Eikelenboom P, van Gool WA. Delirium in Elderly Patients and the Risk of Postdischarge Mortality, Institutionalization, and Dementia. *JAMA*. 2010;304(4):443. doi:10.1001/jama.2010.1013.
9. Lovald ST, Ong KL, Malkani AL, et al. Complications, Mortality, and Costs for Outpatient and Short-Stay Total Knee Arthroplasty Patients in Comparison to Standard-Stay Patients. *J Arthroplasty*. 2014;29(3):510-515. doi:10.1016/j.arth.2013.07.020.
10. Findorff MJ, Wyman JF, Gross CR. Predictors of long-term exercise adherence in a community-based sample of older women. *J Womens Health (Larchmt)*. 2009;18(11):1769-1776. doi:10.1089/jwh.2008.1265.
11. Raats JW, van Eijnsden WA, Crolla RMPH, Steyerberg EW, van der Laan L, Hummel T. Risk Factors and Outcomes for Postoperative Delirium after Major Surgery in Elderly Patients. Marengoni A, ed. *PLoS One*. 2015;10(8):e0136071. doi:10.1371/journal.pone.0136071.
12. Elie M, Cole MG, Primeau FJ, Bellavance F. Delirium risk factors in elderly hospitalized patients. *J Gen Intern Med*. 1998;13(3):204-212. doi:10.1046/j.1525-1497.1998.00047.x.
13. Yuan X, Jiang Z, Song L, Yang L, He Y, Luo G. Risk factors for post-operative delirium in elderly Chinese patients. *Fam Med Community Heal*. 2014;2(4):32-40. doi:10.15212/FMCH.2014.0119.
14. Quick Facts – Singapore General Hospital. <https://www.sgh.com.sg/about-us/more-about-sgh/pages/quickfacts.aspx>. Accessed July 14, 2017.
15. Adult Reconstructive Service – Singapore General Hospital.

- 1  
2  
3 [https://www.sgh.com.sg/departments/ortho/services/pages/adult-reconstructive-](https://www.sgh.com.sg/departments/ortho/services/pages/adult-reconstructive-service.aspx)  
4 [service.aspx](https://www.sgh.com.sg/departments/ortho/services/pages/adult-reconstructive-service.aspx). Published 2014. Accessed July 14, 2017.
- 5  
6 16. Folstein MF, Folstein SE, McHugh PR. "Mini-mental state". A practical method for  
7 grading the cognitive state of patients for the clinician. *J Psychiatr Res.*  
8 1975;12(3):189-198. doi:10.1016/0022-3956(75)90026-6.
- 9  
10 17. Katzman R, Zhang MY, Ouang-Ya-Qu, et al. A Chinese version of the Mini-Mental  
11 State Examination; impact of illiteracy in a Shanghai dementia survey. *J Clin*  
12 *Epidemiol.* 1988;41(10):971-978. <http://www.ncbi.nlm.nih.gov/pubmed/3193141>.  
13 Accessed July 17, 2017.
- 14  
15 18. Sahadevan S, Lim PP, Tan NJ, Chan SP. Diagnostic performance of two mental  
16 status tests in the older chinese: influence of education and age on cut-off values. *Int*  
17 *J Geriatr Psychiatry.* 2000;15(3):234-241.  
18 <http://www.ncbi.nlm.nih.gov/pubmed/10713581>. Accessed July 17, 2017.
- 19  
20 19. Ng T-P, Niti M, Chiam P-C, Kua E-H. Ethnic and Educational Differences in Cognitive  
21 Test Performance on Mini-Mental State Examination in Asians. *Am J Geriatr*  
22 *Psychiatry.* 2007;15(2):130-139. doi:10.1097/01.JGP.0000235710.17450.9a.
- 23  
24 20. Confusion Assessment Method. © 1988, 2003, Hospital Elder Life Program. All rights  
25 reserved. Adapted from: Inouye SK et al. *Ann Intern Med.* 1990; 113:941-8.
- 26  
27 21. Inouye SK, Dyck CH van, Alessi CA, Balkin S, Siegal AP, Horwitz RI. Clarifying  
28 Confusion: The Confusion Assessment Method. *Ann Intern Med.* 1990;113(12):941.  
29 doi:10.7326/0003-4819-113-12-941.
- 30  
31 22. Pye A, Charalambous AP, Leroi I, Thodi C, Dawes P. Screening tools for the  
32 identification of dementia for adults with age-related acquired hearing or vision  
33 impairment: a scoping review. *Int Psychogeriatrics.* 2017:1-14.  
34 doi:10.1017/S104161021700120X.
- 35  
36 23. Mathiowetz V, Weber K, Volland G, Kashman N. Reliability and validity of grip and  
37 pinch strength evaluations. *J Hand Surg Am.* 1984;9(2):222-226.  
38 <http://www.ncbi.nlm.nih.gov/pubmed/6715829>. Accessed July 14, 2017.
- 39  
40 24. Ong HL, Abdin E, Chua BY, et al. Hand-grip strength among older adults in Singapore:  
41 a comparison with international norms and associative factors. *BMC Geriatr.*  
42 2017;17(1):176. doi:10.1186/s12877-017-0565-6.
- 43  
44 25. Daabiss M. American Society of Anaesthesiologists physical status classification.  
45 *Indian J Anaesth.* 2011;55(2):111-115. doi:10.4103/0019-5049.79879.
- 46  
47 26. Charlson ME, Pompei P, Ales KL, MacKenzie CR. A new method of classifying  
48 prognostic comorbidity in longitudinal studies: development and validation. *J Chronic*  
49 *Dis.* 1987;40(5):373-383. <http://www.ncbi.nlm.nih.gov/pubmed/3558716>. Accessed  
50 July 13, 2017.
- 51  
52 27. Charlson M, Szatrowski TP, Peterson J, Gold J. Validation of a combined comorbidity  
53 index. *J Clin Epidemiol.* 1994;47(11):1245-1251.  
54 <http://www.ncbi.nlm.nih.gov/pubmed/7722560>. Accessed July 17, 2017.
- 55  
56 28. Prasad KT, Sehgal IS, Agarwal R, Nath Aggarwal A, Behera D, Dhooria S. Assessing  
57 the likelihood of obstructive sleep apnea: a comparison of nine screening  
58 questionnaires. *Sleep Breath.* 2017:1-9. doi:10.1007/s11325-017-1495-4.
- 59  
60 29. Bennett-Guerrero E, Welsby I, Dunn TJ, et al. The use of a postoperative morbidity  
survey to evaluate patients with prolonged hospitalization after routine, moderate-risk,  
elective surgery. *Anesth Analg.* 1999;89(2):514-519. doi:10.1213/00000539-

- 1  
2  
3 199908000-00050.
- 4 30. Abdullah HR, Sim YE, Hao Y, et al. Association between preoperative anaemia with  
5 length of hospital stay among patients undergoing primary total knee arthroplasty in  
6 Singapore: a single-centre retrospective study. *BMJ Open*. 2017;7(6):e016403.  
7 doi:10.1136/bmjopen-2017-016403.
- 8  
9 31. Grocott MPW, Browne JP, Van der Meulen J, et al. The Postoperative Morbidity  
10 Survey was validated and used to describe morbidity after major surgery. *J Clin*  
11 *Epidemiol*. 2007;60(9):919-928. doi:10.1016/j.jclinepi.2006.12.003.
- 12  
13 32. Insall JN, Dorr LD, Scott RD, Scott WN. Rationale of the Knee Society clinical rating  
14 system. *Clin Orthop Relat Res*. 1989;(248):13-14.  
15 <http://www.ncbi.nlm.nih.gov/pubmed/2805470>. Accessed July 13, 2017.
- 16  
17 33. Scuderi GR, Bourne RB, Noble PC, Benjamin JB, Lonner JH, Scott WN. The new  
18 Knee Society Knee Scoring System. *Clin Orthop Relat Res*. 2012;470(1):3-19.  
19 doi:10.1007/s11999-011-2135-0.
- 20  
21 34. Dawson J, Fitzpatrick R, Murray D, Carr A. Questionnaire on the perceptions of  
22 patients about total knee replacement. *J Bone Joint Surg Br*. 1998;80(1):63-69.  
23 <http://www.ncbi.nlm.nih.gov/pubmed/9460955>. Accessed July 14, 2017.
- 24  
25 35. Garratt AM, Brealey S, Gillespie WJ. Patient-assessed health instruments for the  
26 knee: a structured review. *Rheumatology*. 2004;43(11):1414-1423.  
27 doi:10.1093/rheumatology/keh362.
- 28  
29 36. van Hove RP, Brohet RM, van Royen BJ, Nolte PA. High correlation of the Oxford  
30 Knee Score with postoperative pain, but not with performance-based functioning.  
31 *Knee Surgery, Sport Traumatol Arthrosc*. 2016;24(10):3369-3375.  
32 doi:10.1007/s00167-015-3585-9.
- 33  
34 37. Ware JE, Sherbourne CD. The MOS 36-item short-form health survey (SF-36). I.  
35 Conceptual framework and item selection. *Med Care*. 1992;30(6):473-483.  
36 <http://www.ncbi.nlm.nih.gov/pubmed/1593914>. Accessed July 13, 2017.
- 37  
38 38. Ariti CA, Cleland JGF, Pocock SJ, et al. Days alive and out of hospital and the patient  
39 journey in patients with heart failure: Insights from the Candesartan in Heart failure:  
40 Assessment of Reduction in Mortality and morbidity (CHARM) program. *Am Heart J*.  
41 2011;162(5):900-906. doi:10.1016/j.ahj.2011.08.003.
- 42  
43  
44  
45  
46  
47  
48  
49  
50  
51  
52  
53  
54  
55  
56  
57  
58  
59  
60

**FUNDING STATEMENT**

This work was supported by the Singhealth Duke-NUS Academic Medical Centre Nurturing Clinician Scientists Scheme Award, project number 12/FY2017/P1/15-A29. This funding source, Singhealth Duke-NUS Academic Medical Centre, has no role in the design of this study and will not have a role in the analysis and interpretation of the results.

**COMPETING INTEREST STATEMENT**

None.

For peer review only

**APPENDIX**

1. Preoperative data collection form (DCF)
2. Postoperative data collection form
3. POMS Instrument
4. SF-36 Instrument

For peer review only

## Appendix 1 – Preoperative DCF

### Postoperative Delirium Following Total Joint Arthroplasties among South East Asians

|                                                                                                                                                                                                                                                                                                                                                                                                                                                                                    |                                                                                                                                                                                                                                                                                                                                                                                 |                                                                                                                                                                                                                                                                                                                                                                                                                                                                                                                                                                                                                                       |                                                                                                                                                                                                                                                                                                                                                                                                                                                                                                                                                                                                                                       |
|------------------------------------------------------------------------------------------------------------------------------------------------------------------------------------------------------------------------------------------------------------------------------------------------------------------------------------------------------------------------------------------------------------------------------------------------------------------------------------|---------------------------------------------------------------------------------------------------------------------------------------------------------------------------------------------------------------------------------------------------------------------------------------------------------------------------------------------------------------------------------|---------------------------------------------------------------------------------------------------------------------------------------------------------------------------------------------------------------------------------------------------------------------------------------------------------------------------------------------------------------------------------------------------------------------------------------------------------------------------------------------------------------------------------------------------------------------------------------------------------------------------------------|---------------------------------------------------------------------------------------------------------------------------------------------------------------------------------------------------------------------------------------------------------------------------------------------------------------------------------------------------------------------------------------------------------------------------------------------------------------------------------------------------------------------------------------------------------------------------------------------------------------------------------------|
| Serial No: _____<br>Date of preoperative assessment:<br>_____                                                                                                                                                                                                                                                                                                                                                                                                                      |                                                                                                                                                                                                                                                                                                                                                                                 | <b>OP DETAILS</b><br>Surgeon: _____<br>Type of Operation:<br>TKR <input type="checkbox"/> THR <input type="checkbox"/><br>Unilateral L <input type="checkbox"/> / R <input type="checkbox"/> OR Bilateral <input type="checkbox"/><br>Primary <input type="checkbox"/> Revision <input type="checkbox"/><br>Pre-operative Dx: _____<br>_____<br>_____<br>Grip Strength: _____                                                                                                                                                                                                                                                         |                                                                                                                                                                                                                                                                                                                                                                                                                                                                                                                                                                                                                                       |
| <b>DEMOGRAPHIC</b><br>Age: _____<br>Gender: Male <input type="checkbox"/> Female <input type="checkbox"/><br>Race: Chinese <input type="checkbox"/> Malay <input type="checkbox"/> Indian <input type="checkbox"/> Others <input type="checkbox"/><br>Language:<br>English <input type="checkbox"/> Mandarin <input type="checkbox"/> Malay <input type="checkbox"/><br>Others _____<br>Highest education completed:<br>_____<br>Height: _____ m<br>Weight: _____ kg<br>BMI: _____ |                                                                                                                                                                                                                                                                                                                                                                                 | <b>BACKGROUND MEDICAL CONDITION</b><br>ASA: _____<br>Charlson Comorbidity Index<br>Overall score: _____                                                                                                                                                                                                                                                                                                                                                                                                                                                                                                                               |                                                                                                                                                                                                                                                                                                                                                                                                                                                                                                                                                                                                                                       |
| <b>CVS</b><br><input type="checkbox"/> Myocardial infarction<br><input type="checkbox"/> Congestive heart failure<br><input type="checkbox"/> Peripheral vascular disease                                                                                                                                                                                                                                                                                                          | <input type="checkbox"/> Smoking<br><input type="checkbox"/> Alcoholism<br>Diabetes:<br><input type="checkbox"/> OHGA <input type="checkbox"/> Insulin <input type="checkbox"/><br>Latest HbA1c _____<br><input type="checkbox"/> Chronic kidney disease<br><input type="checkbox"/> Pre-existing dementia<br><input type="checkbox"/> Other pre-existing neurological problems | <input type="checkbox"/> CVA<br><input type="checkbox"/> Parkinson Disease<br><input type="checkbox"/> Depression<br><input type="checkbox"/> Anxiety<br><input type="checkbox"/> Schizophrenia and other delusional disorders                                                                                                                                                                                                                                                                                                                                                                                                        | <input type="checkbox"/> Visual impairment<br><input type="checkbox"/> Hearing impairment<br>STOPBANG score _____<br><b>Chronic Medications</b><br><input type="checkbox"/> Benzodiazepine<br><input type="checkbox"/> Statin<br><input type="checkbox"/> Tramadol <input type="checkbox"/> Oxynorm <input type="checkbox"/><br>Anti-depressants<br><input type="checkbox"/> Tricyclics <input type="checkbox"/> SSRI <input type="checkbox"/> SNRI <input type="checkbox"/> MOAI<br><input type="checkbox"/><br>Anti-psychotics<br><input type="checkbox"/> Haloperidol <input type="checkbox"/> Quetiapine <input type="checkbox"/> |
| <b>CNS</b><br><input type="checkbox"/> Cerebrovascular disease<br><input type="checkbox"/> Hemiplegia or paraplegia<br><input type="checkbox"/> Dementia                                                                                                                                                                                                                                                                                                                           | <input type="checkbox"/> CVA<br><input type="checkbox"/> Parkinson Disease<br><input type="checkbox"/> Depression<br><input type="checkbox"/> Anxiety<br><input type="checkbox"/> Schizophrenia and other delusional disorders                                                                                                                                                  | <input type="checkbox"/> Visual impairment<br><input type="checkbox"/> Hearing impairment<br>STOPBANG score _____<br><b>Chronic Medications</b><br><input type="checkbox"/> Benzodiazepine<br><input type="checkbox"/> Statin<br><input type="checkbox"/> Tramadol <input type="checkbox"/> Oxynorm <input type="checkbox"/><br>Anti-depressants<br><input type="checkbox"/> Tricyclics <input type="checkbox"/> SSRI <input type="checkbox"/> SNRI <input type="checkbox"/> MOAI<br><input type="checkbox"/><br>Anti-psychotics<br><input type="checkbox"/> Haloperidol <input type="checkbox"/> Quetiapine <input type="checkbox"/> | <input type="checkbox"/> Visual impairment<br><input type="checkbox"/> Hearing impairment<br>STOPBANG score _____<br><b>Chronic Medications</b><br><input type="checkbox"/> Benzodiazepine<br><input type="checkbox"/> Statin<br><input type="checkbox"/> Tramadol <input type="checkbox"/> Oxynorm <input type="checkbox"/><br>Anti-depressants<br><input type="checkbox"/> Tricyclics <input type="checkbox"/> SSRI <input type="checkbox"/> SNRI <input type="checkbox"/> MOAI<br><input type="checkbox"/><br>Anti-psychotics<br><input type="checkbox"/> Haloperidol <input type="checkbox"/> Quetiapine <input type="checkbox"/> |
| <b>Respi</b><br><input type="checkbox"/> Chronic pulmonary disease                                                                                                                                                                                                                                                                                                                                                                                                                 | <input type="checkbox"/> CVA<br><input type="checkbox"/> Parkinson Disease<br><input type="checkbox"/> Depression<br><input type="checkbox"/> Anxiety<br><input type="checkbox"/> Schizophrenia and other delusional disorders                                                                                                                                                  | <input type="checkbox"/> Visual impairment<br><input type="checkbox"/> Hearing impairment<br>STOPBANG score _____<br><b>Chronic Medications</b><br><input type="checkbox"/> Benzodiazepine<br><input type="checkbox"/> Statin<br><input type="checkbox"/> Tramadol <input type="checkbox"/> Oxynorm <input type="checkbox"/><br>Anti-depressants<br><input type="checkbox"/> Tricyclics <input type="checkbox"/> SSRI <input type="checkbox"/> SNRI <input type="checkbox"/> MOAI<br><input type="checkbox"/><br>Anti-psychotics<br><input type="checkbox"/> Haloperidol <input type="checkbox"/> Quetiapine <input type="checkbox"/> | <input type="checkbox"/> Visual impairment<br><input type="checkbox"/> Hearing impairment<br>STOPBANG score _____<br><b>Chronic Medications</b><br><input type="checkbox"/> Benzodiazepine<br><input type="checkbox"/> Statin<br><input type="checkbox"/> Tramadol <input type="checkbox"/> Oxynorm <input type="checkbox"/><br>Anti-depressants<br><input type="checkbox"/> Tricyclics <input type="checkbox"/> SSRI <input type="checkbox"/> SNRI <input type="checkbox"/> MOAI<br><input type="checkbox"/><br>Anti-psychotics<br><input type="checkbox"/> Haloperidol <input type="checkbox"/> Quetiapine <input type="checkbox"/> |
| <b>MSK</b><br><input type="checkbox"/> Rheumatologic disease                                                                                                                                                                                                                                                                                                                                                                                                                       | <input type="checkbox"/> CVA<br><input type="checkbox"/> Parkinson Disease<br><input type="checkbox"/> Depression<br><input type="checkbox"/> Anxiety<br><input type="checkbox"/> Schizophrenia and other delusional disorders                                                                                                                                                  | <input type="checkbox"/> Visual impairment<br><input type="checkbox"/> Hearing impairment<br>STOPBANG score _____<br><b>Chronic Medications</b><br><input type="checkbox"/> Benzodiazepine<br><input type="checkbox"/> Statin<br><input type="checkbox"/> Tramadol <input type="checkbox"/> Oxynorm <input type="checkbox"/><br>Anti-depressants<br><input type="checkbox"/> Tricyclics <input type="checkbox"/> SSRI <input type="checkbox"/> SNRI <input type="checkbox"/> MOAI<br><input type="checkbox"/><br>Anti-psychotics<br><input type="checkbox"/> Haloperidol <input type="checkbox"/> Quetiapine <input type="checkbox"/> | <input type="checkbox"/> Visual impairment<br><input type="checkbox"/> Hearing impairment<br>STOPBANG score _____<br><b>Chronic Medications</b><br><input type="checkbox"/> Benzodiazepine<br><input type="checkbox"/> Statin<br><input type="checkbox"/> Tramadol <input type="checkbox"/> Oxynorm <input type="checkbox"/><br>Anti-depressants<br><input type="checkbox"/> Tricyclics <input type="checkbox"/> SSRI <input type="checkbox"/> SNRI <input type="checkbox"/> MOAI<br><input type="checkbox"/><br>Anti-psychotics<br><input type="checkbox"/> Haloperidol <input type="checkbox"/> Quetiapine <input type="checkbox"/> |
| <b>GI</b><br><input type="checkbox"/> Peptic ulcer disease<br><input type="checkbox"/> Mild liver disease<br><input type="checkbox"/> Moderate or severe liver disease                                                                                                                                                                                                                                                                                                             | <input type="checkbox"/> CVA<br><input type="checkbox"/> Parkinson Disease<br><input type="checkbox"/> Depression<br><input type="checkbox"/> Anxiety<br><input type="checkbox"/> Schizophrenia and other delusional disorders                                                                                                                                                  | <input type="checkbox"/> Visual impairment<br><input type="checkbox"/> Hearing impairment<br>STOPBANG score _____<br><b>Chronic Medications</b><br><input type="checkbox"/> Benzodiazepine<br><input type="checkbox"/> Statin<br><input type="checkbox"/> Tramadol <input type="checkbox"/> Oxynorm <input type="checkbox"/><br>Anti-depressants<br><input type="checkbox"/> Tricyclics <input type="checkbox"/> SSRI <input type="checkbox"/> SNRI <input type="checkbox"/> MOAI<br><input type="checkbox"/><br>Anti-psychotics<br><input type="checkbox"/> Haloperidol <input type="checkbox"/> Quetiapine <input type="checkbox"/> | <input type="checkbox"/> Visual impairment<br><input type="checkbox"/> Hearing impairment<br>STOPBANG score _____<br><b>Chronic Medications</b><br><input type="checkbox"/> Benzodiazepine<br><input type="checkbox"/> Statin<br><input type="checkbox"/> Tramadol <input type="checkbox"/> Oxynorm <input type="checkbox"/><br>Anti-depressants<br><input type="checkbox"/> Tricyclics <input type="checkbox"/> SSRI <input type="checkbox"/> SNRI <input type="checkbox"/> MOAI<br><input type="checkbox"/><br>Anti-psychotics<br><input type="checkbox"/> Haloperidol <input type="checkbox"/> Quetiapine <input type="checkbox"/> |
| <b>Endocrine</b><br><input type="checkbox"/> Diabetes without chronic complications<br><input type="checkbox"/> Diabetes with chronic                                                                                                                                                                                                                                                                                                                                              | <input type="checkbox"/> CVA<br><input type="checkbox"/> Parkinson Disease<br><input type="checkbox"/> Depression<br><input type="checkbox"/> Anxiety<br><input type="checkbox"/> Schizophrenia and other delusional disorders                                                                                                                                                  | <input type="checkbox"/> Visual impairment<br><input type="checkbox"/> Hearing impairment<br>STOPBANG score _____<br><b>Chronic Medications</b><br><input type="checkbox"/> Benzodiazepine<br><input type="checkbox"/> Statin<br><input type="checkbox"/> Tramadol <input type="checkbox"/> Oxynorm <input type="checkbox"/><br>Anti-depressants<br><input type="checkbox"/> Tricyclics <input type="checkbox"/> SSRI <input type="checkbox"/> SNRI <input type="checkbox"/> MOAI<br><input type="checkbox"/><br>Anti-psychotics<br><input type="checkbox"/> Haloperidol <input type="checkbox"/> Quetiapine <input type="checkbox"/> | <input type="checkbox"/> Visual impairment<br><input type="checkbox"/> Hearing impairment<br>STOPBANG score _____<br><b>Chronic Medications</b><br><input type="checkbox"/> Benzodiazepine<br><input type="checkbox"/> Statin<br><input type="checkbox"/> Tramadol <input type="checkbox"/> Oxynorm <input type="checkbox"/><br>Anti-depressants<br><input type="checkbox"/> Tricyclics <input type="checkbox"/> SSRI <input type="checkbox"/> SNRI <input type="checkbox"/> MOAI<br><input type="checkbox"/><br>Anti-psychotics<br><input type="checkbox"/> Haloperidol <input type="checkbox"/> Quetiapine <input type="checkbox"/> |

| <p><b>Renal</b></p> <p><input type="checkbox"/></p> <p><input type="checkbox"/></p> <p><b>Malignancy</b></p> <p><input type="checkbox"/></p> <p><input type="checkbox"/></p> <p><input type="checkbox"/></p> <p><b>Immunological</b></p> <p><input type="checkbox"/></p>                                                                                                                                                                                                                                                                                                                                                                                                                                                                                                                                                                                                                                                                                                                                                                                                                                                                                                                                                                                                                                                                                                                                                                                                                                                                                                                                                                                                                                                                                                                                                                                                                                                                                                                                                          | <p>complications</p> <hr/> <p>Mild Renal disease</p> <p>Moderate or severe renal disease</p> <hr/> <p>Any malignancy, including leukemia and lymphoma</p> <p>Non-metastatic solid tumour</p> <p>Metastatic solid tumor</p> <hr/> <p>AIDS/HIV</p> | <p>Olanzapine <input type="checkbox"/> Clozapine <input type="checkbox"/></p> <p><b>Preoperative Laboratory Results</b></p> <p>Hemoglobin _____</p> <p>MCV _____</p> <p>RDW _____</p> <p>MCV _____</p> <p>MCHC _____</p> <p>Urea _____</p> |            |           |             |                          |                          |            |                          |                          |               |                          |                          |            |                          |                          |                             |  |  |          |                          |                          |                             |  |  |                   |                          |                          |              |                          |                          |                   |                          |                          |             |                          |                          |                                |  |  |  |
|-----------------------------------------------------------------------------------------------------------------------------------------------------------------------------------------------------------------------------------------------------------------------------------------------------------------------------------------------------------------------------------------------------------------------------------------------------------------------------------------------------------------------------------------------------------------------------------------------------------------------------------------------------------------------------------------------------------------------------------------------------------------------------------------------------------------------------------------------------------------------------------------------------------------------------------------------------------------------------------------------------------------------------------------------------------------------------------------------------------------------------------------------------------------------------------------------------------------------------------------------------------------------------------------------------------------------------------------------------------------------------------------------------------------------------------------------------------------------------------------------------------------------------------------------------------------------------------------------------------------------------------------------------------------------------------------------------------------------------------------------------------------------------------------------------------------------------------------------------------------------------------------------------------------------------------------------------------------------------------------------------------------------------------|--------------------------------------------------------------------------------------------------------------------------------------------------------------------------------------------------------------------------------------------------|--------------------------------------------------------------------------------------------------------------------------------------------------------------------------------------------------------------------------------------------|------------|-----------|-------------|--------------------------|--------------------------|------------|--------------------------|--------------------------|---------------|--------------------------|--------------------------|------------|--------------------------|--------------------------|-----------------------------|--|--|----------|--------------------------|--------------------------|-----------------------------|--|--|-------------------|--------------------------|--------------------------|--------------|--------------------------|--------------------------|-------------------|--------------------------|--------------------------|-------------|--------------------------|--------------------------|--------------------------------|--|--|--|
| <p><b>IntraOp</b></p> <p>ANA Type: _____</p> <table border="1" style="width: 100%; border-collapse: collapse; margin-top: 10px;"> <thead> <tr> <th style="width: 70%;"></th> <th style="width: 15%; text-align: center;"><b>Yes</b></th> <th style="width: 15%; text-align: center;"><b>No</b></th> </tr> </thead> <tbody> <tr> <td>Fem N block</td> <td style="text-align: center;"><input type="checkbox"/></td> <td style="text-align: center;"><input type="checkbox"/></td> </tr> <tr> <td>Benzo Use:</td> <td style="text-align: center;"><input type="checkbox"/></td> <td style="text-align: center;"><input type="checkbox"/></td> </tr> <tr> <td>Atropine Use:</td> <td style="text-align: center;"><input type="checkbox"/></td> <td style="text-align: center;"><input type="checkbox"/></td> </tr> <tr> <td>Opioid use</td> <td style="text-align: center;"><input type="checkbox"/></td> <td style="text-align: center;"><input type="checkbox"/></td> </tr> <tr> <td><b>If yes , dose: _____</b></td> <td></td> <td></td> </tr> <tr> <td>Dexa use</td> <td style="text-align: center;"><input type="checkbox"/></td> <td style="text-align: center;"><input type="checkbox"/></td> </tr> <tr> <td><b>If yes , dose: _____</b></td> <td></td> <td></td> </tr> <tr> <td>Promethazine use:</td> <td style="text-align: center;"><input type="checkbox"/></td> <td style="text-align: center;"><input type="checkbox"/></td> </tr> <tr> <td>Ondansetron:</td> <td style="text-align: center;"><input type="checkbox"/></td> <td style="text-align: center;"><input type="checkbox"/></td> </tr> <tr> <td>Blood Transfusion</td> <td style="text-align: center;"><input type="checkbox"/></td> <td style="text-align: center;"><input type="checkbox"/></td> </tr> <tr> <td>Hypotension</td> <td style="text-align: center;"><input type="checkbox"/></td> <td style="text-align: center;"><input type="checkbox"/></td> </tr> <tr> <td><b>If yes, duration: _____</b></td> <td></td> <td></td> </tr> </tbody> </table> |                                                                                                                                                                                                                                                  |                                                                                                                                                                                                                                            | <b>Yes</b> | <b>No</b> | Fem N block | <input type="checkbox"/> | <input type="checkbox"/> | Benzo Use: | <input type="checkbox"/> | <input type="checkbox"/> | Atropine Use: | <input type="checkbox"/> | <input type="checkbox"/> | Opioid use | <input type="checkbox"/> | <input type="checkbox"/> | <b>If yes , dose: _____</b> |  |  | Dexa use | <input type="checkbox"/> | <input type="checkbox"/> | <b>If yes , dose: _____</b> |  |  | Promethazine use: | <input type="checkbox"/> | <input type="checkbox"/> | Ondansetron: | <input type="checkbox"/> | <input type="checkbox"/> | Blood Transfusion | <input type="checkbox"/> | <input type="checkbox"/> | Hypotension | <input type="checkbox"/> | <input type="checkbox"/> | <b>If yes, duration: _____</b> |  |  |  |
|                                                                                                                                                                                                                                                                                                                                                                                                                                                                                                                                                                                                                                                                                                                                                                                                                                                                                                                                                                                                                                                                                                                                                                                                                                                                                                                                                                                                                                                                                                                                                                                                                                                                                                                                                                                                                                                                                                                                                                                                                                   | <b>Yes</b>                                                                                                                                                                                                                                       | <b>No</b>                                                                                                                                                                                                                                  |            |           |             |                          |                          |            |                          |                          |               |                          |                          |            |                          |                          |                             |  |  |          |                          |                          |                             |  |  |                   |                          |                          |              |                          |                          |                   |                          |                          |             |                          |                          |                                |  |  |  |
| Fem N block                                                                                                                                                                                                                                                                                                                                                                                                                                                                                                                                                                                                                                                                                                                                                                                                                                                                                                                                                                                                                                                                                                                                                                                                                                                                                                                                                                                                                                                                                                                                                                                                                                                                                                                                                                                                                                                                                                                                                                                                                       | <input type="checkbox"/>                                                                                                                                                                                                                         | <input type="checkbox"/>                                                                                                                                                                                                                   |            |           |             |                          |                          |            |                          |                          |               |                          |                          |            |                          |                          |                             |  |  |          |                          |                          |                             |  |  |                   |                          |                          |              |                          |                          |                   |                          |                          |             |                          |                          |                                |  |  |  |
| Benzo Use:                                                                                                                                                                                                                                                                                                                                                                                                                                                                                                                                                                                                                                                                                                                                                                                                                                                                                                                                                                                                                                                                                                                                                                                                                                                                                                                                                                                                                                                                                                                                                                                                                                                                                                                                                                                                                                                                                                                                                                                                                        | <input type="checkbox"/>                                                                                                                                                                                                                         | <input type="checkbox"/>                                                                                                                                                                                                                   |            |           |             |                          |                          |            |                          |                          |               |                          |                          |            |                          |                          |                             |  |  |          |                          |                          |                             |  |  |                   |                          |                          |              |                          |                          |                   |                          |                          |             |                          |                          |                                |  |  |  |
| Atropine Use:                                                                                                                                                                                                                                                                                                                                                                                                                                                                                                                                                                                                                                                                                                                                                                                                                                                                                                                                                                                                                                                                                                                                                                                                                                                                                                                                                                                                                                                                                                                                                                                                                                                                                                                                                                                                                                                                                                                                                                                                                     | <input type="checkbox"/>                                                                                                                                                                                                                         | <input type="checkbox"/>                                                                                                                                                                                                                   |            |           |             |                          |                          |            |                          |                          |               |                          |                          |            |                          |                          |                             |  |  |          |                          |                          |                             |  |  |                   |                          |                          |              |                          |                          |                   |                          |                          |             |                          |                          |                                |  |  |  |
| Opioid use                                                                                                                                                                                                                                                                                                                                                                                                                                                                                                                                                                                                                                                                                                                                                                                                                                                                                                                                                                                                                                                                                                                                                                                                                                                                                                                                                                                                                                                                                                                                                                                                                                                                                                                                                                                                                                                                                                                                                                                                                        | <input type="checkbox"/>                                                                                                                                                                                                                         | <input type="checkbox"/>                                                                                                                                                                                                                   |            |           |             |                          |                          |            |                          |                          |               |                          |                          |            |                          |                          |                             |  |  |          |                          |                          |                             |  |  |                   |                          |                          |              |                          |                          |                   |                          |                          |             |                          |                          |                                |  |  |  |
| <b>If yes , dose: _____</b>                                                                                                                                                                                                                                                                                                                                                                                                                                                                                                                                                                                                                                                                                                                                                                                                                                                                                                                                                                                                                                                                                                                                                                                                                                                                                                                                                                                                                                                                                                                                                                                                                                                                                                                                                                                                                                                                                                                                                                                                       |                                                                                                                                                                                                                                                  |                                                                                                                                                                                                                                            |            |           |             |                          |                          |            |                          |                          |               |                          |                          |            |                          |                          |                             |  |  |          |                          |                          |                             |  |  |                   |                          |                          |              |                          |                          |                   |                          |                          |             |                          |                          |                                |  |  |  |
| Dexa use                                                                                                                                                                                                                                                                                                                                                                                                                                                                                                                                                                                                                                                                                                                                                                                                                                                                                                                                                                                                                                                                                                                                                                                                                                                                                                                                                                                                                                                                                                                                                                                                                                                                                                                                                                                                                                                                                                                                                                                                                          | <input type="checkbox"/>                                                                                                                                                                                                                         | <input type="checkbox"/>                                                                                                                                                                                                                   |            |           |             |                          |                          |            |                          |                          |               |                          |                          |            |                          |                          |                             |  |  |          |                          |                          |                             |  |  |                   |                          |                          |              |                          |                          |                   |                          |                          |             |                          |                          |                                |  |  |  |
| <b>If yes , dose: _____</b>                                                                                                                                                                                                                                                                                                                                                                                                                                                                                                                                                                                                                                                                                                                                                                                                                                                                                                                                                                                                                                                                                                                                                                                                                                                                                                                                                                                                                                                                                                                                                                                                                                                                                                                                                                                                                                                                                                                                                                                                       |                                                                                                                                                                                                                                                  |                                                                                                                                                                                                                                            |            |           |             |                          |                          |            |                          |                          |               |                          |                          |            |                          |                          |                             |  |  |          |                          |                          |                             |  |  |                   |                          |                          |              |                          |                          |                   |                          |                          |             |                          |                          |                                |  |  |  |
| Promethazine use:                                                                                                                                                                                                                                                                                                                                                                                                                                                                                                                                                                                                                                                                                                                                                                                                                                                                                                                                                                                                                                                                                                                                                                                                                                                                                                                                                                                                                                                                                                                                                                                                                                                                                                                                                                                                                                                                                                                                                                                                                 | <input type="checkbox"/>                                                                                                                                                                                                                         | <input type="checkbox"/>                                                                                                                                                                                                                   |            |           |             |                          |                          |            |                          |                          |               |                          |                          |            |                          |                          |                             |  |  |          |                          |                          |                             |  |  |                   |                          |                          |              |                          |                          |                   |                          |                          |             |                          |                          |                                |  |  |  |
| Ondansetron:                                                                                                                                                                                                                                                                                                                                                                                                                                                                                                                                                                                                                                                                                                                                                                                                                                                                                                                                                                                                                                                                                                                                                                                                                                                                                                                                                                                                                                                                                                                                                                                                                                                                                                                                                                                                                                                                                                                                                                                                                      | <input type="checkbox"/>                                                                                                                                                                                                                         | <input type="checkbox"/>                                                                                                                                                                                                                   |            |           |             |                          |                          |            |                          |                          |               |                          |                          |            |                          |                          |                             |  |  |          |                          |                          |                             |  |  |                   |                          |                          |              |                          |                          |                   |                          |                          |             |                          |                          |                                |  |  |  |
| Blood Transfusion                                                                                                                                                                                                                                                                                                                                                                                                                                                                                                                                                                                                                                                                                                                                                                                                                                                                                                                                                                                                                                                                                                                                                                                                                                                                                                                                                                                                                                                                                                                                                                                                                                                                                                                                                                                                                                                                                                                                                                                                                 | <input type="checkbox"/>                                                                                                                                                                                                                         | <input type="checkbox"/>                                                                                                                                                                                                                   |            |           |             |                          |                          |            |                          |                          |               |                          |                          |            |                          |                          |                             |  |  |          |                          |                          |                             |  |  |                   |                          |                          |              |                          |                          |                   |                          |                          |             |                          |                          |                                |  |  |  |
| Hypotension                                                                                                                                                                                                                                                                                                                                                                                                                                                                                                                                                                                                                                                                                                                                                                                                                                                                                                                                                                                                                                                                                                                                                                                                                                                                                                                                                                                                                                                                                                                                                                                                                                                                                                                                                                                                                                                                                                                                                                                                                       | <input type="checkbox"/>                                                                                                                                                                                                                         | <input type="checkbox"/>                                                                                                                                                                                                                   |            |           |             |                          |                          |            |                          |                          |               |                          |                          |            |                          |                          |                             |  |  |          |                          |                          |                             |  |  |                   |                          |                          |              |                          |                          |                   |                          |                          |             |                          |                          |                                |  |  |  |
| <b>If yes, duration: _____</b>                                                                                                                                                                                                                                                                                                                                                                                                                                                                                                                                                                                                                                                                                                                                                                                                                                                                                                                                                                                                                                                                                                                                                                                                                                                                                                                                                                                                                                                                                                                                                                                                                                                                                                                                                                                                                                                                                                                                                                                                    |                                                                                                                                                                                                                                                  |                                                                                                                                                                                                                                            |            |           |             |                          |                          |            |                          |                          |               |                          |                          |            |                          |                          |                             |  |  |          |                          |                          |                             |  |  |                   |                          |                          |              |                          |                          |                   |                          |                          |             |                          |                          |                                |  |  |  |
| <p><b>BASELINE CAM</b></p> <ol style="list-style-type: none"> <li>1. Acute onset change in mental status from baseline?             <ol style="list-style-type: none"> <li>a. Yes <input type="checkbox"/></li> <li>b. No <input type="checkbox"/></li> <li>c. Uncertain _____</li> </ol> </li> <li>2. Does the patient have difficulty focusing attention, is easily distracted, or has difficulty keeping track of what was being said?             <ol style="list-style-type: none"> <li>a. Yes – mild form <input type="checkbox"/>, fluctuating <input type="checkbox"/></li> <li>b. Yes – marked form <input type="checkbox"/>, fluctuating <input type="checkbox"/></li> <li>c. Uncertain _____</li> <li>d. No <input type="checkbox"/></li> </ol> </li> <li>3. Was the patient’s thinking disorganized or incoherent, such as rambling or irrelevant conversation, unclear or illogical flow of ideas, or unpredictable switching from subject to subject?             <ol style="list-style-type: none"> <li>a. Yes – mild form <input type="checkbox"/>, fluctuating <input type="checkbox"/></li> <li>b. Yes – marked form <input type="checkbox"/>, fluctuating <input type="checkbox"/></li> </ol> </li> </ol>                                                                                                                                                                                                                                                                                                                                                                                                                                                                                                                                                                                                                                                                                                                                                                                                      |                                                                                                                                                                                                                                                  |                                                                                                                                                                                                                                            |            |           |             |                          |                          |            |                          |                          |               |                          |                          |            |                          |                          |                             |  |  |          |                          |                          |                             |  |  |                   |                          |                          |              |                          |                          |                   |                          |                          |             |                          |                          |                                |  |  |  |



- c. Uncertain \_\_\_\_\_
- d. No
4. How is the patient's overall level of consciousness?
- a. Alert (normal)
- b. Vigilant (hyperalert, overly sensitive to environmental stimuli, startled easily) ,  
fluctuating
- c. Lethargic (Drowsy, easily aroused) , fluctuating
- d. Stupor (Difficult to arouse) , fluctuating
- e. Coma (Unarousable) , fluctuating
- f. Uncertain \_\_\_\_\_

#### BASELINE MINI MENTAL STATE EXAMINATION

Total score \_\_\_\_\_

Level of consciousness

Alert  Drowsy  Stupor  Coma

|                        | Question                                                                                                                                                                                                                                                        | Score                           |
|------------------------|-----------------------------------------------------------------------------------------------------------------------------------------------------------------------------------------------------------------------------------------------------------------|---------------------------------|
| 1                      | What is the <ul style="list-style-type: none"> <li>• year</li> <li>• month</li> <li>• day of the week</li> <li>• date</li> <li>• current time now (without looking at your watch)?</li> </ul>                                                                   | / 5                             |
| 2                      | What country are we in?<br>What area/street are we in?<br>Which part of Singapore is this place (North, south, east, west or central)?<br>Which hospital are we in?<br>Which floor?                                                                             | / 5                             |
| 3                      | Show the objects: ball, flag, tree<br><br>Name 3 objects: 1 second to say each. Then ask the patient all 3 after you have said them. Give 1 point for each correct answer. Then repeat them until he/she learns all 3. Count trials and record.<br>Trials _____ | / 3                             |
| 4                      | Serial 7's. 1 point for each correct answer. Stop after 5 answers.<br>Alternatively spell "world" backward.                                                                                                                                                     | / 5                             |
| 5                      | Ask for the 3 objects repeated above. Give 1 point for each correct answer.                                                                                                                                                                                     | / 3                             |
| 6                      | Name a pencil and watch.<br>Repeat the following "No ifs, ands, or buts"<br>Follow a 3-stage command:<br>"Take a paper in your hand, fold it in half, and put it on the floor."<br>Read and obey the following:                                                 | / 2<br>/ 1<br>/ 3<br>/ 1<br>/ 1 |
| <b>CLOSE YOUR EYES</b> |                                                                                                                                                                                                                                                                 |                                 |

|  |                                                                                                                                                                                                                                                                                                                                                                                                                                                                                                 |                                                                                   |
|--|-------------------------------------------------------------------------------------------------------------------------------------------------------------------------------------------------------------------------------------------------------------------------------------------------------------------------------------------------------------------------------------------------------------------------------------------------------------------------------------------------|-----------------------------------------------------------------------------------|
|  | <p data-bbox="370 184 574 212">Write a sentence.</p> <p data-bbox="370 247 634 275">Copy the design shown</p> 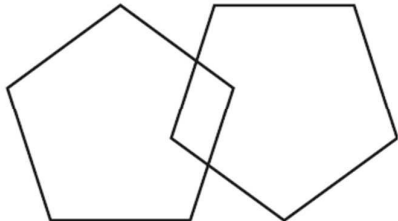 The image shows two regular pentagons. The left pentagon is oriented with one vertex pointing upwards. The right pentagon is oriented with one vertex pointing downwards. They overlap in the center, with the right side of the left pentagon overlapping the left side of the right pentagon. | <p data-bbox="1263 184 1305 212">/ 1</p> <p data-bbox="1263 386 1305 413">/ 1</p> |
|--|-------------------------------------------------------------------------------------------------------------------------------------------------------------------------------------------------------------------------------------------------------------------------------------------------------------------------------------------------------------------------------------------------------------------------------------------------------------------------------------------------|-----------------------------------------------------------------------------------|

For peer review only

## Appendix 2 – Postoperative DCF

### Postoperative Delirium Following Total Joint Arthroplasties among South East Asians

|                                                                                                   |             |
|---------------------------------------------------------------------------------------------------|-------------|
| Serial No: _____<br>Date of surgery: _____<br>Type of surgery: _____<br>Date of assessment: _____ | <b>POD1</b> |
|---------------------------------------------------------------------------------------------------|-------------|

#### CAM ASSESSMENT

5. Acute onset change in mental status from baseline?
  - a. Yes
  - b. No
  - c. Uncertain \_\_\_\_\_
6. Does the patient have difficulty focusing attention, is easily distracted, or has difficulty keeping track of what was being said?
  - a. Yes – mild form , fluctuating
  - b. Yes – marked form , fluctuating
  - c. Uncertain \_\_\_\_\_
  - d. No
7. Was the patient's thinking disorganized or incoherent, such as rambling or irrelevant conversation, unclear or illogical flow of ideas, or unpredictable switching from subject to subject?
  - a. Yes – mild form , fluctuating
  - b. Yes – marked form , fluctuating
  - c. Uncertain \_\_\_\_\_
  - d. No
8. How is the patient's overall level of consciousness?
  - a. Alert (normal)
  - b. Vigilant (hyperalert, overly sensitive to environmental stimuli, startled easily) , fluctuating
  - c. Lethargic (Drowsy, easily aroused) , fluctuating
  - d. Stupor (Difficult to arouse) , fluctuating
  - e. Coma (Unarousable) , fluctuating
  - f. Uncertain \_\_\_\_\_

#### PAIN ASSESSMENT

VAS score at time of assessment (0 – 10): \_\_\_\_\_

#### VISUAL/HEARING IMPAIRMENT

- Visually impaired
- Hearing impaired
- If yes to above, hearing aids?

#### PERIOPERATIVE DETAILS

- Tourniquet time: \_\_\_\_\_ minutes
- Intra-articular injections:
- (i) Tranexamic acid  Dosage: \_\_\_\_\_
  - (ii) Morphine  Dosage: \_\_\_\_\_

|  |                                                       |
|--|-------------------------------------------------------|
|  | (iii) Marcaine <input type="checkbox"/> Dosage:       |
|  | (iv) Adrenaline <input type="checkbox"/> Dosage:      |
|  | (v) Ketorolac <input type="checkbox"/> Dosage:        |
|  | (vi) Triamcinolone <input type="checkbox"/> Dosage:   |
|  | (vii) Vancomycin <input type="checkbox"/> Dosage:     |
|  | (viii) Normal Saline <input type="checkbox"/> Dosage: |
|  | (ix) Others: _____                                    |

For peer review only

## Postoperative Delirium Following Total Joint Arthroplasties among South East Asians

Serial No: \_\_\_\_\_

# POD2

Date of surgery: \_\_\_\_\_

Type of surgery: \_\_\_\_\_

Date of assessment: \_\_\_\_\_

### CAM ASSESSMENT

9. Acute onset change in mental status from baseline?
- Yes
  - No
  - Uncertain \_\_\_\_\_
10. Does the patient have difficulty focusing attention, is easily distracted, or has difficulty keeping track of what was being said?
- Yes – mild form , fluctuating
  - Yes – marked form , fluctuating
  - Uncertain \_\_\_\_\_
  - No
11. Was the patient's thinking disorganized or incoherent, such as rambling or irrelevant conversation, unclear or illogical flow of ideas, or unpredictable switching from subject to subject?
- Yes – mild form , fluctuating
  - Yes – marked form , fluctuating
  - Uncertain \_\_\_\_\_
  - No
12. How is the patient's overall level of consciousness?
- Alert (normal)
  - Vigilant (hyperalert, overly sensitive to environmental stimuli, startled easily) , fluctuating
  - Lethargic (Drowsy, easily aroused) , fluctuating
  - Stupor (Difficult to arouse) , fluctuating
  - Coma (Unarousable) , fluctuating
  - Uncertain \_\_\_\_\_

### PAIN ASSESSMENT

VAS score at time of assessment (0 – 10): \_\_\_\_\_

## Postoperative Delirium Following Total Joint Arthroplasties among South East Asians

Serial No: \_\_\_\_\_

Date of surgery: \_\_\_\_\_

Type of surgery: \_\_\_\_\_

Date of assessment: \_\_\_\_\_

# POD3

### CAM ASSESSMENT

1. Acute onset change in mental status from baseline?
  - a. Yes
  - b. No
  - c. Uncertain \_\_\_\_\_
2. Does the patient have difficulty focusing attention, is easily distracted, or has difficulty keeping track of what was being said?
  - a. Yes – mild form , fluctuating
  - b. Yes – marked form , fluctuating
  - c. Uncertain \_\_\_\_\_
  - d. No
3. Was the patient's thinking disorganized or incoherent, such as rambling or irrelevant conversation, unclear or illogical flow of ideas, or unpredictable switching from subject to subject?
  - a. Yes – mild form , fluctuating
  - b. Yes – marked form , fluctuating
  - c. Uncertain \_\_\_\_\_
  - d. No
4. How is the patient's overall level of consciousness?
  - a. Alert (normal)
  - b. Vigilant (hyperalert, overly sensitive to environmental stimuli, startled easily) , fluctuating
  - c. Lethargic (Drowsy, easily aroused) , fluctuating
  - d. Stupor (Difficult to arouse) , fluctuating
  - e. Coma (Unarousable) , fluctuating
  - f. Uncertain \_\_\_\_\_

### PAIN ASSESSMENT

VAS score at time of assessment (0 – 10): \_\_\_\_\_

| Postoperative Delirium Following Total Joint Arthroplasties among South East Asians |                                                                                                                                                                                                                                                                   |                     |
|-------------------------------------------------------------------------------------|-------------------------------------------------------------------------------------------------------------------------------------------------------------------------------------------------------------------------------------------------------------------|---------------------|
| Serial No: _____                                                                    | <h1>DAY OF DISCHARGE</h1>                                                                                                                                                                                                                                         |                     |
| Date of surgery: _____                                                              |                                                                                                                                                                                                                                                                   |                     |
| Type of surgery: _____                                                              |                                                                                                                                                                                                                                                                   |                     |
| Date of assessment: _____                                                           |                                                                                                                                                                                                                                                                   |                     |
| POSTOPERATIVE MORBIDITY SURGERY                                                     |                                                                                                                                                                                                                                                                   |                     |
| Morbidity Type                                                                      | Criteria                                                                                                                                                                                                                                                          | Tick if present (□) |
| Pulmonary                                                                           | De novo requirement for supplemental oxygen or other respiratory support (e.g. mechanical ventilation or CPAP)                                                                                                                                                    |                     |
| Infectious                                                                          | Currently on antibiotics or temperature > 38°C in the last 24h                                                                                                                                                                                                    |                     |
| Renal                                                                               | Presence of oliguria (< 500 ml/day), elevated serum creatinine (> 30% from preoperative value), or urinary catheter in place for a nonsurgical reason                                                                                                             |                     |
| Gastrointestinal                                                                    | Unable to tolerate an enteral diet (either by mouth or via a feeding tube) for any reason, including nausea, vomiting, and abdominal distension                                                                                                                   |                     |
| Cardiovascular                                                                      | Diagnostic tests or therapy within the last 24h for any of the following: de novo myocardial infarction or ischaemia, hypotension (requiring pharmacologic therapy or fluid therapy > 200ml/h), atrial or ventricular arrhythmias, or cardiogenic pulmonary edema |                     |
| Neurologic                                                                          | Presence of a de novo focal deficit, coma or confusion and delirium                                                                                                                                                                                               |                     |
| Wound complication                                                                  | Wound dehiscence requiring surgical exploration or drainage of pus from the operation wound, with or without isolation of organisms                                                                                                                               |                     |
| Haematologic                                                                        | Requirement for any of the following within the last 24h: packed erythrocytes, platelets, fresh-frozen plasma, or cryoprecipitate                                                                                                                                 |                     |
| Pain                                                                                | Surgical wound pain significant enough to require parenteral opiates or regional analgesia                                                                                                                                                                        |                     |

CPAP: continuous positive airway pressure

### Appendix 3 – Postoperative Morbidity Survey

| Morbidity type   | Criteria                                                                                                                                                                                                                                                                                                      | Source of data      |
|------------------|---------------------------------------------------------------------------------------------------------------------------------------------------------------------------------------------------------------------------------------------------------------------------------------------------------------|---------------------|
| Pulmonary        | Has the patient developed a new requirement for oxygen or respiratory support.                                                                                                                                                                                                                                | Patient observation |
|                  |                                                                                                                                                                                                                                                                                                               | Treatment chart     |
| Infectious       | Currently on antibiotics and/or has had a temperature of >38°C in the last 24 hr.                                                                                                                                                                                                                             | Treatment chart     |
|                  |                                                                                                                                                                                                                                                                                                               | Observation chart   |
| Renal            | Presence of oliguria <500 mL/24 hr; increased serum creatinine (>30% from preoperative level); urinary catheter in situ.                                                                                                                                                                                      | Fluid balance chart |
|                  |                                                                                                                                                                                                                                                                                                               | Biochemistry result |
|                  |                                                                                                                                                                                                                                                                                                               | Patient observation |
| Gastrointestinal | Unable to tolerate an enteral diet for any reason including nausea, vomiting, and abdominal distension (use of antiemetic).                                                                                                                                                                                   | Patient questioning |
|                  |                                                                                                                                                                                                                                                                                                               | Fluid balance chart |
|                  |                                                                                                                                                                                                                                                                                                               | Treatment chart     |
| Cardiovascular   | Diagnostic tests or therapy within the last 24 hr for any of the following: new myocardial infarction or ischemia, hypotension (requiring fluid therapy >200 mL/hr or pharmacological therapy), atrial or ventricular arrhythmias, cardiogenic pulmonary edema, thrombotic event (requiring anticoagulation). | Treatment chart     |
|                  |                                                                                                                                                                                                                                                                                                               | Note review         |
| Neurological     | New focal neurological deficit, confusion, delirium, or coma.                                                                                                                                                                                                                                                 | Note review         |
|                  |                                                                                                                                                                                                                                                                                                               | Patient questioning |
| Hematological    | Requirement for any of the following within the last 24 hr: packed erythrocytes, platelets, fresh-frozen plasma, or cryoprecipitate.                                                                                                                                                                          | Treatment chart     |
|                  |                                                                                                                                                                                                                                                                                                               | Fluid balance chart |
| Wound            | Wound dehiscence requiring surgical exploration or drainage of pus from the operation wound with or without isolation of organisms.                                                                                                                                                                           | Note review         |
|                  |                                                                                                                                                                                                                                                                                                               | Pathology result    |
| Pain             | New postoperative pain significant enough to require parenteral opioids or regional analgesia.                                                                                                                                                                                                                | Treatment chart     |
|                  |                                                                                                                                                                                                                                                                                                               | Patient questioning |



## Appendix 4 – 36-Item Short Form Health Survey

### RAND 36-Item Health Survey 1.0 Questionnaire Items

Choose one option for each questionnaire item.

1. In general, would you say your health is:
  - 1 – Excellent
  - 2 - Very good
  - 3 – Good
  - 4 – Fair
  - 5 – Poor
  
2. **Compared to one year ago**, how would you rate your health in general now?
  - 1 - Much better now than one year ago
  - 2 - Somewhat better now than one year ago
  - 3 - About the same
  - 4 - Somewhat worse now than one year ago
  - 5 - Much worse now than one year ago

The following items are about activities you might do during a typical day. Does **your health now limit you** in these activities? If so, how much?

- |                                                                                                            | Yes,<br>limited a<br>lot | Yes,<br>limited a<br>little | No, not<br>limited at<br>all |
|------------------------------------------------------------------------------------------------------------|--------------------------|-----------------------------|------------------------------|
| 3. <b>Vigorous activities</b> , such as running, lifting heavy objects, participating in strenuous sports  | <input type="radio"/> 1  | <input type="radio"/> 2     | <input type="radio"/> 3      |
| 4. <b>Moderate activities</b> , such as moving a table, pushing a vacuum cleaner, bowling, or playing golf | <input type="radio"/> 1  | <input type="radio"/> 2     | <input type="radio"/> 3      |
| 5. Lifting or carrying groceries                                                                           | <input type="radio"/> 1  | <input type="radio"/> 2     | <input type="radio"/> 3      |
| 6. Climbing <b>several</b> flights of stairs                                                               | <input type="radio"/> 1  | <input type="radio"/> 2     | <input type="radio"/> 3      |
| 7. Climbing <b>one</b> flight of stairs                                                                    | <input type="radio"/> 1  | <input type="radio"/> 2     | <input type="radio"/> 3      |
| 8. Bending, kneeling, or stooping                                                                          | <input type="radio"/> 1  | <input type="radio"/> 2     | <input type="radio"/> 3      |
| 9. Walking <b>more than a mile</b>                                                                         | <input type="radio"/> 1  | <input type="radio"/> 2     | <input type="radio"/> 3      |
| 10. Walking <b>several blocks</b>                                                                          | <input type="radio"/> 1  | <input type="radio"/> 2     | <input type="radio"/> 3      |
| 11. Walking <b>one block</b>                                                                               | <input type="radio"/> 1  | <input type="radio"/> 2     | <input type="radio"/> 3      |
| 12. Bathing or dressing yourself                                                                           | <input type="radio"/> 1  | <input type="radio"/> 2     | <input type="radio"/> 3      |

1  
2  
3  
4  
5  
6  
7  
8 During the **past 4 weeks**, have you had any of the following problems with your work or other regular daily activities **as a result of your physical health**?

- |                                                                                                   | Yes                     | No                      |
|---------------------------------------------------------------------------------------------------|-------------------------|-------------------------|
| 9 13. Cut down the amount of time you spent on work or other activities                           | <input type="radio"/> 1 | <input type="radio"/> 2 |
| 10 14. Accomplished less than you would like                                                      | <input type="radio"/> 1 | <input type="radio"/> 2 |
| 11 15. Were limited in the kind of work or other activities                                       | <input type="radio"/> 1 | <input type="radio"/> 2 |
| 12 16. Had difficulty performing the work or other activities (for example, it took extra effort) | <input type="radio"/> 1 | <input type="radio"/> 2 |

13  
14  
15  
16  
17  
18  
19  
20  
21 During the **past 4 weeks**, have you had any of the following problems with your work or other regular daily activities **as a result of any emotional problems** (such as feeling depressed or anxious)?

- |                                                                                                                                                                                                  | Yes                     | No                      |
|--------------------------------------------------------------------------------------------------------------------------------------------------------------------------------------------------|-------------------------|-------------------------|
| 22 17. Cut down the <b>amount of time</b> you spent on work or other activities                                                                                                                  | <input type="radio"/> 1 | <input type="radio"/> 2 |
| 23 18. <b>Accomplished less</b> than you would like                                                                                                                                              | <input type="radio"/> 1 | <input type="radio"/> 2 |
| 24 19. Didn't do work or other activities as <b>carefully</b> as usual                                                                                                                           | <input type="radio"/> 1 | <input type="radio"/> 2 |
| 25 20. During the <b>past 4 weeks</b> , to what extent has your physical health or emotional problems interfered with your normal social activities with family, friends, neighbours, or groups? |                         |                         |
| 26 <input type="radio"/> 1 - Not at all                                                                                                                                                          |                         |                         |
| 27 <input type="radio"/> 2 - Slightly                                                                                                                                                            |                         |                         |
| 28 <input type="radio"/> 3 - Moderately                                                                                                                                                          |                         |                         |
| 29 <input type="radio"/> 4 - Quite a bit                                                                                                                                                         |                         |                         |
| 30 <input type="radio"/> 5 - Extremely                                                                                                                                                           |                         |                         |

31  
32  
33  
34  
35  
36  
37  
38  
39  
40  
41  
42 21. How much **bodily** pain have you had during the **past 4 weeks**?

- 43     1 - None
- 44     2 - Very mild
- 45     3 - Mild
- 46     4 - Moderate
- 47     5 - Severe
- 48     6 - Very severe

49  
50  
51  
52 22. During the **past 4 weeks**, how much did **pain** interfere with your normal work (including both work outside the home and housework)?

- 53     1 - Not at all
- 54     2 - A little bit

- 3 - Moderately
- 4 - Quite a bit
- 5 – Extremely

These questions are about how you feel and how things have been with you **during the past 4 weeks**. For each question, please give the one answer that comes closest to the way you have been feeling.

How much of the time during the **past 4 weeks**...

- |                                                                         | All of<br>the<br>time   | Most<br>of the<br>time  | A good<br>bit of<br>the<br>time | Some<br>of the<br>time  | A little<br>of the<br>time | None<br>of the<br>time  |
|-------------------------------------------------------------------------|-------------------------|-------------------------|---------------------------------|-------------------------|----------------------------|-------------------------|
| 23. Did you feel full of pep?                                           | <input type="radio"/> 1 | <input type="radio"/> 2 | <input type="radio"/> 3         | <input type="radio"/> 4 | <input type="radio"/> 5    | <input type="radio"/> 6 |
| 24. Have you been a very nervous person?                                | <input type="radio"/> 1 | <input type="radio"/> 2 | <input type="radio"/> 3         | <input type="radio"/> 4 | <input type="radio"/> 5    | <input type="radio"/> 6 |
| 25. Have you felt so down in the dumps that nothing could cheer you up? | <input type="radio"/> 1 | <input type="radio"/> 2 | <input type="radio"/> 3         | <input type="radio"/> 4 | <input type="radio"/> 5    | <input type="radio"/> 6 |
| 26. Have you felt calm and peaceful?                                    | <input type="radio"/> 1 | <input type="radio"/> 2 | <input type="radio"/> 3         | <input type="radio"/> 4 | <input type="radio"/> 5    | <input type="radio"/> 6 |
| 27. Did you have a lot of energy?                                       | <input type="radio"/> 1 | <input type="radio"/> 2 | <input type="radio"/> 3         | <input type="radio"/> 4 | <input type="radio"/> 5    | <input type="radio"/> 6 |
| 28. Have you felt downhearted and blue?                                 | <input type="radio"/> 1 | <input type="radio"/> 2 | <input type="radio"/> 3         | <input type="radio"/> 4 | <input type="radio"/> 5    | <input type="radio"/> 6 |
| 29. Did you feel worn out?                                              | <input type="radio"/> 1 | <input type="radio"/> 2 | <input type="radio"/> 3         | <input type="radio"/> 4 | <input type="radio"/> 5    | <input type="radio"/> 6 |
| 30. Have you been a happy person?                                       | <input type="radio"/> 1 | <input type="radio"/> 2 | <input type="radio"/> 3         | <input type="radio"/> 4 | <input type="radio"/> 5    | <input type="radio"/> 6 |
| 31. Did you feel tired?                                                 | <input type="radio"/> 1 | <input type="radio"/> 2 | <input type="radio"/> 3         | <input type="radio"/> 4 | <input type="radio"/> 5    | <input type="radio"/> 6 |

32. During the **past 4 weeks**, how much of the time has **your physical health or emotional problems** interfered with your social activities (like visiting with friends, relatives, etc.)?
- 1 - All of the time
  - 2 - Most of the time
  - 3 - Some of the time
  - 4 - A little of the time
  - 5 - None of the time

How TRUE or FALSE is **each** of the following statements for you.

|                    |                |               |                 |                     |
|--------------------|----------------|---------------|-----------------|---------------------|
| Definitely<br>true | Mostly<br>true | Don't<br>know | Mostly<br>false | Definitely<br>false |
|--------------------|----------------|---------------|-----------------|---------------------|

- 1  
2  
3 33. I seem to get sick a little easier       1       2       3       4       5  
4      than other people  
5  
6 34. I am as healthy as anybody I know       1       2       3       4       5  
7  
8 35. I expect my health to get worse       1       2       3       4       5  
9  
10 36. My health is excellent       1       2       3       4       5  
11  
12

13 *This tool was developed at RAND Health as part of the Medical Outcomes Study.*  
14  
15  
16  
17  
18  
19  
20  
21  
22  
23  
24  
25  
26  
27  
28  
29  
30  
31  
32  
33  
34  
35  
36  
37  
38  
39  
40  
41  
42  
43  
44  
45  
46  
47  
48  
49  
50  
51  
52  
53  
54  
55  
56  
57  
58  
59  
60

STROBE Statement—Checklist of items that should be included in reports of *cohort studies*

|                              | Item No | Recommendation                                                                                                                                                                                    | Page Number |
|------------------------------|---------|---------------------------------------------------------------------------------------------------------------------------------------------------------------------------------------------------|-------------|
| <b>Title and abstract</b>    | 1       | (a) Indicate the study's design with a commonly used term in the title or the abstract                                                                                                            | 1           |
|                              |         | (b) Provide in the abstract an informative and balanced summary of what was done and what was found                                                                                               | 5           |
| <b>Introduction</b>          |         |                                                                                                                                                                                                   |             |
| Background/rationale         | 2       | Explain the scientific background and rationale for the investigation being reported                                                                                                              | 7           |
| Objectives                   | 3       | State specific objectives, including any prespecified hypotheses                                                                                                                                  | 7           |
| <b>Methods</b>               |         |                                                                                                                                                                                                   |             |
| Study design                 | 4       | Present key elements of study design early in the paper                                                                                                                                           | 8           |
| Setting                      | 5       | Describe the setting, locations, and relevant dates, including periods of recruitment, exposure, follow-up, and data collection                                                                   | 8-13        |
| Participants                 | 6       | (a) Give the eligibility criteria, and the sources and methods of selection of participants. Describe methods of follow-up                                                                        | 8           |
|                              |         | (b) For matched studies, give matching criteria and number of exposed and unexposed                                                                                                               | -           |
| Variables                    | 7       | Clearly define all outcomes, exposures, predictors, potential confounders, and effect modifiers. Give diagnostic criteria, if applicable                                                          | 8-13        |
| Data sources/<br>measurement | 8*      | For each variable of interest, give sources of data and details of methods of assessment (measurement). Describe comparability of assessment methods if there is more than one group              | 8-13        |
| Bias                         | 9       | Describe any efforts to address potential sources of bias                                                                                                                                         | 8           |
| Study size                   | 10      | Explain how the study size was arrived at                                                                                                                                                         | 13-14       |
| Quantitative variables       | 11      | Explain how quantitative variables were handled in the analyses. If applicable, describe which groupings were chosen and why                                                                      | 14          |
| Statistical methods          | 12      | (a) Describe all statistical methods, including those used to control for confounding                                                                                                             | 14          |
|                              |         | (b) Describe any methods used to examine subgroups and interactions                                                                                                                               | 14          |
|                              |         | (c) Explain how missing data were addressed                                                                                                                                                       | -           |
|                              |         | (d) If applicable, explain how loss to follow-up was addressed                                                                                                                                    | -           |
|                              |         | (e) Describe any sensitivity analyses                                                                                                                                                             | 14          |
| <b>Results</b>               |         |                                                                                                                                                                                                   |             |
| Participants                 | 13*     | (a) Report numbers of individuals at each stage of study—eg numbers potentially eligible, examined for eligibility, confirmed eligible, included in the study, completing follow-up, and analysed | -           |
|                              |         | (b) Give reasons for non-participation at each stage                                                                                                                                              | -           |
|                              |         | (c) Consider use of a flow diagram                                                                                                                                                                | -           |
| Descriptive data             | 14*     | (a) Give characteristics of study participants (eg demographic, clinical, social) and information on exposures and potential confounders                                                          | -           |
|                              |         | (b) Indicate number of participants with missing data for each variable of interest                                                                                                               | -           |
|                              |         | (c) Summarise follow-up time (eg, average and total amount)                                                                                                                                       | -           |
| Outcome data                 | 15*     | Report numbers of outcome events or summary measures over time                                                                                                                                    | -           |
| Main results                 | 16      | (a) Give unadjusted estimates and, if applicable, confounder-adjusted estimates and their precision (eg, 95% confidence interval). Make clear                                                     | -           |

|                          |    |                                                                                                                                                                            |    |
|--------------------------|----|----------------------------------------------------------------------------------------------------------------------------------------------------------------------------|----|
|                          |    | which confounders were adjusted for and why they were included                                                                                                             |    |
|                          |    | (b) Report category boundaries when continuous variables were categorized                                                                                                  | -  |
|                          |    | (c) If relevant, consider translating estimates of relative risk into absolute risk for a meaningful time period                                                           | -  |
| Other analyses           | 17 | Report other analyses done—eg analyses of subgroups and interactions, and sensitivity analyses                                                                             | -  |
| <b>Discussion</b>        |    |                                                                                                                                                                            |    |
| Key results              | 18 | Summarise key results with reference to study objectives                                                                                                                   | -  |
| Limitations              | 19 | Discuss limitations of the study, taking into account sources of potential bias or imprecision. Discuss both direction and magnitude of any potential bias                 | -  |
| Interpretation           | 20 | Give a cautious overall interpretation of results considering objectives, limitations, multiplicity of analyses, results from similar studies, and other relevant evidence | -  |
| Generalisability         | 21 | Discuss the generalisability (external validity) of the study results                                                                                                      | -  |
| <b>Other information</b> |    |                                                                                                                                                                            |    |
| Funding                  | 22 | Give the source of funding and the role of the funders for the present study and, if applicable, for the original study on which the present article is based              | 19 |

\*Give information separately for exposed and unexposed groups.

**Note:** An Explanation and Elaboration article discusses each checklist item and gives methodological background and published examples of transparent reporting. The STROBE checklist is best used in conjunction with this article (freely available on the Web sites of PLoS Medicine at <http://www.plosmedicine.org/>, Annals of Internal Medicine at <http://www.annals.org/>, and Epidemiology at <http://www.epidem.com/>). Information on the STROBE Initiative is available at <http://www.strobe-statement.org>.

# BMJ Open

## Protocol for a Single-Centre Prospective Observational Study of Postoperative Delirium Following Total Joint Arthroplasties among South East Asians

|                                 |                                                                                                                                                                                                                                                                                                                                                                                                                                                                                                                                                                                                                                       |
|---------------------------------|---------------------------------------------------------------------------------------------------------------------------------------------------------------------------------------------------------------------------------------------------------------------------------------------------------------------------------------------------------------------------------------------------------------------------------------------------------------------------------------------------------------------------------------------------------------------------------------------------------------------------------------|
| Journal:                        | <i>BMJ Open</i>                                                                                                                                                                                                                                                                                                                                                                                                                                                                                                                                                                                                                       |
| Manuscript ID                   | bmjopen-2017-019426.R1                                                                                                                                                                                                                                                                                                                                                                                                                                                                                                                                                                                                                |
| Article Type:                   | Protocol                                                                                                                                                                                                                                                                                                                                                                                                                                                                                                                                                                                                                              |
| Date Submitted by the Author:   | 02-Jan-2018                                                                                                                                                                                                                                                                                                                                                                                                                                                                                                                                                                                                                           |
| Complete List of Authors:       | abdullah, hairil; Singapore General Hospital, Department of Anaesthesiology<br>Tan, Sapphire; University of Cambridge Pembroke College<br>Lee, Si Jia; Singapore General Hospital, Department of Anaesthesiology<br>Rahmatullah Bin Abd Razak, Hamid; Singapore General Hospital,<br>Department of Orthopaedic Surgery<br>Seet, Rachel; Singapore General Hospital, Department of Anaesthesiology<br>Ying, Hao; Singapore General Hospital, Health Services Research Unit<br>Sethi, Ervin; Singapore General Hospital, Department of Orthopaedic<br>Surgery<br>Sim, Eileen; Singapore General Hospital, Department of Anaesthesiology |
| <b>Primary Subject Heading</b>: | Anaesthesia                                                                                                                                                                                                                                                                                                                                                                                                                                                                                                                                                                                                                           |
| Secondary Subject Heading:      | Geriatric medicine, Mental health, Anaesthesia                                                                                                                                                                                                                                                                                                                                                                                                                                                                                                                                                                                        |
| Keywords:                       | postoperative, delirium, total joint arthroplasty, incidence                                                                                                                                                                                                                                                                                                                                                                                                                                                                                                                                                                          |
|                                 |                                                                                                                                                                                                                                                                                                                                                                                                                                                                                                                                                                                                                                       |

SCHOLARONE™  
Manuscripts

**TITLE**

Protocol for a Single-Centre Prospective Observational Study of Postoperative Delirium Following Total Joint Arthroplasties among South East Asians

Hairil Rizal Abdullah<sup>1</sup>, Sapphire RouXi Tan<sup>2</sup>, Si Jia Lee<sup>3</sup>, Hamid Rahmatullah Bin Abd Razak<sup>4</sup>, Rachel Huiqi Seet<sup>5</sup>, Ying Hao<sup>1</sup>, Ervin Sethi<sup>6</sup>, Eileen Yilin Sim<sup>3</sup>

<sup>1</sup>Consultant  
Department of Anaesthesiology  
Singapore General Hospital  
Adjunct Assistant Professor  
Duke-NUS Medical School  
Singapore

<sup>2</sup>Medical Student  
University of Cambridge  
Cambridge, United Kingdom

<sup>3</sup>Senior Resident  
Department of Anaesthesiology  
Singapore General Hospital  
Singapore

<sup>4</sup>Senior Resident  
Department of Orthopaedic Surgery  
Singapore General Hospital  
Singapore

<sup>5</sup>Medical Officer  
Department of Anaesthesiology  
Singapore General Hospital  
Singapore

<sup>6</sup>House Officer  
Department of Orthopaedic Surgery  
Singapore General Hospital  
Singapore

**\*Please address correspondence to:**

Hairil Rizal Abdullah



1  
2  
3 Department of Anaesthesiology  
4 Singapore General Hospital  
5 Outram Road  
6 Singapore 169608  
7 Email : hairil.rizal.abdullah@singhealth.com.sg  
8 Telephone: (65)63265519  
9

10  
11  
12 **Word count:** 3421  
13

14  
15 **Keywords:** postoperative, delirium, total joint arthroplasty, incidence  
16  
17  
18  
19  
20  
21  
22  
23  
24  
25  
26  
27  
28  
29  
30  
31  
32  
33  
34  
35  
36  
37  
38  
39  
40  
41  
42  
43  
44  
45  
46  
47  
48  
49  
50  
51  
52  
53  
54  
55  
56  
57  
58  
59  
60

**CONTRIBUTORSHIP STATEMENT**

| <b>Author</b>                   | <b>Role/Responsibility</b>                                                                                                                                                                                                                                                                                                                                      |
|---------------------------------|-----------------------------------------------------------------------------------------------------------------------------------------------------------------------------------------------------------------------------------------------------------------------------------------------------------------------------------------------------------------|
| Hairil Rizal Abdullah           | Designed and conceptualized study<br>Prepared draft manuscript<br>Revised draft manuscript<br>Approved final manuscript for submission<br>Statistical calculations<br>Agrees to be accountable for all aspects of the work in ensuring that questions related to the accuracy or integrity of any part of the work are appropriately investigated and resolved. |
| Sapphire RouXi Tan              | Designed and conceptualized study<br>Prepared draft manuscript<br>Revised draft manuscript<br>Approved final manuscript for submission<br>Statistical calculations<br>Agrees to be accountable for all aspects of the work in ensuring that questions related to the accuracy or integrity of any part of the work are appropriately investigated and resolved. |
| Si Jia Lee                      | Designed and conceptualized study<br>Revised draft manuscript<br>Approved final manuscript for submission<br>Agrees to be accountable for all aspects of the work in ensuring that questions related to the accuracy or integrity of any part of the work are appropriately investigated and resolved.                                                          |
| Hamid Rahmatullah Bin Abd Razak | Designed and conceptualized study<br>Revised draft manuscript<br>Approved final manuscript for submission<br>Agrees to be accountable for all aspects of the work in ensuring that questions related to the accuracy or integrity of any part of the work are appropriately investigated and resolved.                                                          |
| Rachel Huiqi Seet               | Designed and conceptualized study<br>Revised draft manuscript<br>Approved final manuscript for submission<br>Agrees to be accountable for all aspects of the work in ensuring that questions related to the accuracy or integrity of any part of the work are appropriately investigated and resolved.                                                          |
| Ying Hao                        | Designed and conceptualized study                                                                                                                                                                                                                                                                                                                               |

|                  |                                                                                                                                                                                                                                                                                                        |
|------------------|--------------------------------------------------------------------------------------------------------------------------------------------------------------------------------------------------------------------------------------------------------------------------------------------------------|
|                  | Revised draft manuscript<br>Approved final manuscript for submission<br>Statistical calculations<br>Agrees to be accountable for all aspects of the work in ensuring that questions related to the accuracy or integrity of any part of the work are appropriately investigated and resolved.          |
| Ervin Sethi      | Designed and conceptualized study<br>Revised draft manuscript<br>Approved final manuscript for submission<br>Agrees to be accountable for all aspects of the work in ensuring that questions related to the accuracy or integrity of any part of the work are appropriately investigated and resolved. |
| Eileen Yilin Sim | Designed and conceptualized study<br>Revised draft manuscript<br>Approved final manuscript for submission<br>Agrees to be accountable for all aspects of the work in ensuring that questions related to the accuracy or integrity of any part of the work are appropriately investigated and resolved. |

## ABSTRACT

### Introduction

Postoperative delirium is a serious and common complication in older adults following Total Joint Arthroplasties (TJA). It is associated with increased risk of postoperative complications, mortality, length of hospital stay and postdischarge institutionalisation. Thus, it has a negative impact on the health-related quality of life of the patient and poses a large economic burden. This study aims to characterise the incidence of postoperative delirium following TJA in the South East Asian population, and investigate any risk factors or associated outcomes.

### Methods and analysis

This is a single-centre prospective observational study, recruiting patients between 65 and 90 years old undergoing elective Total Knee Arthroplasty or Total Hip Arthroplasty. Exclusion criteria included patients with clinically diagnosed dementia. Preoperative and intraoperative data will be obtained prospectively. The primary outcome will be the presence of postoperative delirium assessed using the Confusion Assessment Method on postoperative day 1, 2, 3 and day-of-discharge. Other secondary outcomes assessed postoperatively will include hospital outcomes, pain at rest, knee and hip function, health-related quality of life and POMS-defined morbidity. Data will be analysed to calculate the incidence of postoperative delirium. Potential risk factors and any associated outcomes of postoperative delirium will also be determined.

### Ethics and dissemination

This study has been approved by the Singapore General Hospital Institutional Review Board (SGH IRB) (CIRB Ref: 2017/2467) and is registered on the ClinicalTrials.gov registry (Identified: NCT03260218). An informed consent form will be signed by all participants before recruitment and translators will be made available to non-English speaking participants. The results of this study will be presented at international conferences and submitted to a peer-reviewed journal. The data collected will also be made available in a public data repository.

## STRENGTHS AND LIMITATIONS

### Strengths

1. This study is the first to evaluate the incidence of postoperative delirium in the elderly above 65 years old following TKA and THA in Singapore.
2. Association of variables to occurrence of postoperative delirium that have not been well studied such as hand grip strength, STOP-Bang score and long-term outcomes including knee function and HRQoL will be analysed.
3. The Confusion Assessment Method (CAM) will be used, which is a gold standard measure for detection of delirium.

### Limitations

1. The study is conducted in a single centre in Singapore which may limit the generalisability of the results of the study.
2. Delirium will be only assessed once a day, and the presence of delirium may be missed due to the fluctuating nature of the condition.

## INTRODUCTION

Delirium is a neurocognitive disorder characterised by a disturbance in attention, level of consciousness and cognition, in which symptoms are acute in onset and may fluctuate in severity throughout the day<sup>1</sup>. Delirium is a common perioperative complication in older adults following total joint arthroplasty (TJA). The incidence of postoperative delirium following TJA may be as high as 17%<sup>2</sup>, although there is no data from the South-East Asian population, exposing a knowledge gap.

Patients with delirium after any surgery have an increased risk of major postoperative complications and increased mortality<sup>3,4</sup>. They also experience significantly longer hospital stay and are at increased risk of subsequent postdischarge institutionalisation<sup>4-6</sup>, which increases total procedural cost<sup>7</sup>. With the demand of total hip arthroplasty (THA) expected to rise by almost 2-fold and that for total knee arthroplasty (TKA) by almost 7-fold by 2030<sup>8</sup>, postoperative delirium is likely to become a significant health and economic burden. However, the impact of delirium on outcomes after TJA have not been well reported, identifying a potential knowledge gap. Furthermore, due to these various negative outcomes of postoperative delirium, it is important to characterise the risk factors associated with postoperative delirium. Older age has been reported as one of the most important risk factor for developing postoperative delirium<sup>9,10</sup>. According to an existing study, the average age of the population undergoing TJA is 71 years, and majority of patients are 65 years or older (81.3% for TKR and 69.5% for THR)<sup>7</sup>. Thus, the population under study particularly at risk to postoperative delirium. Other important predisposing risk factors include pre-existing cognitive impairment, poor physical status, alcohol abuse<sup>5,9,10</sup>. While these are common risk factors for the TJA population, few studies have investigated if these risk factors also predispose to postoperative delirium following TJA specifically. There is a need to investigate the presence of other risk factors particular to TJA, especially if any are modifiable. As most of such operations are elective, there may be an opportunity to address the modifiable risk factors to optimise the patient prior to the surgery or to implement perioperative management strategies to mitigate the negative outcomes of postoperative delirium.

Given the limited knowledge on the incidence, risk factors and outcomes of postoperative delirium in the South East Asian population, together with the increasing number of older adults undergoing TJA, this study's primary aim is to characterise the incidence of delirium among older adults undergoing elective TJA. Our secondary aim is to identify risk factors of postoperative delirium following elective TJA among the elderly, including demography, comorbidities, clinical laboratory data and drugs used in the perioperative period. Our final aim is to investigate the impact of postoperative delirium on the immediate and longer term postoperative recovery after TJA. Identifying such risk factors and associated clinical or functional outcomes may be important in guiding perioperative care of prospective patients undergoing TJA.

## METHODS AND ANALYSIS

### Study design

Institutional Review Board approval was obtained (Singhealth CIRB 2017/2467) prior to starting the study. This is a single centre, prospective observational study conducted at a tertiary public hospital in Singapore (Singapore General Hospital (SGH)). SGH is the largest hospital in Singapore with 1,597 beds in 2013<sup>11</sup>. 1,500 TKA surgeries were performed in SGH in 2007, accounting for 65% of all TKA surgeries in Singapore<sup>12</sup>.

### Study population

Patients aged between 65 and 90 undergoing elective total joint (hip or knee) replacement surgery in Singapore General Hospital will be screened for eligibility. A minimum age of 65 years old was chosen to be recruited based on the original study which developed and validated CAM<sup>13</sup>. Exclusion criteria includes patients who are unable to give their own consent for the surgery and anaesthesia. Patients with clinically diagnosed dementia will also be excluded from the study as they are deemed not to have capacity for consent.

All eligible patients will be identified from the appointment list of attendees of the preoperative evaluation clinic (PEC) at SGH where the patients attend for preoperative assessment and counselling by the anaesthetists. Patients between 65 and 90 years old undergoing TKA or THA will be approached and invited to enrol into the study. Informed consent will be obtained then.

### Preoperative data

We will collect the patients' baseline characteristics preoperatively. This will allow for the identification of risk factors or correction of confounding factors during analysis of the results.

#### Data on cognitive status

Before the operation, each patient will be interviewed to assess their baseline cognitive status. The Mini-Mental State Examination (MMSE) will be used, which is a 11-question screening tool used to evaluate the cognitive aspects of mental function<sup>14</sup>. It measures domains of cognitive function including memory, attention, language, praxis and visuospatial ability. A score of 0-30 can be obtained with higher values denoting better cognitive function. A score of <24 suggests cognitive impairment. The test was adapted for use in Singapore, and the changes and reasons for the changes shown in the table in Supplementary file 1. In addition, the test will be administered in English, Chinese or Malay, according to the language the participant is most well-versed in. The Chinese version of MMSE that will be used was previously validated in Shanghai<sup>15</sup> and in Singapore<sup>16</sup>. The Malay version of MMSE that will be used was developed by translation from the English version. The Chinese and Malay versions of MMSE have similar test questions and are scored the same way as the English version, but there some differences shown in Supplementary file 2. However, a recent study in Singapore has shown that there were significant ethnic differences in unadjusted MMSE scores using the different versions of MMSE. These differences were not eliminated after accounting for known correlates of MMSE performance such as

1  
2  
3 socioeconomic status, comorbid illnesses, functional health status, and health-related  
4 behaviours<sup>17</sup>.

5  
6 The Confusion Assessment Method (CAM) will also be performed prior to the operation to  
7 obtain the patient's baseline score. CAM is a screening instrument for delirium intended for  
8 use by non-psychiatrically-trained clinicians based on the Diagnostic and Statistical Manual  
9 of Mental Disorders (DSM)-III-R criteria<sup>18</sup>. It involves an interview whereby delirium can be  
10 diagnosed using the CAM algorithm based on 4 criteria – (1) acute onset or fluctuating  
11 course, (2) inattention, (3) disorganised thinking and (4) altered level of consciousness, as  
12 can be seen in Figure 1. Delirium is said to be present if criteria 1 and 2 and either of 3 or 4  
13 are present. CAM has a sensitivity of 94-100%, specificity of 90-95%, and high inter-  
14 observer reliability<sup>13</sup>. This enables a new case of delirium in the postoperative period to be  
15 detected.  
16

### 17 Other data

18  
19 Sensory impairment will be assessed during the preoperative interviews. Patients will be  
20 asked to wear their visual or hearing aids during these interviews. A patient will be  
21 considered to have visual or hearing impairment if the research member conducting the  
22 interview is unable to perform the interview normally due to the sensory impairment, such as  
23 raising his/her voice for a patient with impaired hearing. The preoperative MMSE  
24 assessment provides a useful tool in assessing for visual impairment as it has several vision-  
25 dependent items (naming objects, following a written command, instructions to handle a  
26 piece of paper, writing a sentence, copying a diagram)<sup>19</sup>.  
27  
28

29 The grip strength of each patient will also be measured using the JAMAR® Plus+ Digital  
30 Hand Dynamometer (Sammons Preston Inc, Bolingbrook, IL). Hand dynamometry has  
31 acceptable reliability and validity for measurement of grip strength<sup>20</sup>, which can serve as an  
32 indicator of muscle function and physical fitness. The normative value of hand grip strength  
33 for elderly in Singapore has recently been published, decreasing from 18.6kg and 29.3kg for  
34 females and males respectively in the 65-69 age group to 12.4kg and 18.5kg in the 85+ age  
35 group<sup>21</sup>.  
36  
37

38 The patient baseline characteristics will be obtained from the medical records. All  
39 perioperative data will be prospectively entered into the REDCap™ database. This will  
40 include data regarding patient's demographics, smoking history, alcohol history, pre-existing  
41 medical conditions, preoperative medications.  
42

43 Each patient will also be rated preoperatively by an anaesthesiologist in the PEC based on  
44 the American Society of Anaesthesiologists (ASA) physical status classification<sup>22</sup>. It is a  
45 scale from 1 to 5, where 1 represents a completely healthy fit patient and 5 representing a  
46 moribund patient who is not expected to live 24 hours with or without surgery. For our  
47 analysis, we will be calculating each patient's perioperative risk based on the Charlson  
48 Comorbidity Index (CCI)<sup>23</sup>. 19 different comorbid medical conditions are assigned weights of  
49 1, 2, 3 and 6 according to the degree to which they predicted mortality, and the sum of these  
50 values gives the final score. It is a valid method of estimating risk of mortality resulting from  
51 comorbidities<sup>24</sup>. The STOP-Bang score will also be calculated for each patient. The STOP-  
52 Bang questionnaire was a good screening tool for diagnosing obstructive sleep apnoea, with  
53 a sensitivity of 89.0% and accuracy of 79.1%<sup>25</sup>. Preoperative laboratory results, including  
54 data about haemoglobin or creatinine level, will also be collected.  
55  
56  
57  
58  
59  
60



1  
2  
3 Preoperative baseline functional scores for TKA (Oxford Knee Score, Knee Society  
4 Functional Score and Knee Society Knee Score) and for THA (Harris Hip Score and Parker  
5 Mobility Score) will be obtained from the patient by trained staff at the Orthopaedic  
6 Diagnostic Centre (ODC). These assessments will be further discussed in the “Postoperative  
7 data” section.  
8

9 The preoperative data collection form (DCF) can be seen in Supplementary file 3.  
10

### 11 12 **Intraoperative data**

13  
14 Data regarding the surgery will be collected. Intraoperative data includes type of arthroplasty  
15 performed (TKA or THA), type of anaesthesia (spinal, general or other anaesthesia), use of  
16 femoral nerve block, intraoperative drug use, tourniquet time, intra-articular injections and  
17 blood transfusion (number of pints transfused). Occurrence of hypotension, which is defined  
18 as a mean arterial pressure <60mmHg, and its duration will also be recorded.  
19  
20

### 21 22 **Postoperative data**

#### 23 Primary outcome

24  
25 The primary outcome will be the presence of postoperative delirium following TJA. Each  
26 patient will be assessed for delirium on postoperative day (POD) 1, 2 and 3 in the wards at  
27 7am as well as the day of discharge. Delirium will not be evaluated on POD 0 due to  
28 difficulty in differentiating delirium from the effects of residual anaesthesia.  
29  
30

31 CAM will be used to detect postoperative delirium and delirium severity. Delirium is said to  
32 be present if the patient meets the CAM criteria for any of the postoperative assessments.  
33 Patients assessed to have delirium will be referred to the psychiatrists for a formal diagnosis  
34 based on the DSM-V criteria and for further management.  
35

#### 36 Short-term secondary outcomes

37  
38 Postoperative complications will be assessed by the Postoperative Morbidity Survey (POMS).  
39 This is a 9-point survey that can be easily used by clinicians to characterise short-term  
40 postoperative morbidity in their respective settings<sup>26</sup>. It is designed to only identify morbidity  
41 of a type and severity that could prolong length of stay (LOS). Using POMS, postoperative  
42 morbidity outcomes can be dichotomised into 2 categories – the absence and presence of  
43 morbidity. The POMS instrument can be seen in Supplementary file 4 attached. POMS will  
44 be assessed on POD 3, 5, 8 and 15, as recommended by the original literature<sup>26</sup>. It has also  
45 been reported to have good inter-rater reliability and acceptability to patients<sup>27</sup>.  
46  
47

48 Other postoperative outcomes that will be obtained include postoperative nausea and  
49 vomiting (PONV), LOS and 30-day readmission rates. 30-day readmission is defined as  
50 readmission within 30 days of initial admission. The reason for readmission will also be  
51 obtained.  
52

#### 53 Long-term secondary outcomes

54  
55 Longer-term outcomes such as functional and health-related quality-of-life (HRQoL)  
56 outcomes will also be recorded by the ODC total joint registry at 6 months, 1 year, 2 years  
57  
58  
59

1  
2  
3 and 5 years postoperatively. The ODC tracks clinical outcome measures during pre- and  
4 postoperative functional assessments of the patients in SGH. Their total joint registry  
5 contains data about outcomes from knee and hip arthroplasties.  
6

7 For patients undergoing TKA, knee function will be measured using the new Knee Society  
8 Knee Score (KSKS) and Function Score (KSFS)<sup>28</sup>. The physician-derived KSKS measures  
9 alignment, stability, joint motion and symptoms experienced. The patient-derived KSFS  
10 evaluates use of walking aids and supports, ability to complete standard activities of daily  
11 living and discretionary activities. The KSKS and KSFS each range from 0 (worst) to 100  
12 (best). Both provide a validated rating of the functional outcome of the patient and knee  
13 prosthesis after TKA<sup>29</sup>. In addition, the Oxford Knee Score (OKS)<sup>30</sup> will also be used, which  
14 is a 12-item, patient-assessed questionnaire designed specifically for use in patients  
15 undergoing TKA [7]. It assesses an individual's pain and physical disability. Each item is  
16 scored from 1 (least difficulty/severity) to 5 (most difficulty/severity), and individual item  
17 scores are summed to yield an overall score ranging from 12 (no pain or limitation) to 60  
18 (severe pain or limitation). A lower OKS indicates a better outcome. It has good reliability,  
19 construct and content validity, and sensitivity to clinically important changes over time<sup>30,31</sup>. It  
20 correlates strongly with pain but less with postoperative functioning<sup>32</sup>.  
21  
22

23 For patients undergoing THA, hip function will be measured using the Harris Hip Score  
24 (HHS)<sup>33</sup>. The HHS is a clinician-based tool to assess the outcomes of hip surgery such as  
25 THA. It contains 4 subscales – pain severity, function, absence of deformity and range of  
26 motion. The total score ranges from 0 (worst) and 100 (best). It showed high validity and  
27 reliability when used to study the clinical outcome of THA<sup>34</sup>. Hip function will also be  
28 measured using the Parker Mobility Score (PMS)<sup>35</sup>. A score of 1 represents a patient who  
29 does not require a walking aid and has no restriction in walking distance, while a score of 10  
30 represents a patient who is mostly bedbound. It is reliable and a valid predictor of in-hospital  
31 and long-term outcomes<sup>35-37</sup>. Outcomes for THA will only be recorded at 6 months and 2  
32 years, unlike the other long-term secondary outcomes.  
33  
34

35 HRQoL will be assessed based on the 36-Item Short Form Health Survey (SF-36)<sup>38</sup> to obtain  
36 a baseline score. It consists of 36 questions categorised into 8 domains (physical functioning,  
37 bodily pain, role limitations due to physical health problems, role limitations due to personal  
38 or emotional problems, emotional well-being, social functioning, energy/fatigue, and general  
39 health perceptions). This instrument is shown in Supplementary file 5. Higher scores indicate  
40 better health status and quality of life.  
41  
42

43 Days alive and out of hospital (DAOH) will also be determined for each patient at 1 month, 6  
44 months and 12 months to assess overall impact of postoperative delirium on morbidity and  
45 mortality. DAOH will be calculated based on death date (if present) and duration of all  
46 subsequent hospitalisations until the follow-up date. This will be recorded as a percentage  
47 by dividing DAOH by total potential follow-up period, which is the time period between the  
48 operation and the respective dates of follow-up (1 month, 6 months and 12  
49 months). %DAOH is a useful measure as it emphasises the deaths occurring early in follow-  
50 up and takes into account the severity (duration) of any hospitalisation.<sup>39</sup>  
51

### 52 Postoperative risk factors

53  
54 Other postoperative data will be collected as variables for risk factors.  
55  
56  
57  
58  
59  
60

1  
2  
3 Postoperative pain at rest will be evaluated using the pain Visual Analog Scale (VAS) during  
4 the same visit as CAM on POD 1, 2 and 3. Each patient will score pain experienced at rest  
5 on a scale, with 0 = no pain and 10 = maximum pain.

6  
7 Sensory impairment will also be assessed during the postoperative interviews similar to the  
8 preoperative assessments.

9  
10 The postoperative DCF can be seen in Supplementary file 6.

11  
12 The flowchart shown in Figure 2 depicts a patient's journey starting from enrolment in the  
13 PEC.

### 14 15 16 **Data management**

17  
18 Patient data will be kept confidential throughout the study. All electronic study data entry,  
19 storage and analysis will be done according to institutional data security policy, using  
20 password protected data in secure systems.

21  
22 The patient data collected will be de-identified and the key kept securely separated with  
23 access limited to principal investigator and co-investigators. A study-related identification  
24 number given to each patient will be used on the case report form. Research members will  
25 enter the de-identified data into the REDCap™ (Research Electronic Data Capture) tool  
26 hosted on a secure server at Singapore General Hospital<sup>36</sup>. The hardcopy of the research  
27 data will be securely stored within the department. The softcopy of research data will be  
28 saved in a password-protected file and will be stored in institution approved login-protected  
29 system and encrypted hard-drive. Only study members will have access to the data.

### 30 31 32 33 **Power and sample size calculations**

34  
35 The primary aim of the study is to characterise the incidence of postoperative delirium  
36 following TJA, which is estimated at around 10% based on existing literature<sup>2</sup>. Using this  
37 estimate, 150 patients are enough to detect the incidence with a precision of 5% and  
38 confidence level of 95%.

39  
40 However, this study will also aim to detect potential factors which may be correlated to  
41 postoperative delirium by logistic regression. Thus, we will target to recruit 500 patients such  
42 that we are able to investigate the risk factors and associated outcomes of postoperative  
43 delirium using multiple logistic models while minimising the limitation of a small number of  
44 events of postoperative delirium.

### 45 46 47 48 **Statistical analyses**

49  
50 The incidence of postoperative delirium following TJA using the standard formula – the  
51 number of patients diagnosed to have postoperative delirium divided by the total number of  
52 patients in the study, and the result expressed as a percentage.

53  
54 Potential risk factors of postoperative delirium will also be identified by comparing the  
55 perioperative data recorded between the patients with and without postoperative delirium.  
56 Data will first be summarised using descriptive statistics including mean, standard deviation

1  
2  
3 (SD), median, range and frequency tables. Univariate analyses will then be used identify the  
4 differences between the two groups. Data of continuous variables will be compared using  
5 the Student's t-test (normally distributed data) or the Wilcoxon rank sum test (not normally  
6 distributed data). Data of categorical variables will be compared by Pearson Chi-square test  
7 or Fisher's exact test.

8  
9 The variables which are statistically significant or close to significant ( $p$  value  $<0.05$  or  $<0.1$ )  
10 between the two groups of patients will then be selected for inclusion in a multivariate logistic  
11 regression model. This will determine the independent predictors of postoperative delirium.  
12 The final model will be determined by sensitivity analysis. The sensitivity analysis can help  
13 us to understand the contribution of each parameter to the model outputs, investigate which  
14 parameter will have the biggest influence and then refine the model to obtain the final model  
15 which is statistically and clinically meaningful. Odds ratio (OR) will be used to describe the  
16 correlation of them with postoperative delirium.

17  
18 Postoperative outcomes which are associated with the incidence of postoperative delirium  
19 will also be examined by comparing patients with and without postoperative delirium. The  
20 postoperative POMS score, incidence of PONV, LOS, incidence of 30-day readmission  
21 and %DAOH will be similarly compared using Student's t-test and Pearson Chi-square tests  
22 as appropriate.

23  
24 For the long-term postoperative outcomes, the median postoperative SF-36 for each domain,  
25 KSKS, KSFS, OKS, HHS and PMS scores applicable at 6 months, 1 year, 2 years and 5  
26 years will be compared to the median preoperative baseline scores using the Wilcoxon  
27 matched pairs sign rank test. The tests with a change greater than the minimally clinically  
28 important difference (MCID) will be identified. The MCID values for each test will be obtained  
29 from the pre-existing literature. These variables will then be analysed by analysis of  
30 covariance (ANCOVA) to identify predictors of the long-term postoperative test scores. All  
31 predictor variables will be incorporated into the multivariate ANCOVA model. Analyses will  
32 be performed separately for the various tests that demonstrated changes greater than MCID.  
33  
34  
35  
36  
37  
38  
39  
40  
41  
42  
43  
44  
45  
46  
47  
48  
49  
50  
51  
52  
53  
54  
55  
56  
57  
58  
59  
60

## ETHICS AND DISSEMINATION

This study has been approved by the Singapore General Hospital Institutional Review Board (SGH IRB) (CIRB Ref: 2017/2467) and is registered on the ClinicalTrials.gov registry (Identified: NCT03260218). In the event of any important protocol modifications, all investigators, SGH IRB and trial participants will be notified.

The results of this study will be presented at international conferences and submitted to a peer-reviewed journal. The data collected will also be made available in a public data repository.

All eligible participants will be approached by the research assistant during their visit to the preoperative evaluation clinic. They will be given an explanation about the study, a patient information sheet and a consent form. They will then be given an ample time to consider if they would like to participate in the study. They will also be allowed to ask questions freely. If the participant expresses an interest to participate in the study, a written consent will be obtained. The consent forms are in English. However, participants from non-English speaking backgrounds will be provided a translator. For illiterate participants, an accompanying family member will be approached to verify and witness the consent process.

## REFERENCES

1. American Psychiatric Association: Diagnostic and Statistical Manual of Mental Disorders, Fifth Edition. Arlington, VA, American Psychiatric Association, 2013.
2. Scott JE, Mathias JL, Kneebone AC. Incidence of delirium following total joint replacement in older adults: A meta-analysis. *Gen Hosp Psychiatry*. 2015;37(3):223-229. doi:10.1016/j.genhosppsy.2015.02.004.
3. Rudolph JL, Marcantonio ER. Postoperative Delirium: Acute Change with Long-Term Implications. *Anesth Analg*. 2011. doi:10.1038/jid.2014.371.
4. Rudolph JL, Jones RN, Rasmussen LS, Silverstein JH, Inouye SK, Marcantonio ER. Independent Vascular and Cognitive Risk Factors for Postoperative Delirium. *Am J Med*. 2007;120(9):807-813. doi:10.1016/j.amjmed.2007.02.026.
5. Marcantonio ER, Goldman L, Mangione CM, et al. A clinical prediction rule for delirium after elective noncardiac surgery. *JAMA*. 1994;271(2):134-139. <http://www.ncbi.nlm.nih.gov/pubmed/8264068>. Accessed July 13, 2017.
6. Witlox J, Eurelings LSM, de Jonghe JFM, Kalisvaart KJ, Eikelenboom P, van Gool WA. Delirium in Elderly Patients and the Risk of Postdischarge Mortality, Institutionalization, and Dementia. *JAMA*. 2010;304(4):443. doi:10.1001/jama.2010.1013.
7. Lovald ST, Ong KL, Malkani AL, et al. Complications, Mortality, and Costs for Outpatient and Short-Stay Total Knee Arthroplasty Patients in Comparison to Standard-Stay Patients. *J Arthroplasty*. 2014;29(3):510-515. doi:10.1016/j.arth.2013.07.020.
8. Kurtz S, Ong K, Lau E, Mowat F, Halpern M. Projections of Primary and Revision Hip and Knee Arthroplasty in the United States from 2005 to 2030. *J Bone Jt Surg*. 2007;89(4):780. doi:10.2106/JBJS.F.00222.
9. Raats JW, van Eijnden WA, Crolla RMPH, Steyerberg EW, van der Laan L, Hummel T. Risk Factors and Outcomes for Postoperative Delirium after Major Surgery in Elderly Patients. Marengoni A, ed. *PLoS One*. 2015;10(8):e0136071. doi:10.1371/journal.pone.0136071.
10. Elie M, Cole MG, Primeau FJ, Bellavance F. Delirium risk factors in elderly hospitalized patients. *J Gen Intern Med*. 1998;13(3):204-212. doi:10.1046/j.1525-1497.1998.00047.x.
11. Quick Facts – Singapore General Hospital. <https://www.sgh.com.sg/about-us/more-about-sgh/pages/quickfacts.aspx>. Accessed July 14, 2017.
12. Adult Reconstructive Service – Singapore General Hospital. <https://www.sgh.com.sg/departments/ortho/services/pages/adult-reconstructive-service.aspx>. Published 2014. Accessed July 14, 2017.
13. Inouye SK, Dyck CH van, Alessi CA, Balkin S, Siegal AP, Horwitz RI. Clarifying Confusion: The Confusion Assessment Method. *Ann Intern Med*. 1990;113(12):941. doi:10.7326/0003-4819-113-12-941.
14. Folstein MF, Folstein SE, McHugh PR. "Mini-mental state". A practical method for grading the cognitive state of patients for the clinician. *J Psychiatr Res*. 1975;12(3):189-198. doi:10.1016/0022-3956(75)90026-6.
15. Katzman R, Zhang MY, Ouang-Ya-Qu, et al. A Chinese version of the Mini-Mental State Examination; impact of illiteracy in a Shanghai dementia survey. *J Clin*



- 1  
2  
3 *Epidemiol.* 1988;41(10):971-978. <http://www.ncbi.nlm.nih.gov/pubmed/3193141>.  
4 Accessed July 17, 2017.
- 5  
6 16. Sahadevan S, Lim PP, Tan NJ, Chan SP. Diagnostic performance of two mental  
7 status tests in the older chinese: influence of education and age on cut-off values. *Int*  
8 *J Geriatr Psychiatry.* 2000;15(3):234-241.  
9 <http://www.ncbi.nlm.nih.gov/pubmed/10713581>. Accessed July 17, 2017.
- 10  
11 17. Ng T-P, Niti M, Chiam P-C, Kua E-H. Ethnic and Educational Differences in Cognitive  
12 Test Performance on Mini-Mental State Examination in Asians. *Am J Geriatr*  
13 *Psychiatry.* 2007;15(2):130-139. doi:10.1097/01.JGP.0000235710.17450.9a.
- 14  
15 18. Confusion Assessment Method. © 1988, 2003, Hospital Elder Life Program. All rights  
16 reserved. Adapted from: Inouye SK et al. *Ann Intern Med.* 1990; 113:941-8.
- 17  
18 19. Pye A, Charalambous AP, Leroi I, Thodi C, Dawes P. Screening tools for the  
19 identification of dementia for adults with age-related acquired hearing or vision  
20 impairment: a scoping review. *Int Psychogeriatrics.* 2017:1-14.  
21 doi:10.1017/S104161021700120X.
- 22  
23 20. Mathiowetz V, Weber K, Volland G, Kashman N. Reliability and validity of grip and  
24 pinch strength evaluations. *J Hand Surg Am.* 1984;9(2):222-226.  
25 <http://www.ncbi.nlm.nih.gov/pubmed/6715829>. Accessed July 14, 2017.
- 26  
27 21. Ong HL, Abdin E, Chua BY, et al. Hand-grip strength among older adults in Singapore:  
28 a comparison with international norms and associative factors. *BMC Geriatr.*  
29 2017;17(1):176. doi:10.1186/s12877-017-0565-6.
- 30  
31 22. Daabiss M. American Society of Anaesthesiologists physical status classification.  
32 *Indian J Anaesth.* 2011;55(2):111-115. doi:10.4103/0019-5049.79879.
- 33  
34 23. Charlson ME, Pompei P, Ales KL, MacKenzie CR. A new method of classifying  
35 prognostic comorbidity in longitudinal studies: development and validation. *J Chronic*  
36 *Dis.* 1987;40(5):373-383. <http://www.ncbi.nlm.nih.gov/pubmed/3558716>. Accessed  
37 July 13, 2017.
- 38  
39 24. Charlson ME, Szatrowski TP, Peterson J, Gold J. Validation of a combined  
40 comorbidity index. *J Clin Epidemiol.* 1994;47(11):1245-1251.  
41 <http://www.ncbi.nlm.nih.gov/pubmed/7722560>. Accessed July 17, 2017.
- 42  
43 25. Prasad KT, Sehgal IS, Agarwal R, Nath Aggarwal A, Behera D, Dhooria S. Assessing  
44 the likelihood of obstructive sleep apnea: a comparison of nine screening  
45 questionnaires. *Sleep Breath.* 2017:1-9. doi:10.1007/s11325-017-1495-4.
- 46  
47 26. Bennett-Guerrero E, Welsby I, Dunn TJ, et al. The use of a postoperative morbidity  
48 survey to evaluate patients with prolonged hospitalization after routine, moderate-risk,  
49 elective surgery. *Anesth Analg.* 1999;89(2):514-519. doi:10.1213/00000539-  
50 199908000-00050.
- 51  
52 27. Grocott MPW, Browne JP, Van der Meulen J, et al. The Postoperative Morbidity  
53 Survey was validated and used to describe morbidity after major surgery. *J Clin*  
54 *Epidemiol.* 2007;60(9):919-928. doi:10.1016/j.jclinepi.2006.12.003.
- 55  
56 28. Insall JN, Dorr LD, Scott RD, Scott WN. Rationale of the Knee Society clinical rating  
57 system. *Clin Orthop Relat Res.* 1989;(248):13-14.  
58 <http://www.ncbi.nlm.nih.gov/pubmed/2805470>. Accessed July 13, 2017.
- 59  
60 29. Scuderi GR, Bourne RB, Noble PC, Benjamin JB, Lonner JH, Scott WN. The new  
Knee Society Knee Scoring System. *Clin Orthop Relat Res.* 2012;470(1):3-19.  
doi:10.1007/s11999-011-2135-0.

- 1  
2  
3 30. Dawson J, Fitzpatrick R, Murray D, Carr A. Questionnaire on the perceptions of  
4 patients about total knee replacement. *J Bone Joint Surg Br.* 1998;80(1):63-69.  
5 <http://www.ncbi.nlm.nih.gov/pubmed/9460955>. Accessed July 14, 2017.
- 6  
7 31. Garratt AM, Brealey S, Gillespie WJ. Patient-assessed health instruments for the  
8 knee: a structured review. *Rheumatology.* 2004;43(11):1414-1423.  
9 doi:10.1093/rheumatology/keh362.
- 10  
11 32. van Hove RP, Brohet RM, van Royen BJ, Nolte PA. High correlation of the Oxford  
12 Knee Score with postoperative pain, but not with performance-based functioning.  
13 *Knee Surgery, Sport Traumatol Arthrosc.* 2016;24(10):3369-3375.  
14 doi:10.1007/s00167-015-3585-9.
- 15  
16 33. Harris WH. Traumatic arthritis of the hip after dislocation and acetabular fractures:  
17 treatment by mold arthroplasty. An end-result study using a new method of result  
18 evaluation. *J Bone Joint Surg Am.* 1969;51(4):737-755.  
19 <http://www.ncbi.nlm.nih.gov/pubmed/5783851>. Accessed December 15, 2017.
- 20  
21 34. Söderman P, Malchau H. Is the Harris hip score system useful to study the outcome  
22 of total hip replacement? *Clin Orthop Relat Res.* 2001;(384):189-197.  
23 <http://www.ncbi.nlm.nih.gov/pubmed/11249165>. Accessed December 15, 2017.
- 24  
25 35. Parker MJ, Palmer CR. A new mobility score for predicting mortality after hip fracture.  
26 *J Bone Joint Surg Br.* 1993;75(5):797-798.  
27 <http://www.ncbi.nlm.nih.gov/pubmed/8376443>. Accessed December 16, 2017.
- 28  
29 36. Kristensen M, Bandholm T, Foss N, Ekdahl C, Kehlet H. High inter-tester reliability of  
30 the new mobility score in patients with hip fracture. *J Rehabil Med.* 2008;40(7):589-  
31 591. doi:10.2340/16501977-0217.
- 32  
33 37. Kristensen MT, Foss NB, Ekdahl C, Kehlet H. Prefracture functional level evaluated  
34 by the New Mobility Score predicts in-hospital outcome after hip fracture surgery. *Acta*  
35 *Orthop.* 2010;81(3):296-302. doi:10.3109/17453674.2010.487240.
- 36  
37 38. Ware JE, Sherbourne CD. The MOS 36-item short-form health survey (SF-36). I.  
38 Conceptual framework and item selection. *Med Care.* 1992;30(6):473-483.  
39 <http://www.ncbi.nlm.nih.gov/pubmed/1593914>. Accessed July 13, 2017.
- 40  
41 39. Ariti CA, Cleland JGF, Pocock SJ, et al. Days alive and out of hospital and the patient  
42 journey in patients with heart failure: Insights from the Candesartan in Heart failure:  
43 Assessment of Reduction in Mortality and morbidity (CHARM) program. *Am Heart J.*  
44 2011;162(5):900-906. doi:10.1016/j.ahj.2011.08.003.
- 45  
46  
47  
48  
49  
50  
51  
52  
53  
54  
55  
56  
57  
58  
59



**FUNDING STATEMENT**

This work was supported by the Singhealth Duke-NUS Academic Medical Centre Nurturing Clinician Scientists Scheme Award, project number 12/FY2017/P1/15-A29. This funding source, Singhealth Duke-NUS Academic Medical Centre, has no role in the design of this study and will not have a role in the analysis and interpretation of the results.

**COMPETING INTEREST STATEMENT**

None.

For peer review only

1  
2  
3 **FIGURE LEGENDS**

4 **Figure 1.** CAM criteria: at least one criteria on each of the 3 rows must be met for a positive  
5 result.  
6

7 **Figure 2.** Flowchart depicting a patient’s timeline during the study.  
8  
9

10  
11  
12  
13  
14  
15  
16  
17  
18  
19  
20  
21  
22  
23  
24  
25  
26  
27  
28  
29  
30  
31  
32  
33  
34  
35  
36  
37  
38  
39  
40  
41  
42  
43  
44  
45  
46  
47  
48  
49  
50  
51  
52  
53  
54  
55  
56  
57  
58  
59  
60

For peer review only

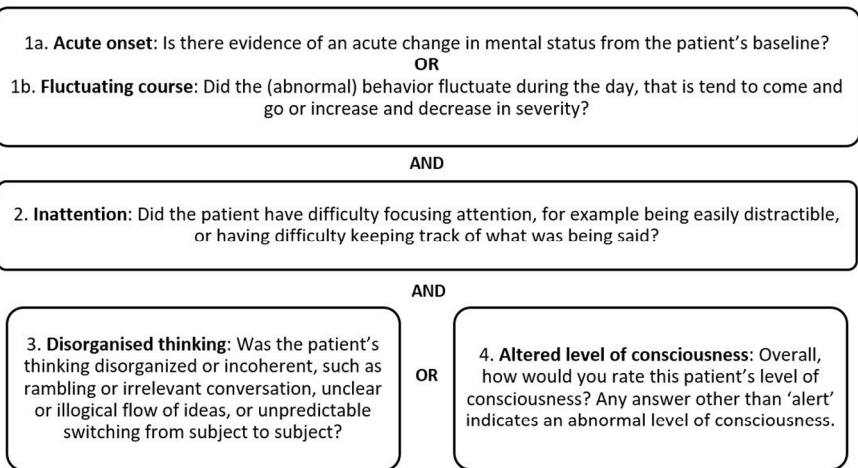

CAM criteria: at least one criteria on each of the 3 rows must be met for a positive result

240x129mm (300 x 300 DPI)

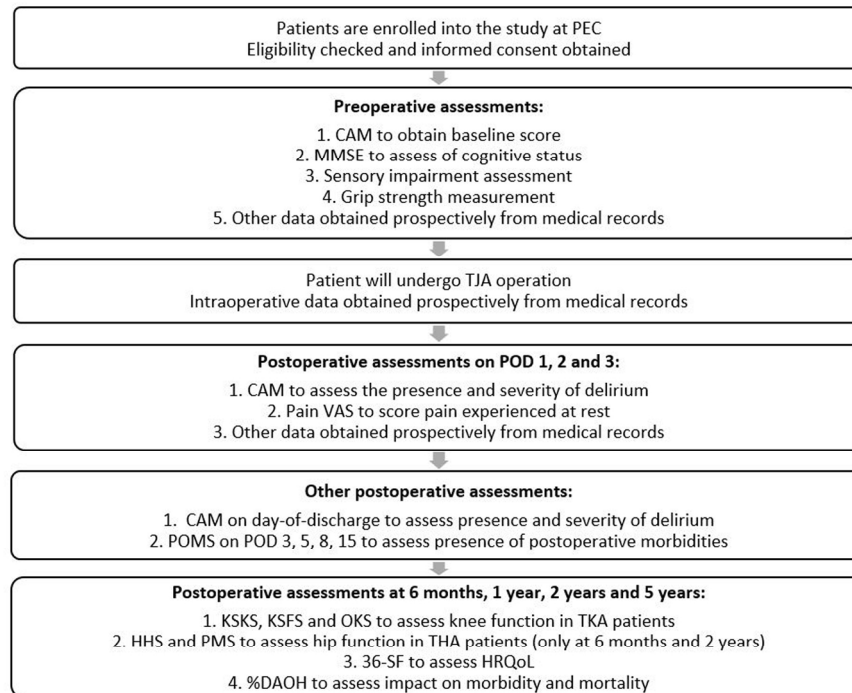

Caption : Flowchart depicting a patient's timeline during the study

180x140mm (300 x 300 DPI)

| Item no. | Original version            | Adapted version                                              | Reasons                                                                      |
|----------|-----------------------------|--------------------------------------------------------------|------------------------------------------------------------------------------|
| 1        | "What is the season?"       | Without looking at your watch, what time is it?"             | There are no seasons in Singapore.                                           |
| 2a       | "What county are we in?";   | "What area/street are we in?";                               | Singapore is a city country; "Singapore" would only the only correct answer. |
| 2b       | "What town/city are we in?" | "Which part of Singapore (North/South/East/West) are we in?" | Singapore is a city country; "Singapore" would only the only correct answer. |

| Item no. | English version                                | Chinese version      | Malay version                                    |
|----------|------------------------------------------------|----------------------|--------------------------------------------------|
| 4        | Spell the word "WORLD" backwards               | 请把这句话倒说一遍 – “天上有月亮”  | Terbalikkan ejaan "DUNIA"                        |
| 7        | Repeat the following – “no ifs, ands, or buts” | 请清除的重复一遍 – “四十四只石狮子” | Ulangan perkataan – “dahulu, kini dan selamanya” |

For peer review only

## Preoperative DCF

| Postoperative Delirium Following Total Joint Arthroplasties among South East Asians                                                                                                                                                                                                                                                                                                                                                                                                                                                                                                                                                                                                                                                                                                                                                                                                                                                                                                                                                                                                                                                                                                                                                                                   |                                                                                                                                                                                                                                                                                                                                                                                                                                                                                                                                                                                                                                                                                                                                                                                                                                                                                                                                                                                                                                                   |  |                          |                       |                          |                          |                          |                             |            |  |                          |                         |                          |                          |                          |          |              |  |                          |                           |            |  |                          |                       |           |  |                          |                      |                          |                    |                          |                                  |                  |  |                          |                                        |  |
|-----------------------------------------------------------------------------------------------------------------------------------------------------------------------------------------------------------------------------------------------------------------------------------------------------------------------------------------------------------------------------------------------------------------------------------------------------------------------------------------------------------------------------------------------------------------------------------------------------------------------------------------------------------------------------------------------------------------------------------------------------------------------------------------------------------------------------------------------------------------------------------------------------------------------------------------------------------------------------------------------------------------------------------------------------------------------------------------------------------------------------------------------------------------------------------------------------------------------------------------------------------------------|---------------------------------------------------------------------------------------------------------------------------------------------------------------------------------------------------------------------------------------------------------------------------------------------------------------------------------------------------------------------------------------------------------------------------------------------------------------------------------------------------------------------------------------------------------------------------------------------------------------------------------------------------------------------------------------------------------------------------------------------------------------------------------------------------------------------------------------------------------------------------------------------------------------------------------------------------------------------------------------------------------------------------------------------------|--|--------------------------|-----------------------|--------------------------|--------------------------|--------------------------|-----------------------------|------------|--|--------------------------|-------------------------|--------------------------|--------------------------|--------------------------|----------|--------------|--|--------------------------|---------------------------|------------|--|--------------------------|-----------------------|-----------|--|--------------------------|----------------------|--------------------------|--------------------|--------------------------|----------------------------------|------------------|--|--------------------------|----------------------------------------|--|
| Serial No: _____<br>Date of preoperative assessment: _____                                                                                                                                                                                                                                                                                                                                                                                                                                                                                                                                                                                                                                                                                                                                                                                                                                                                                                                                                                                                                                                                                                                                                                                                            |                                                                                                                                                                                                                                                                                                                                                                                                                                                                                                                                                                                                                                                                                                                                                                                                                                                                                                                                                                                                                                                   |  |                          |                       |                          |                          |                          |                             |            |  |                          |                         |                          |                          |                          |          |              |  |                          |                           |            |  |                          |                       |           |  |                          |                      |                          |                    |                          |                                  |                  |  |                          |                                        |  |
| <b>DEMOGRAPHIC</b><br>Age: _____<br>Gender: Male <input type="checkbox"/> Female <input type="checkbox"/><br>Race: Chinese <input type="checkbox"/> Malay <input type="checkbox"/> Indian <input type="checkbox"/> Others <input type="checkbox"/><br>Language:<br>English <input type="checkbox"/> Mandarin <input type="checkbox"/> Malay <input type="checkbox"/><br>Others _____<br>Highest education completed: _____<br>Height: _____ m<br>Weight: _____ kg<br>BMI: _____                                                                                                                                                                                                                                                                                                                                                                                                                                                                                                                                                                                                                                                                                                                                                                                       | <b>OP DETAILS</b><br>Surgeon: _____<br>Type of Operation:<br>TKR <input type="checkbox"/> THR <input type="checkbox"/><br>Unilateral L <input type="checkbox"/> / R <input type="checkbox"/> OR Bilateral <input type="checkbox"/><br>Primary <input type="checkbox"/> Revision <input type="checkbox"/><br>Pre-operative Dx: _____<br>_____<br>_____<br>Grip Strength: _____                                                                                                                                                                                                                                                                                                                                                                                                                                                                                                                                                                                                                                                                     |  |                          |                       |                          |                          |                          |                             |            |  |                          |                         |                          |                          |                          |          |              |  |                          |                           |            |  |                          |                       |           |  |                          |                      |                          |                    |                          |                                  |                  |  |                          |                                        |  |
| <b>BACKGROUND MEDICAL CONDITION</b><br>ASA: _____<br>Charlson Comorbidity Index<br>Overall score: _____                                                                                                                                                                                                                                                                                                                                                                                                                                                                                                                                                                                                                                                                                                                                                                                                                                                                                                                                                                                                                                                                                                                                                               | Smoking <input type="checkbox"/><br>Alcoholism <input type="checkbox"/><br>Diabetes:<br>OHGA <input type="checkbox"/> Insulin <input type="checkbox"/><br>Latest HbA1c _____<br>Chronic kidney disease <input type="checkbox"/><br>Pre-existing dementia <input type="checkbox"/><br>Other pre-existing neurological problems<br><input type="checkbox"/> CVA<br><input type="checkbox"/> Parkinson Disease<br><input type="checkbox"/> Depression<br><input type="checkbox"/> Anxiety<br><input type="checkbox"/> Schizophrenia and other delusional disorders<br>Visual impairment <input type="checkbox"/><br>Hearing impairment <input type="checkbox"/><br>STOPBANG score _____<br><b>Chronic Medications</b><br>Benzodiazepine <input type="checkbox"/><br>Statin <input type="checkbox"/><br>Tramadol <input type="checkbox"/> Oxynorm <input type="checkbox"/><br>Anti-depressants<br>Tricyclics <input type="checkbox"/> SSRI <input type="checkbox"/> SNRI <input type="checkbox"/><br>MOAI <input type="checkbox"/><br>Anti-psychotics |  |                          |                       |                          |                          |                          |                             |            |  |                          |                         |                          |                          |                          |          |              |  |                          |                           |            |  |                          |                       |           |  |                          |                      |                          |                    |                          |                                  |                  |  |                          |                                        |  |
| <table border="1"> <tr> <td><b>CVS</b></td> <td></td> </tr> <tr> <td><input type="checkbox"/></td> <td>Myocardial infarction</td> </tr> <tr> <td><input type="checkbox"/></td> <td>Congestive heart failure</td> </tr> <tr> <td><input type="checkbox"/></td> <td>Peripheral vascular disease</td> </tr> <tr> <td><b>CNS</b></td> <td></td> </tr> <tr> <td><input type="checkbox"/></td> <td>Cerebrovascular disease</td> </tr> <tr> <td><input type="checkbox"/></td> <td>Hemiplegia or paraplegia</td> </tr> <tr> <td><input type="checkbox"/></td> <td>Dementia</td> </tr> <tr> <td><b>Respi</b></td> <td></td> </tr> <tr> <td><input type="checkbox"/></td> <td>Chronic pulmonary disease</td> </tr> <tr> <td><b>MSK</b></td> <td></td> </tr> <tr> <td><input type="checkbox"/></td> <td>Rheumatologic disease</td> </tr> <tr> <td><b>GI</b></td> <td></td> </tr> <tr> <td><input type="checkbox"/></td> <td>Peptic ulcer disease</td> </tr> <tr> <td><input type="checkbox"/></td> <td>Mild liver disease</td> </tr> <tr> <td><input type="checkbox"/></td> <td>Moderate or severe liver disease</td> </tr> <tr> <td><b>Endocrine</b></td> <td></td> </tr> <tr> <td><input type="checkbox"/></td> <td>Diabetes without chronic complications</td> </tr> </table> | <b>CVS</b>                                                                                                                                                                                                                                                                                                                                                                                                                                                                                                                                                                                                                                                                                                                                                                                                                                                                                                                                                                                                                                        |  | <input type="checkbox"/> | Myocardial infarction | <input type="checkbox"/> | Congestive heart failure | <input type="checkbox"/> | Peripheral vascular disease | <b>CNS</b> |  | <input type="checkbox"/> | Cerebrovascular disease | <input type="checkbox"/> | Hemiplegia or paraplegia | <input type="checkbox"/> | Dementia | <b>Respi</b> |  | <input type="checkbox"/> | Chronic pulmonary disease | <b>MSK</b> |  | <input type="checkbox"/> | Rheumatologic disease | <b>GI</b> |  | <input type="checkbox"/> | Peptic ulcer disease | <input type="checkbox"/> | Mild liver disease | <input type="checkbox"/> | Moderate or severe liver disease | <b>Endocrine</b> |  | <input type="checkbox"/> | Diabetes without chronic complications |  |
| <b>CVS</b>                                                                                                                                                                                                                                                                                                                                                                                                                                                                                                                                                                                                                                                                                                                                                                                                                                                                                                                                                                                                                                                                                                                                                                                                                                                            |                                                                                                                                                                                                                                                                                                                                                                                                                                                                                                                                                                                                                                                                                                                                                                                                                                                                                                                                                                                                                                                   |  |                          |                       |                          |                          |                          |                             |            |  |                          |                         |                          |                          |                          |          |              |  |                          |                           |            |  |                          |                       |           |  |                          |                      |                          |                    |                          |                                  |                  |  |                          |                                        |  |
| <input type="checkbox"/>                                                                                                                                                                                                                                                                                                                                                                                                                                                                                                                                                                                                                                                                                                                                                                                                                                                                                                                                                                                                                                                                                                                                                                                                                                              | Myocardial infarction                                                                                                                                                                                                                                                                                                                                                                                                                                                                                                                                                                                                                                                                                                                                                                                                                                                                                                                                                                                                                             |  |                          |                       |                          |                          |                          |                             |            |  |                          |                         |                          |                          |                          |          |              |  |                          |                           |            |  |                          |                       |           |  |                          |                      |                          |                    |                          |                                  |                  |  |                          |                                        |  |
| <input type="checkbox"/>                                                                                                                                                                                                                                                                                                                                                                                                                                                                                                                                                                                                                                                                                                                                                                                                                                                                                                                                                                                                                                                                                                                                                                                                                                              | Congestive heart failure                                                                                                                                                                                                                                                                                                                                                                                                                                                                                                                                                                                                                                                                                                                                                                                                                                                                                                                                                                                                                          |  |                          |                       |                          |                          |                          |                             |            |  |                          |                         |                          |                          |                          |          |              |  |                          |                           |            |  |                          |                       |           |  |                          |                      |                          |                    |                          |                                  |                  |  |                          |                                        |  |
| <input type="checkbox"/>                                                                                                                                                                                                                                                                                                                                                                                                                                                                                                                                                                                                                                                                                                                                                                                                                                                                                                                                                                                                                                                                                                                                                                                                                                              | Peripheral vascular disease                                                                                                                                                                                                                                                                                                                                                                                                                                                                                                                                                                                                                                                                                                                                                                                                                                                                                                                                                                                                                       |  |                          |                       |                          |                          |                          |                             |            |  |                          |                         |                          |                          |                          |          |              |  |                          |                           |            |  |                          |                       |           |  |                          |                      |                          |                    |                          |                                  |                  |  |                          |                                        |  |
| <b>CNS</b>                                                                                                                                                                                                                                                                                                                                                                                                                                                                                                                                                                                                                                                                                                                                                                                                                                                                                                                                                                                                                                                                                                                                                                                                                                                            |                                                                                                                                                                                                                                                                                                                                                                                                                                                                                                                                                                                                                                                                                                                                                                                                                                                                                                                                                                                                                                                   |  |                          |                       |                          |                          |                          |                             |            |  |                          |                         |                          |                          |                          |          |              |  |                          |                           |            |  |                          |                       |           |  |                          |                      |                          |                    |                          |                                  |                  |  |                          |                                        |  |
| <input type="checkbox"/>                                                                                                                                                                                                                                                                                                                                                                                                                                                                                                                                                                                                                                                                                                                                                                                                                                                                                                                                                                                                                                                                                                                                                                                                                                              | Cerebrovascular disease                                                                                                                                                                                                                                                                                                                                                                                                                                                                                                                                                                                                                                                                                                                                                                                                                                                                                                                                                                                                                           |  |                          |                       |                          |                          |                          |                             |            |  |                          |                         |                          |                          |                          |          |              |  |                          |                           |            |  |                          |                       |           |  |                          |                      |                          |                    |                          |                                  |                  |  |                          |                                        |  |
| <input type="checkbox"/>                                                                                                                                                                                                                                                                                                                                                                                                                                                                                                                                                                                                                                                                                                                                                                                                                                                                                                                                                                                                                                                                                                                                                                                                                                              | Hemiplegia or paraplegia                                                                                                                                                                                                                                                                                                                                                                                                                                                                                                                                                                                                                                                                                                                                                                                                                                                                                                                                                                                                                          |  |                          |                       |                          |                          |                          |                             |            |  |                          |                         |                          |                          |                          |          |              |  |                          |                           |            |  |                          |                       |           |  |                          |                      |                          |                    |                          |                                  |                  |  |                          |                                        |  |
| <input type="checkbox"/>                                                                                                                                                                                                                                                                                                                                                                                                                                                                                                                                                                                                                                                                                                                                                                                                                                                                                                                                                                                                                                                                                                                                                                                                                                              | Dementia                                                                                                                                                                                                                                                                                                                                                                                                                                                                                                                                                                                                                                                                                                                                                                                                                                                                                                                                                                                                                                          |  |                          |                       |                          |                          |                          |                             |            |  |                          |                         |                          |                          |                          |          |              |  |                          |                           |            |  |                          |                       |           |  |                          |                      |                          |                    |                          |                                  |                  |  |                          |                                        |  |
| <b>Respi</b>                                                                                                                                                                                                                                                                                                                                                                                                                                                                                                                                                                                                                                                                                                                                                                                                                                                                                                                                                                                                                                                                                                                                                                                                                                                          |                                                                                                                                                                                                                                                                                                                                                                                                                                                                                                                                                                                                                                                                                                                                                                                                                                                                                                                                                                                                                                                   |  |                          |                       |                          |                          |                          |                             |            |  |                          |                         |                          |                          |                          |          |              |  |                          |                           |            |  |                          |                       |           |  |                          |                      |                          |                    |                          |                                  |                  |  |                          |                                        |  |
| <input type="checkbox"/>                                                                                                                                                                                                                                                                                                                                                                                                                                                                                                                                                                                                                                                                                                                                                                                                                                                                                                                                                                                                                                                                                                                                                                                                                                              | Chronic pulmonary disease                                                                                                                                                                                                                                                                                                                                                                                                                                                                                                                                                                                                                                                                                                                                                                                                                                                                                                                                                                                                                         |  |                          |                       |                          |                          |                          |                             |            |  |                          |                         |                          |                          |                          |          |              |  |                          |                           |            |  |                          |                       |           |  |                          |                      |                          |                    |                          |                                  |                  |  |                          |                                        |  |
| <b>MSK</b>                                                                                                                                                                                                                                                                                                                                                                                                                                                                                                                                                                                                                                                                                                                                                                                                                                                                                                                                                                                                                                                                                                                                                                                                                                                            |                                                                                                                                                                                                                                                                                                                                                                                                                                                                                                                                                                                                                                                                                                                                                                                                                                                                                                                                                                                                                                                   |  |                          |                       |                          |                          |                          |                             |            |  |                          |                         |                          |                          |                          |          |              |  |                          |                           |            |  |                          |                       |           |  |                          |                      |                          |                    |                          |                                  |                  |  |                          |                                        |  |
| <input type="checkbox"/>                                                                                                                                                                                                                                                                                                                                                                                                                                                                                                                                                                                                                                                                                                                                                                                                                                                                                                                                                                                                                                                                                                                                                                                                                                              | Rheumatologic disease                                                                                                                                                                                                                                                                                                                                                                                                                                                                                                                                                                                                                                                                                                                                                                                                                                                                                                                                                                                                                             |  |                          |                       |                          |                          |                          |                             |            |  |                          |                         |                          |                          |                          |          |              |  |                          |                           |            |  |                          |                       |           |  |                          |                      |                          |                    |                          |                                  |                  |  |                          |                                        |  |
| <b>GI</b>                                                                                                                                                                                                                                                                                                                                                                                                                                                                                                                                                                                                                                                                                                                                                                                                                                                                                                                                                                                                                                                                                                                                                                                                                                                             |                                                                                                                                                                                                                                                                                                                                                                                                                                                                                                                                                                                                                                                                                                                                                                                                                                                                                                                                                                                                                                                   |  |                          |                       |                          |                          |                          |                             |            |  |                          |                         |                          |                          |                          |          |              |  |                          |                           |            |  |                          |                       |           |  |                          |                      |                          |                    |                          |                                  |                  |  |                          |                                        |  |
| <input type="checkbox"/>                                                                                                                                                                                                                                                                                                                                                                                                                                                                                                                                                                                                                                                                                                                                                                                                                                                                                                                                                                                                                                                                                                                                                                                                                                              | Peptic ulcer disease                                                                                                                                                                                                                                                                                                                                                                                                                                                                                                                                                                                                                                                                                                                                                                                                                                                                                                                                                                                                                              |  |                          |                       |                          |                          |                          |                             |            |  |                          |                         |                          |                          |                          |          |              |  |                          |                           |            |  |                          |                       |           |  |                          |                      |                          |                    |                          |                                  |                  |  |                          |                                        |  |
| <input type="checkbox"/>                                                                                                                                                                                                                                                                                                                                                                                                                                                                                                                                                                                                                                                                                                                                                                                                                                                                                                                                                                                                                                                                                                                                                                                                                                              | Mild liver disease                                                                                                                                                                                                                                                                                                                                                                                                                                                                                                                                                                                                                                                                                                                                                                                                                                                                                                                                                                                                                                |  |                          |                       |                          |                          |                          |                             |            |  |                          |                         |                          |                          |                          |          |              |  |                          |                           |            |  |                          |                       |           |  |                          |                      |                          |                    |                          |                                  |                  |  |                          |                                        |  |
| <input type="checkbox"/>                                                                                                                                                                                                                                                                                                                                                                                                                                                                                                                                                                                                                                                                                                                                                                                                                                                                                                                                                                                                                                                                                                                                                                                                                                              | Moderate or severe liver disease                                                                                                                                                                                                                                                                                                                                                                                                                                                                                                                                                                                                                                                                                                                                                                                                                                                                                                                                                                                                                  |  |                          |                       |                          |                          |                          |                             |            |  |                          |                         |                          |                          |                          |          |              |  |                          |                           |            |  |                          |                       |           |  |                          |                      |                          |                    |                          |                                  |                  |  |                          |                                        |  |
| <b>Endocrine</b>                                                                                                                                                                                                                                                                                                                                                                                                                                                                                                                                                                                                                                                                                                                                                                                                                                                                                                                                                                                                                                                                                                                                                                                                                                                      |                                                                                                                                                                                                                                                                                                                                                                                                                                                                                                                                                                                                                                                                                                                                                                                                                                                                                                                                                                                                                                                   |  |                          |                       |                          |                          |                          |                             |            |  |                          |                         |                          |                          |                          |          |              |  |                          |                           |            |  |                          |                       |           |  |                          |                      |                          |                    |                          |                                  |                  |  |                          |                                        |  |
| <input type="checkbox"/>                                                                                                                                                                                                                                                                                                                                                                                                                                                                                                                                                                                                                                                                                                                                                                                                                                                                                                                                                                                                                                                                                                                                                                                                                                              | Diabetes without chronic complications                                                                                                                                                                                                                                                                                                                                                                                                                                                                                                                                                                                                                                                                                                                                                                                                                                                                                                                                                                                                            |  |                          |                       |                          |                          |                          |                             |            |  |                          |                         |                          |                          |                          |          |              |  |                          |                           |            |  |                          |                       |           |  |                          |                      |                          |                    |                          |                                  |                  |  |                          |                                        |  |

|                                                                                                                                                                                                |                                                 |                                        |                                     |
|------------------------------------------------------------------------------------------------------------------------------------------------------------------------------------------------|-------------------------------------------------|----------------------------------------|-------------------------------------|
| <input type="checkbox"/>                                                                                                                                                                       | Diabetes with chronic complications             | Haloperidol <input type="checkbox"/>   | Quetiapine <input type="checkbox"/> |
| <b>Renal</b>                                                                                                                                                                                   |                                                 | Olanzapine <input type="checkbox"/>    | Clozapine <input type="checkbox"/>  |
| <input type="checkbox"/>                                                                                                                                                                       | Mild Renal disease                              | <b>Preoperative Laboratory Results</b> |                                     |
| <input type="checkbox"/>                                                                                                                                                                       | Moderate or severe renal disease                | Hemoglobin _____                       |                                     |
| <b>Malignancy</b>                                                                                                                                                                              |                                                 | MCV _____                              |                                     |
| <input type="checkbox"/>                                                                                                                                                                       | Any malignancy, including leukemia and lymphoma | RDW _____                              |                                     |
| <input type="checkbox"/>                                                                                                                                                                       | Non-metastatic solid tumour                     | MCV _____                              |                                     |
| <input type="checkbox"/>                                                                                                                                                                       | Metastatic solid tumor                          | MCHC _____                             |                                     |
| <b>Immunological</b>                                                                                                                                                                           |                                                 | Urea _____                             |                                     |
| <input type="checkbox"/>                                                                                                                                                                       | AIDS/HIV                                        |                                        |                                     |
| <b>IntraOp</b>                                                                                                                                                                                 |                                                 |                                        |                                     |
| ANA Type: _____                                                                                                                                                                                |                                                 |                                        |                                     |
|                                                                                                                                                                                                |                                                 | <b>Yes</b>                             | <b>No</b>                           |
| Fem N block                                                                                                                                                                                    | <input type="checkbox"/>                        | <input type="checkbox"/>               |                                     |
| Benzo Use:                                                                                                                                                                                     | <input type="checkbox"/>                        | <input type="checkbox"/>               |                                     |
| Atropine Use:                                                                                                                                                                                  | <input type="checkbox"/>                        | <input type="checkbox"/>               |                                     |
| Opioid use                                                                                                                                                                                     | <input type="checkbox"/>                        | <input checked="" type="checkbox"/>    |                                     |
| <b>If yes , dose: _____</b>                                                                                                                                                                    |                                                 |                                        |                                     |
| Dexa use                                                                                                                                                                                       | <input type="checkbox"/>                        | <input type="checkbox"/>               |                                     |
| <b>If yes , dose: _____</b>                                                                                                                                                                    |                                                 |                                        |                                     |
| Promethazine use:                                                                                                                                                                              | <input type="checkbox"/>                        | <input type="checkbox"/>               |                                     |
| Ondansetron:                                                                                                                                                                                   | <input type="checkbox"/>                        | <input type="checkbox"/>               |                                     |
| Blood Transfusion                                                                                                                                                                              | <input type="checkbox"/>                        | <input type="checkbox"/>               |                                     |
| Hypotension                                                                                                                                                                                    | <input type="checkbox"/>                        | <input type="checkbox"/>               |                                     |
| <b>If yes, duration: _____</b>                                                                                                                                                                 |                                                 |                                        |                                     |
| <b>BASELINE CAM</b>                                                                                                                                                                            |                                                 |                                        |                                     |
| 1. Acute onset change in mental status from baseline?                                                                                                                                          |                                                 |                                        |                                     |
| a. Yes <input type="checkbox"/>                                                                                                                                                                |                                                 |                                        |                                     |
| b. No <input type="checkbox"/>                                                                                                                                                                 |                                                 |                                        |                                     |
| c. Uncertain _____                                                                                                                                                                             |                                                 |                                        |                                     |
| 2. Does the patient have difficulty focusing attention, is easily distracted, or has difficulty keeping track of what was being said?                                                          |                                                 |                                        |                                     |
| a. Yes – mild form <input type="checkbox"/> , fluctuating <input type="checkbox"/>                                                                                                             |                                                 |                                        |                                     |
| b. Yes – marked form <input type="checkbox"/> , fluctuating <input type="checkbox"/>                                                                                                           |                                                 |                                        |                                     |
| c. Uncertain _____                                                                                                                                                                             |                                                 |                                        |                                     |
| d. No <input type="checkbox"/>                                                                                                                                                                 |                                                 |                                        |                                     |
| 3. Was the patient's thinking disorganized or incoherent, such as rambling or irrelevant conversation, unclear or illogical flow of ideas, or unpredictable switching from subject to subject? |                                                 |                                        |                                     |
| a. Yes – mild form <input type="checkbox"/> , fluctuating <input type="checkbox"/>                                                                                                             |                                                 |                                        |                                     |



- b. Yes – marked form , fluctuating
  - c. Uncertain \_\_\_\_\_
  - d. No
4. How is the patient’s overall level of consciousness?
- a. Alert (normal)
  - b. Vigilant (hyperalert, overly sensitive to environmental stimuli, startled easily) , fluctuating
  - c. Lethargic (Drowsy, easily aroused) , fluctuating
  - d. Stupor (Difficult to arouse) , fluctuating
  - e. Coma (Unarousable) , fluctuating
  - f. Uncertain \_\_\_\_\_

**BASELINE MINI MENTAL STATE EXAMINATION**

Total score \_\_\_\_\_

Level of consciousness

Alert  Drowsy  Stupor  Coma

|                        | Question                                                                                                                                                                                                                                                        | Score                           |
|------------------------|-----------------------------------------------------------------------------------------------------------------------------------------------------------------------------------------------------------------------------------------------------------------|---------------------------------|
| 1                      | What is the <ul style="list-style-type: none"> <li>• year</li> <li>• month</li> <li>• day of the week</li> <li>• date</li> <li>• current time now (without looking at your watch)?</li> </ul>                                                                   | / 5                             |
| 2                      | What country are we in?<br>What area/street are we in?<br>Which part of Singapore is this place (North, south, east, west or central)<br>Which hospital are we in?<br>Which floor?                                                                              | / 5                             |
| 3                      | Show the objects: ball, flag, tree<br><br>Name 3 objects: 1 second to say each. Then ask the patient all 3 after you have said them. Give 1 point for each correct answer. Then repeat them until he/she learns all 3. Count trials and record.<br>Trials _____ | / 3                             |
| 4                      | Serial 7’s. 1 point for each correct answer. Stop after 5 answers.<br>Alternatively spell “world” backward.                                                                                                                                                     | / 5                             |
| 5                      | Ask for the 3 objects repeated above. Give 1 point for each correct answer.                                                                                                                                                                                     | / 3                             |
| 6                      | Name a pencil and watch.<br>Repeat the following “No ifs, ands, or buts”<br>Follow a 3-stage command:<br>“Take a paper in your hand, fold it in half, and put it on the floor.”<br>Read and obey the following:                                                 | / 2<br>/ 1<br>/ 3<br>/ 1<br>/ 1 |
| <b>CLOSE YOUR EYES</b> |                                                                                                                                                                                                                                                                 |                                 |

1  
2  
3  
4  
5  
6  
7  
8  
9  
10  
11  
12  
13  
14  
15  
16  
17  
18  
19  
20  
21  
22  
23  
24  
25  
26  
27  
28  
29  
30  
31  
32  
33  
34  
35  
36  
37  
38  
39  
40  
41  
42  
43  
44  
45  
46  
47  
48  
49  
50  
51  
52  
53  
54  
55  
56  
57  
58  
59  
60

|  |                                                                                                                |     |
|--|----------------------------------------------------------------------------------------------------------------|-----|
|  | <p>Write a sentence.</p>                                                                                       | / 1 |
|  | <p>Copy the design shown</p> 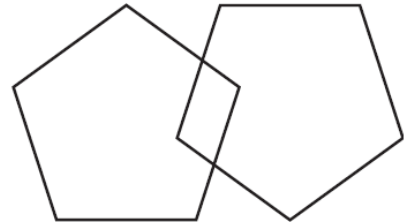 | / 1 |

For peer review only

### Postoperative Morbidity Survey

| Morbidity type   | Criteria                                                                                                                                                                                                                                                                                                      | Source of data      |
|------------------|---------------------------------------------------------------------------------------------------------------------------------------------------------------------------------------------------------------------------------------------------------------------------------------------------------------|---------------------|
| Pulmonary        | Has the patient developed a new requirement for oxygen or respiratory support.                                                                                                                                                                                                                                | Patient observation |
|                  |                                                                                                                                                                                                                                                                                                               | Treatment chart     |
| Infectious       | Currently on antibiotics and/or has had a temperature of >38°C in the last 24 hr.                                                                                                                                                                                                                             | Treatment chart     |
|                  |                                                                                                                                                                                                                                                                                                               | Observation chart   |
| Renal            | Presence of oliguria <500 mL/24 hr; increased serum creatinine (>30% from preoperative level); urinary catheter in situ.                                                                                                                                                                                      | Fluid balance chart |
|                  |                                                                                                                                                                                                                                                                                                               | Biochemistry result |
|                  |                                                                                                                                                                                                                                                                                                               | Patient observation |
| Gastrointestinal | Unable to tolerate an enteral diet for any reason including nausea, vomiting, and abdominal distension (use of antiemetic).                                                                                                                                                                                   | Patient questioning |
|                  |                                                                                                                                                                                                                                                                                                               | Fluid balance chart |
|                  |                                                                                                                                                                                                                                                                                                               | Treatment chart     |
| Cardiovascular   | Diagnostic tests or therapy within the last 24 hr for any of the following: new myocardial infarction or ischemia, hypotension (requiring fluid therapy >200 mL/hr or pharmacological therapy), atrial or ventricular arrhythmias, cardiogenic pulmonary edema, thrombotic event (requiring anticoagulation). | Treatment chart     |
|                  |                                                                                                                                                                                                                                                                                                               | Note review         |
| Neurological     | New focal neurological deficit, confusion, delirium, or coma.                                                                                                                                                                                                                                                 | Note review         |
|                  |                                                                                                                                                                                                                                                                                                               | Patient questioning |
| Hematological    | Requirement for any of the following within the last 24 hr: packed erythrocytes, platelets, fresh-frozen plasma, or cryoprecipitate.                                                                                                                                                                          | Treatment chart     |
|                  |                                                                                                                                                                                                                                                                                                               | Fluid balance chart |
| Wound            | Wound dehiscence requiring surgical exploration or drainage of pus from the operation wound with or without isolation of organisms.                                                                                                                                                                           | Note review         |
|                  |                                                                                                                                                                                                                                                                                                               | Pathology result    |
| Pain             | New postoperative pain significant enough to require parenteral opioids or regional analgesia.                                                                                                                                                                                                                | Treatment chart     |
|                  |                                                                                                                                                                                                                                                                                                               | Patient questioning |

### 36-Item Short Form Health Survey

#### RAND 36-Item Health Survey 1.0 Questionnaire Items

Choose one option for each questionnaire item.

1. In general, would you say your health is:
  - 1 – Excellent
  - 2 - Very good
  - 3 – Good
  - 4 – Fair
  - 5 – Poor
  
2. **Compared to one year ago**, how would you rate your health in general now?
  - 1 - Much better now than one year ago
  - 2 - Somewhat better now than one year ago
  - 3 - About the same
  - 4 - Somewhat worse now than one year ago
  - 5 - Much worse now than one year ago

The following items are about activities you might do during a typical day. Does **your health now limit you** in these activities? If so, how much?

- |                                                                                                            | Yes,<br>limited a<br>lot | Yes,<br>limited a<br>little | No, not<br>limited at<br>all |
|------------------------------------------------------------------------------------------------------------|--------------------------|-----------------------------|------------------------------|
| 3. <b>Vigorous activities</b> , such as running, lifting heavy objects, participating in strenuous sports  | <input type="radio"/> 1  | <input type="radio"/> 2     | <input type="radio"/> 3      |
| 4. <b>Moderate activities</b> , such as moving a table, pushing a vacuum cleaner, bowling, or playing golf | <input type="radio"/> 1  | <input type="radio"/> 2     | <input type="radio"/> 3      |
| 5. Lifting or carrying groceries                                                                           | <input type="radio"/> 1  | <input type="radio"/> 2     | <input type="radio"/> 3      |
| 6. Climbing <b>several</b> flights of stairs                                                               | <input type="radio"/> 1  | <input type="radio"/> 2     | <input type="radio"/> 3      |
| 7. Climbing <b>one</b> flight of stairs                                                                    | <input type="radio"/> 1  | <input type="radio"/> 2     | <input type="radio"/> 3      |
| 8. Bending, kneeling, or stooping                                                                          | <input type="radio"/> 1  | <input type="radio"/> 2     | <input type="radio"/> 3      |
| 9. Walking <b>more than a mile</b>                                                                         | <input type="radio"/> 1  | <input type="radio"/> 2     | <input type="radio"/> 3      |
| 10. Walking <b>several blocks</b>                                                                          | <input type="radio"/> 1  | <input type="radio"/> 2     | <input type="radio"/> 3      |
| 11. Walking <b>one block</b>                                                                               | <input type="radio"/> 1  | <input type="radio"/> 2     | <input type="radio"/> 3      |
| 12. Bathing or dressing yourself                                                                           | <input type="radio"/> 1  | <input type="radio"/> 2     | <input type="radio"/> 3      |

1  
2  
3  
4  
5  
6  
7 During the **past 4 weeks**, have you had any of the following problems with your work or other  
8 regular daily activities **as a result of your physical health**?

- |    | Yes                     | No                      |
|----|-------------------------|-------------------------|
| 9  |                         |                         |
| 10 | <input type="radio"/> 1 | <input type="radio"/> 2 |
| 11 |                         |                         |
| 12 | <input type="radio"/> 1 | <input type="radio"/> 2 |
| 13 |                         |                         |
| 14 | <input type="radio"/> 1 | <input type="radio"/> 2 |
| 15 |                         |                         |
| 16 | <input type="radio"/> 1 | <input type="radio"/> 2 |
| 17 |                         |                         |
| 18 | <input type="radio"/> 1 | <input type="radio"/> 2 |
| 19 |                         |                         |

20  
21  
22  
23 During the **past 4 weeks**, have you had any of the following problems with your work or other  
24 regular daily activities **as a result of any emotional problems** (such as feeling depressed or  
25 anxious)?

- |    | Yes                     | No                      |
|----|-------------------------|-------------------------|
| 26 |                         |                         |
| 27 | <input type="radio"/> 1 | <input type="radio"/> 2 |
| 28 |                         |                         |
| 29 | <input type="radio"/> 1 | <input type="radio"/> 2 |
| 30 |                         |                         |
| 31 | <input type="radio"/> 1 | <input type="radio"/> 2 |
| 32 |                         |                         |

33  
34  
35 20. During the **past 4 weeks**, to what extent has your physical health or emotional problems  
36 interfered with your normal social activities with family, friends, neighbours, or groups?

- 37  1 - Not at all
- 38  2 - Slightly
- 39  3 - Moderately
- 40  4 - Quite a bit
- 41  5 – Extremely

42  
43  
44  
45  
46 21. How much **bodily** pain have you had during the **past 4 weeks**?

- 47  1 - None
- 48  2 - Very mild
- 49  3 - Mild
- 50  4 - Moderate
- 51  5 - Severe
- 52  6 - Very severe

53  
54  
55  
56  
57 22. During the **past 4 weeks**, how much did **pain** interfere with your normal work (including  
58 both work outside the home and housework)?

- 59  1 - Not at all

- 2 - A little bit
- 3 - Moderately
- 4 - Quite a bit
- 5 – Extremely

These questions are about how you feel and how things have been with you **during the past 4 weeks**. For each question, please give the one answer that comes closest to the way you have been feeling.

How much of the time during the **past 4 weeks**...

|                                                                         | All of<br>the<br>time   | Most<br>of the<br>time  | A good<br>bit of<br>the<br>time | Some<br>of the<br>time  | A little<br>of the<br>time | None<br>of the<br>time  |
|-------------------------------------------------------------------------|-------------------------|-------------------------|---------------------------------|-------------------------|----------------------------|-------------------------|
| 23. Did you feel full of pep?                                           | <input type="radio"/> 1 | <input type="radio"/> 2 | <input type="radio"/> 3         | <input type="radio"/> 4 | <input type="radio"/> 5    | <input type="radio"/> 6 |
| 24. Have you been a very nervous person?                                | <input type="radio"/> 1 | <input type="radio"/> 2 | <input type="radio"/> 3         | <input type="radio"/> 4 | <input type="radio"/> 5    | <input type="radio"/> 6 |
| 25. Have you felt so down in the dumps that nothing could cheer you up? | <input type="radio"/> 1 | <input type="radio"/> 2 | <input type="radio"/> 3         | <input type="radio"/> 4 | <input type="radio"/> 5    | <input type="radio"/> 6 |
| 26. Have you felt calm and peaceful?                                    | <input type="radio"/> 1 | <input type="radio"/> 2 | <input type="radio"/> 3         | <input type="radio"/> 4 | <input type="radio"/> 5    | <input type="radio"/> 6 |
| 27. Did you have a lot of energy?                                       | <input type="radio"/> 1 | <input type="radio"/> 2 | <input type="radio"/> 3         | <input type="radio"/> 4 | <input type="radio"/> 5    | <input type="radio"/> 6 |
| 28. Have you felt downhearted and blue?                                 | <input type="radio"/> 1 | <input type="radio"/> 2 | <input type="radio"/> 3         | <input type="radio"/> 4 | <input type="radio"/> 5    | <input type="radio"/> 6 |
| 29. Did you feel worn out?                                              | <input type="radio"/> 1 | <input type="radio"/> 2 | <input type="radio"/> 3         | <input type="radio"/> 4 | <input type="radio"/> 5    | <input type="radio"/> 6 |
| 30. Have you been a happy person?                                       | <input type="radio"/> 1 | <input type="radio"/> 2 | <input type="radio"/> 3         | <input type="radio"/> 4 | <input type="radio"/> 5    | <input type="radio"/> 6 |
| 31. Did you feel tired?                                                 | <input type="radio"/> 1 | <input type="radio"/> 2 | <input type="radio"/> 3         | <input type="radio"/> 4 | <input type="radio"/> 5    | <input type="radio"/> 6 |

32. During the **past 4 weeks**, how much of the time has **your physical health or emotional problems** interfered with your social activities (like visiting with friends, relatives, etc.)?

- 1 - All of the time
- 2 - Most of the time
- 3 - Some of the time
- 4 - A little of the time
- 5 - None of the time

How TRUE or FALSE is **each** of the following statements for you.

|                                                          | Definitely true         | Mostly true             | Don't know              | Mostly false            | Definitely false        |
|----------------------------------------------------------|-------------------------|-------------------------|-------------------------|-------------------------|-------------------------|
| 33. I seem to get sick a little easier than other people | <input type="radio"/> 1 | <input type="radio"/> 2 | <input type="radio"/> 3 | <input type="radio"/> 4 | <input type="radio"/> 5 |
| 34. I am as healthy as anybody I know                    | <input type="radio"/> 1 | <input type="radio"/> 2 | <input type="radio"/> 3 | <input type="radio"/> 4 | <input type="radio"/> 5 |
| 35. I expect my health to get worse                      | <input type="radio"/> 1 | <input type="radio"/> 2 | <input type="radio"/> 3 | <input type="radio"/> 4 | <input type="radio"/> 5 |
| 36. My health is excellent                               | <input type="radio"/> 1 | <input type="radio"/> 2 | <input type="radio"/> 3 | <input type="radio"/> 4 | <input type="radio"/> 5 |

*This tool was developed at RAND Health as part of the Medical Outcomes Study.*

## Postoperative DCF

## Postoperative Delirium Following Total Joint Arthroplasties among South East Asians

Serial No: \_\_\_\_\_

Date of surgery: \_\_\_\_\_

Type of surgery: \_\_\_\_\_

Date of assessment: \_\_\_\_\_

# POD1

### CAM ASSESSMENT

1. Acute onset change in mental status from baseline?
  - a. Yes
  - b. No
  - c. Uncertain \_\_\_\_\_
2. Does the patient have difficulty focusing attention, is easily distracted, or has difficulty keeping track of what was being said?
  - a. Yes – mild form , fluctuating
  - b. Yes – marked form , fluctuating
  - c. Uncertain \_\_\_\_\_
  - d. No
3. Was the patient's thinking disorganized or incoherent, such as rambling or irrelevant conversation, unclear or illogical flow of ideas, or unpredictable switching from subject to subject?
  - a. Yes – mild form , fluctuating
  - b. Yes – marked form , fluctuating
  - c. Uncertain \_\_\_\_\_
  - d. No
4. How is the patient's overall level of consciousness?
  - a. Alert (normal)
  - b. Vigilant (hyperalert, overly sensitive to environmental stimuli, startled easily) , fluctuating
  - c. Lethargic (Drowsy, easily aroused) , fluctuating
  - d. Stupor (Difficult to arouse) , fluctuating
  - e. Coma (Unarousable) , fluctuating
  - f. Uncertain \_\_\_\_\_

### PAIN ASSESSMENT

VAS score at time of assessment (0 – 10): \_\_\_\_\_

### VISUAL/HEARING IMPAIRMENT

Visually impaired Hearing impaired If yes to above, hearing aids? 

### PERIOPERATIVE DETAILS

Tourniquet time: \_\_\_\_\_ minutes

Intra-articular injections:

(i) Tranexamic acid  Dosage:(ii) Morphine  Dosage:



|  |                                                       |
|--|-------------------------------------------------------|
|  | (iii) Marcaine <input type="checkbox"/> Dosage:       |
|  | (iv) Adrenaline <input type="checkbox"/> Dosage:      |
|  | (v) Ketorolac <input type="checkbox"/> Dosage:        |
|  | (vi) Triamcinolone <input type="checkbox"/> Dosage:   |
|  | (vii) Vancomycin <input type="checkbox"/> Dosage:     |
|  | (viii) Normal Saline <input type="checkbox"/> Dosage: |
|  | (ix) Others: _____                                    |

For peer review only

## Postoperative Delirium Following Total Joint Arthroplasties among South East Asians

Serial No: \_\_\_\_\_

# POD2

Date of surgery: \_\_\_\_\_

Type of surgery: \_\_\_\_\_

Date of assessment: \_\_\_\_\_

### CAM ASSESSMENT

5. Acute onset change in mental status from baseline?
  - a. Yes
  - b. No
  - c. Uncertain \_\_\_\_\_
6. Does the patient have difficulty focusing attention, is easily distracted, or has difficulty keeping track of what was being said?
  - a. Yes – mild form , fluctuating
  - b. Yes – marked form , fluctuating
  - c. Uncertain \_\_\_\_\_
  - d. No
7. Was the patient's thinking disorganized or incoherent, such as rambling or irrelevant conversation, unclear or illogical flow of ideas, or unpredictable switching from subject to subject?
  - a. Yes – mild form , fluctuating
  - b. Yes – marked form , fluctuating
  - c. Uncertain \_\_\_\_\_
  - d. No
8. How is the patient's overall level of consciousness?
  - a. Alert (normal)
  - b. Vigilant (hyperalert, overly sensitive to environmental stimuli, startled easily) , fluctuating
  - c. Lethargic (Drowsy, easily aroused) , fluctuating
  - d. Stupor (Difficult to arouse) , fluctuating
  - e. Coma (Unarousable) , fluctuating
  - f. Uncertain \_\_\_\_\_

### PAIN ASSESSMENT

VAS score at time of assessment (0 – 10): \_\_\_\_\_

## Postoperative Delirium Following Total Joint Arthroplasties among South East Asians

Serial No: \_\_\_\_\_

# POD3

Date of surgery: \_\_\_\_\_

Type of surgery: \_\_\_\_\_

Date of assessment: \_\_\_\_\_

### CAM ASSESSMENT

1. Acute onset change in mental status from baseline?
  - a. Yes
  - b. No
  - c. Uncertain \_\_\_\_\_
2. Does the patient have difficulty focusing attention, is easily distracted, or has difficulty keeping track of what was being said?
  - a. Yes – mild form , fluctuating
  - b. Yes – marked form , fluctuating
  - c. Uncertain \_\_\_\_\_
  - d. No
3. Was the patient's thinking disorganized or incoherent, such as rambling or irrelevant conversation, unclear or illogical flow of ideas, or unpredictable switching from subject to subject?
  - a. Yes – mild form , fluctuating
  - b. Yes – marked form , fluctuating
  - c. Uncertain \_\_\_\_\_
  - d. No
4. How is the patient's overall level of consciousness?
  - a. Alert (normal)
  - b. Vigilant (hyperalert, overly sensitive to environmental stimuli, startled easily) , fluctuating
  - c. Lethargic (Drowsy, easily aroused) , fluctuating
  - d. Stupor (Difficult to arouse) , fluctuating
  - e. Coma (Unarousable) , fluctuating
  - f. Uncertain \_\_\_\_\_

### PAIN ASSESSMENT

VAS score at time of assessment (0 – 10): \_\_\_\_\_

## Postoperative Delirium Following Total Joint Arthroplasties among South East Asians

Serial No:

\_\_\_\_\_

Date of surgery:

\_\_\_\_\_

Type of surgery:

\_\_\_\_\_

Date of assessment:

\_\_\_\_\_

# DAY OF DISCHARGE

### POSTOPERATIVE MORBIDITY SURGERY

| Morbidity Type     | Criteria                                                                                                                                                                                                                                                          | Tick if present<br>( ) |
|--------------------|-------------------------------------------------------------------------------------------------------------------------------------------------------------------------------------------------------------------------------------------------------------------|------------------------|
| Pulmonary          | De novo requirement for supplemental oxygen or other respiratory support (e.g. mechanical ventilation or CPAP)                                                                                                                                                    |                        |
| Infectious         | Currently on antibiotics or temperature > 38°C in the last 24h                                                                                                                                                                                                    |                        |
| Renal              | Presence of oliguria (< 500 ml/day), elevated serum creatinine (> 30% from preoperative value), or urinary catheter in place for a nonsurgical reason                                                                                                             |                        |
| Gastrointestinal   | Unable to tolerate an enteral diet (either by mouth or via a feeding tube) for any reason, including nausea, vomiting, and abdominal distension                                                                                                                   |                        |
| Cardiovascular     | Diagnostic tests or therapy within the last 24h for any of the following: de novo myocardial infarction or ischaemia, hypotension (requiring pharmacologic therapy or fluid therapy > 200ml/h), atrial or ventricular arrhythmias, or cardiogenic pulmonary edema |                        |
| Neurologic         | Presence of a de novo focal deficit, coma or confusion and delirium                                                                                                                                                                                               |                        |
| Wound complication | Wound dehiscence requiring surgical exploration or drainage of pus from the operation wound, with or without isolation of organisms                                                                                                                               |                        |
| Haematologic       | Requirement for any of the following within the last 24h: packed erythrocytes, platelets, fresh-frozen plasma, or cryoprecipitate                                                                                                                                 |                        |
| Pain               | Surgical wound pain significant enough to require parenteral opiates or regional analgesia                                                                                                                                                                        |                        |

CPAP: continuous positive airway pressure

STROBE Statement—Checklist of items that should be included in reports of *cohort studies*

|                              | Item No | Recommendation                                                                                                                                                                                    | Page Number |
|------------------------------|---------|---------------------------------------------------------------------------------------------------------------------------------------------------------------------------------------------------|-------------|
| <b>Title and abstract</b>    | 1       | (a) Indicate the study's design with a commonly used term in the title or the abstract                                                                                                            | 1           |
|                              |         | (b) Provide in the abstract an informative and balanced summary of what was done and what was found                                                                                               | 5           |
| <b>Introduction</b>          |         |                                                                                                                                                                                                   |             |
| Background/rationale         | 2       | Explain the scientific background and rationale for the investigation being reported                                                                                                              | 7           |
| Objectives                   | 3       | State specific objectives, including any prespecified hypotheses                                                                                                                                  | 7           |
| <b>Methods</b>               |         |                                                                                                                                                                                                   |             |
| Study design                 | 4       | Present key elements of study design early in the paper                                                                                                                                           | 8           |
| Setting                      | 5       | Describe the setting, locations, and relevant dates, including periods of recruitment, exposure, follow-up, and data collection                                                                   | 8-13        |
| Participants                 | 6       | (a) Give the eligibility criteria, and the sources and methods of selection of participants. Describe methods of follow-up                                                                        | 8           |
|                              |         | (b) For matched studies, give matching criteria and number of exposed and unexposed                                                                                                               | -           |
| Variables                    | 7       | Clearly define all outcomes, exposures, predictors, potential confounders, and effect modifiers. Give diagnostic criteria, if applicable                                                          | 8-13        |
| Data sources/<br>measurement | 8*      | For each variable of interest, give sources of data and details of methods of assessment (measurement). Describe comparability of assessment methods if there is more than one group              | 8-13        |
| Bias                         | 9       | Describe any efforts to address potential sources of bias                                                                                                                                         | 8           |
| Study size                   | 10      | Explain how the study size was arrived at                                                                                                                                                         | 13-14       |
| Quantitative variables       | 11      | Explain how quantitative variables were handled in the analyses. If applicable, describe which groupings were chosen and why                                                                      | 14          |
| Statistical methods          | 12      | (a) Describe all statistical methods, including those used to control for confounding                                                                                                             | 14          |
|                              |         | (b) Describe any methods used to examine subgroups and interactions                                                                                                                               | 14          |
|                              |         | (c) Explain how missing data were addressed                                                                                                                                                       | -           |
|                              |         | (d) If applicable, explain how loss to follow-up was addressed                                                                                                                                    | -           |
|                              |         | (e) Describe any sensitivity analyses                                                                                                                                                             | 14          |
| <b>Results</b>               |         |                                                                                                                                                                                                   |             |
| Participants                 | 13*     | (a) Report numbers of individuals at each stage of study—eg numbers potentially eligible, examined for eligibility, confirmed eligible, included in the study, completing follow-up, and analysed | -           |
|                              |         | (b) Give reasons for non-participation at each stage                                                                                                                                              | -           |
|                              |         | (c) Consider use of a flow diagram                                                                                                                                                                | -           |
| Descriptive data             | 14*     | (a) Give characteristics of study participants (eg demographic, clinical, social) and information on exposures and potential confounders                                                          | -           |
|                              |         | (b) Indicate number of participants with missing data for each variable of interest                                                                                                               | -           |
|                              |         | (c) Summarise follow-up time (eg, average and total amount)                                                                                                                                       | -           |
| Outcome data                 | 15*     | Report numbers of outcome events or summary measures over time                                                                                                                                    | -           |
| Main results                 | 16      | (a) Give unadjusted estimates and, if applicable, confounder-adjusted estimates and their precision (eg, 95% confidence interval). Make clear                                                     | -           |

|                          |    |                                                                                                                                                                            |    |
|--------------------------|----|----------------------------------------------------------------------------------------------------------------------------------------------------------------------------|----|
|                          |    | which confounders were adjusted for and why they were included                                                                                                             |    |
|                          |    | (b) Report category boundaries when continuous variables were categorized                                                                                                  | -  |
|                          |    | (c) If relevant, consider translating estimates of relative risk into absolute risk for a meaningful time period                                                           | -  |
| Other analyses           | 17 | Report other analyses done—eg analyses of subgroups and interactions, and sensitivity analyses                                                                             | -  |
| <b>Discussion</b>        |    |                                                                                                                                                                            |    |
| Key results              | 18 | Summarise key results with reference to study objectives                                                                                                                   | -  |
| Limitations              | 19 | Discuss limitations of the study, taking into account sources of potential bias or imprecision. Discuss both direction and magnitude of any potential bias                 | -  |
| Interpretation           | 20 | Give a cautious overall interpretation of results considering objectives, limitations, multiplicity of analyses, results from similar studies, and other relevant evidence | -  |
| Generalisability         | 21 | Discuss the generalisability (external validity) of the study results                                                                                                      | -  |
| <b>Other information</b> |    |                                                                                                                                                                            |    |
| Funding                  | 22 | Give the source of funding and the role of the funders for the present study and, if applicable, for the original study on which the present article is based              | 19 |

\*Give information separately for exposed and unexposed groups.

**Note:** An Explanation and Elaboration article discusses each checklist item and gives methodological background and published examples of transparent reporting. The STROBE checklist is best used in conjunction with this article (freely available on the Web sites of PLoS Medicine at <http://www.plosmedicine.org/>, Annals of Internal Medicine at <http://www.annals.org/>, and Epidemiology at <http://www.epidem.com/>). Information on the STROBE Initiative is available at <http://www.strobe-statement.org>.

# BMJ Open

## Protocol for a Single-Centre Prospective Observational Study of Postoperative Delirium Following Total Joint Arthroplasties among South East Asians

|                                 |                                                                                                                                                                                                                                                                                                                                                                                                                                                                                                                                                                                                                                       |
|---------------------------------|---------------------------------------------------------------------------------------------------------------------------------------------------------------------------------------------------------------------------------------------------------------------------------------------------------------------------------------------------------------------------------------------------------------------------------------------------------------------------------------------------------------------------------------------------------------------------------------------------------------------------------------|
| Journal:                        | <i>BMJ Open</i>                                                                                                                                                                                                                                                                                                                                                                                                                                                                                                                                                                                                                       |
| Manuscript ID                   | bmjopen-2017-019426.R2                                                                                                                                                                                                                                                                                                                                                                                                                                                                                                                                                                                                                |
| Article Type:                   | Protocol                                                                                                                                                                                                                                                                                                                                                                                                                                                                                                                                                                                                                              |
| Date Submitted by the Author:   | 26-Jan-2018                                                                                                                                                                                                                                                                                                                                                                                                                                                                                                                                                                                                                           |
| Complete List of Authors:       | abdullah, hairil; Singapore General Hospital, Department of Anaesthesiology<br>Tan, Sapphire; University of Cambridge Pembroke College<br>Lee, Si Jia; Singapore General Hospital, Department of Anaesthesiology<br>Rahmatullah Bin Abd Razak, Hamid; Singapore General Hospital,<br>Department of Orthopaedic Surgery<br>Seet, Rachel; Singapore General Hospital, Department of Anaesthesiology<br>Ying, Hao; Singapore General Hospital, Health Services Research Unit<br>Sethi, Ervin; Singapore General Hospital, Department of Orthopaedic<br>Surgery<br>Sim, Eileen; Singapore General Hospital, Department of Anaesthesiology |
| <b>Primary Subject Heading</b>: | Anaesthesia                                                                                                                                                                                                                                                                                                                                                                                                                                                                                                                                                                                                                           |
| Secondary Subject Heading:      | Geriatric medicine, Mental health, Anaesthesia                                                                                                                                                                                                                                                                                                                                                                                                                                                                                                                                                                                        |
| Keywords:                       | postoperative, delirium, total joint arthroplasty, incidence                                                                                                                                                                                                                                                                                                                                                                                                                                                                                                                                                                          |
|                                 |                                                                                                                                                                                                                                                                                                                                                                                                                                                                                                                                                                                                                                       |

SCHOLARONE™  
Manuscripts

**TITLE**

Protocol for a Single-Centre Prospective Observational Study of Postoperative Delirium Following Total Joint Arthroplasties among South East Asians

Hairil Rizal Abdullah<sup>1</sup>, Sapphire RouXi Tan<sup>2</sup>, Si Jia Lee<sup>3</sup>, Hamid Rahmatullah Bin Abd Razak<sup>4</sup>, Rachel Huiqi Seet<sup>5</sup>, Ying Hao<sup>6</sup>, Ervin Sethi<sup>7</sup>, Eileen Yilin Sim<sup>3</sup>

<sup>1</sup>Consultant  
Department of Anaesthesiology  
Singapore General Hospital  
Adjunct Assistant Professor  
Duke-NUS Medical School  
Singapore

<sup>2</sup>Medical Student  
University of Cambridge  
Cambridge, United Kingdom

<sup>3</sup>Senior Resident  
Department of Anaesthesiology  
Singapore General Hospital  
Singapore

<sup>4</sup>Senior Resident  
Department of Orthopaedic Surgery  
Singapore General Hospital  
Singapore

<sup>5</sup>Medical Officer  
Department of Anaesthesiology  
Singapore General Hospital  
Singapore

<sup>6</sup>PhD, Research Fellow II  
Health Services Research Unit, Division of Medicine  
Singapore General Hospital  
Singapore

<sup>7</sup>House Officer  
Department of Orthopaedic Surgery



1  
2  
3 Singapore General Hospital  
4 Singapore  
5  
6

7 **\*Please address correspondence to:**

8 Hairil Rizal Abdullah  
9 Department of Anaesthesiology  
10 Singapore General Hospital  
11 Outram Road  
12 Singapore 169608  
13 Email : hairil.rizal.abdullah@singhealth.com.sg  
14 Telephone: (65)63265519  
15  
16

17  
18 **Word count:** 3421  
19  
20

21  
22 **Keywords:** postoperative, delirium, total joint arthroplasty, incidence  
23  
24  
25  
26  
27  
28  
29  
30  
31  
32  
33  
34  
35  
36  
37  
38  
39  
40  
41  
42  
43  
44  
45  
46  
47  
48  
49  
50  
51  
52  
53  
54  
55  
56  
57  
58  
59  
60

**CONTRIBUTORSHIP STATEMENT**

| <b>Author</b>                   | <b>Role/Responsibility</b>                                                                                                                                                                                                                                                                                                                                      |
|---------------------------------|-----------------------------------------------------------------------------------------------------------------------------------------------------------------------------------------------------------------------------------------------------------------------------------------------------------------------------------------------------------------|
| Hairil Rizal Abdullah           | Designed and conceptualized study<br>Prepared draft manuscript<br>Revised draft manuscript<br>Approved final manuscript for submission<br>Statistical calculations<br>Agrees to be accountable for all aspects of the work in ensuring that questions related to the accuracy or integrity of any part of the work are appropriately investigated and resolved. |
| Sapphire RouXi Tan              | Designed and conceptualized study<br>Prepared draft manuscript<br>Revised draft manuscript<br>Approved final manuscript for submission<br>Statistical calculations<br>Agrees to be accountable for all aspects of the work in ensuring that questions related to the accuracy or integrity of any part of the work are appropriately investigated and resolved. |
| Si Jia Lee                      | Designed and conceptualized study<br>Revised draft manuscript<br>Approved final manuscript for submission<br>Agrees to be accountable for all aspects of the work in ensuring that questions related to the accuracy or integrity of any part of the work are appropriately investigated and resolved.                                                          |
| Hamid Rahmatullah Bin Abd Razak | Designed and conceptualized study<br>Revised draft manuscript<br>Approved final manuscript for submission<br>Agrees to be accountable for all aspects of the work in ensuring that questions related to the accuracy or integrity of any part of the work are appropriately investigated and resolved.                                                          |
| Rachel Huiqi Seet               | Designed and conceptualized study<br>Revised draft manuscript<br>Approved final manuscript for submission<br>Agrees to be accountable for all aspects of the work in ensuring that questions related to the accuracy or integrity of any part of the work are appropriately investigated and resolved.                                                          |
| Ying Hao                        | Designed and conceptualized study                                                                                                                                                                                                                                                                                                                               |

|                  |                                                                                                                                                                                                                                                                                                        |
|------------------|--------------------------------------------------------------------------------------------------------------------------------------------------------------------------------------------------------------------------------------------------------------------------------------------------------|
|                  | Revised draft manuscript<br>Approved final manuscript for submission<br>Statistical calculations<br>Agrees to be accountable for all aspects of the work in ensuring that questions related to the accuracy or integrity of any part of the work are appropriately investigated and resolved.          |
| Ervin Sethi      | Designed and conceptualized study<br>Revised draft manuscript<br>Approved final manuscript for submission<br>Agrees to be accountable for all aspects of the work in ensuring that questions related to the accuracy or integrity of any part of the work are appropriately investigated and resolved. |
| Eileen Yilin Sim | Designed and conceptualized study<br>Revised draft manuscript<br>Approved final manuscript for submission<br>Agrees to be accountable for all aspects of the work in ensuring that questions related to the accuracy or integrity of any part of the work are appropriately investigated and resolved. |

## ABSTRACT

### Introduction

Postoperative delirium is a serious and common complication in older adults following Total Joint Arthroplasties (TJA). It is associated with increased risk of postoperative complications, mortality, length of hospital stay and postdischarge institutionalisation. Thus, it has a negative impact on the health-related quality of life of the patient and poses a large economic burden. This study aims to characterise the incidence of postoperative delirium following TJA in the South East Asian population, and investigate any risk factors or associated outcomes.

### Methods and analysis

This is a single-centre prospective observational study, recruiting patients between 65 and 90 years old undergoing elective Total Knee Arthroplasty or Total Hip Arthroplasty. Exclusion criteria included patients with clinically diagnosed dementia. Preoperative and intraoperative data will be obtained prospectively. The primary outcome will be the presence of postoperative delirium assessed using the Confusion Assessment Method on postoperative day 1, 2, 3 and day-of-discharge. Other secondary outcomes assessed postoperatively will include hospital outcomes, pain at rest, knee and hip function, health-related quality of life and POMS-defined morbidity. Data will be analysed to calculate the incidence of postoperative delirium. Potential risk factors and any associated outcomes of postoperative delirium will also be determined.

### Ethics and dissemination

This study has been approved by the Singapore General Hospital Institutional Review Board (SGH IRB) (CIRB Ref: 2017/2467) and is registered on the ClinicalTrials.gov registry (Identified: NCT03260218). An informed consent form will be signed by all participants before recruitment and translators will be made available to non-English speaking participants. The results of this study will be presented at international conferences and submitted to a peer-reviewed journal. The data collected will also be made available in a public data repository.

## STRENGTHS AND LIMITATIONS

### Strengths

1. This study is the first to evaluate the incidence of postoperative delirium in the elderly above 65 years old following TKA and THA in Singapore.
2. Association of variables to occurrence of postoperative delirium that have not been well studied such as hand grip strength, STOP-Bang score and long-term outcomes including knee function and HRQoL will be analysed.
3. The Confusion Assessment Method (CAM) will be used, which is a gold standard measure for detection of delirium.

### Limitations

1. The study is conducted in a single centre in Singapore which may limit the generalisability of the results of the study.
2. Delirium will be only assessed once a day, and the presence of delirium may be missed due to the fluctuating nature of the condition.

## INTRODUCTION

Delirium is a neurocognitive disorder characterised by a disturbance in attention, level of consciousness and cognition, in which symptoms are acute in onset and may fluctuate in severity throughout the day<sup>1</sup>. Delirium is a common perioperative complication in older adults following total joint arthroplasty (TJA). The incidence of postoperative delirium following TJA may be as high as 17%<sup>2</sup>, although there is no data from the South-East Asian population, exposing a knowledge gap.

Patients with delirium after any surgery have an increased risk of major postoperative complications and increased mortality<sup>3,4</sup>. They also experience significantly longer hospital stay and are at increased risk of subsequent postdischarge institutionalisation<sup>4-6</sup>, which increases total procedural cost<sup>7</sup>. With the demand of total hip arthroplasty (THA) expected to rise by almost 2-fold and that for total knee arthroplasty (TKA) by almost 7-fold by 2030<sup>8</sup>, postoperative delirium is likely to become a significant health and economic burden. However, the impact of delirium on outcomes after TJA have not been well reported, identifying a potential knowledge gap. Furthermore, due to these various negative outcomes of postoperative delirium, it is important to characterise the risk factors associated with postoperative delirium. Older age has been reported as one of the most important risk factor for developing postoperative delirium<sup>9,10</sup>. According to an existing study, the average age of the population undergoing TJA is 71 years, and majority of patients are 65 years or older (81.3% for TKR and 69.5% for THR)<sup>7</sup>. Thus, the population under study particularly at risk to postoperative delirium. Other important predisposing risk factors include pre-existing cognitive impairment, poor physical status, alcohol abuse<sup>5,9,10</sup>. While these are common risk factors for the TJA population, few studies have investigated if these risk factors also predispose to postoperative delirium following TJA specifically. There is a need to investigate the presence of other risk factors particular to TJA, especially if any are modifiable. As most of such operations are elective, there may be an opportunity to address the modifiable risk factors to optimise the patient prior to the surgery or to implement perioperative management strategies to mitigate the negative outcomes of postoperative delirium.

Given the limited knowledge on the incidence, risk factors and outcomes of postoperative delirium in the South East Asian population, together with the increasing number of older adults undergoing TJA, this study's primary aim is to characterise the incidence of delirium among older adults undergoing elective TJA. Our secondary aim is to identify risk factors of postoperative delirium following elective TJA among the elderly, including demography, comorbidities, clinical laboratory data and drugs used in the perioperative period. Our final aim is to investigate the impact of postoperative delirium on the immediate and longer term postoperative recovery after TJA. Identifying such risk factors and associated clinical or functional outcomes may be important in guiding perioperative care of prospective patients undergoing TJA.

## METHODS AND ANALYSIS

### Study design

Institutional Review Board approval was obtained (Singhealth CIRB 2017/2467) prior to starting the study. This is a single centre, prospective observational study conducted at a tertiary public hospital in Singapore (Singapore General Hospital (SGH)). SGH is the largest hospital in Singapore with 1,597 beds in 2013<sup>11</sup>. 1,500 TKA surgeries were performed in SGH in 2007, accounting for 65% of all TKA surgeries in Singapore<sup>12</sup>.

### Study population

Patients aged between 65 and 90 undergoing elective total joint (hip or knee) replacement surgery in Singapore General Hospital will be screened for eligibility. A minimum age of 65 years old was chosen to be recruited based on the original study which developed and validated CAM<sup>13</sup>. Exclusion criteria includes patients who are unable to give their own consent for the surgery and anaesthesia. Patients with clinically diagnosed dementia will also be excluded from the study as they are deemed not to have capacity for consent.

All eligible patients will be identified from the appointment list of attendees of the preoperative evaluation clinic (PEC) at SGH where the patients attend for preoperative assessment and counselling by the anaesthetists. Patients between 65 and 90 years old undergoing TKA or THA will be approached and invited to enrol into the study. Informed consent will be obtained then.

### Preoperative data

We will collect the patients' baseline characteristics preoperatively. This will allow for the identification of risk factors or correction of confounding factors during analysis of the results.

#### Data on cognitive status

Before the operation, each patient will be interviewed to assess their baseline cognitive status. The Mini-Mental State Examination (MMSE) will be used, which is a 11-question screening tool used to evaluate the cognitive aspects of mental function<sup>14</sup>. It measures domains of cognitive function including memory, attention, language, praxis and visuospatial ability. A score of 0-30 can be obtained with higher values denoting better cognitive function. A score of <24 suggests cognitive impairment. The test was adapted for use in Singapore, and the changes and reasons for the changes shown in the table in Supplementary file 1. In addition, the test will be administered in English, Chinese or Malay, according to the language the participant is most well-versed in. The Chinese version of MMSE that will be used was previously validated in Shanghai<sup>15</sup> and in Singapore<sup>16</sup>. The Malay version of MMSE that will be used was developed by translation from the English version. The Chinese and Malay versions of MMSE have similar test questions and are scored the same way as the English version, but there some differences shown in Supplementary file 2. However, a recent study in Singapore has shown that there were significant ethnic differences in unadjusted MMSE scores using the different versions of MMSE. These differences were not eliminated after accounting for known correlates of MMSE performance such as

1  
2  
3 socioeconomic status, comorbid illnesses, functional health status, and health-related  
4 behaviours<sup>17</sup>.

5  
6 The Confusion Assessment Method (CAM) will also be performed prior to the operation to  
7 obtain the patient's baseline score. CAM is a screening instrument for delirium intended for  
8 use by non-psychiatrically-trained clinicians based on the Diagnostic and Statistical Manual  
9 of Mental Disorders (DSM)-III-R criteria<sup>18</sup>. It involves an interview whereby delirium can be  
10 diagnosed using the CAM algorithm based on 4 criteria – (1) acute onset or fluctuating  
11 course, (2) inattention, (3) disorganised thinking and (4) altered level of consciousness, as  
12 can be seen in Figure 1. Delirium is said to be present if criteria 1 and 2 and either of 3 or 4  
13 are present. CAM has a sensitivity of 94-100%, specificity of 90-95%, and high inter-  
14 observer reliability<sup>13</sup>. This enables a new case of delirium in the postoperative period to be  
15 detected.  
16

### 17 Other data

18  
19 Sensory impairment will be assessed during the preoperative interviews. Patients will be  
20 asked to wear their visual or hearing aids during these interviews. A patient will be  
21 considered to have visual or hearing impairment if the research member conducting the  
22 interview is unable to perform the interview normally due to the sensory impairment, such as  
23 raising his/her voice for a patient with impaired hearing. The preoperative MMSE  
24 assessment provides a useful tool in assessing for visual impairment as it has several vision-  
25 dependent items (naming objects, following a written command, instructions to handle a  
26 piece of paper, writing a sentence, copying a diagram)<sup>19</sup>.  
27  
28

29 The grip strength of each patient will also be measured using the JAMAR® Plus+ Digital  
30 Hand Dynamometer (Sammons Preston Inc, Bolingbrook, IL). Hand dynamometry has  
31 acceptable reliability and validity for measurement of grip strength<sup>20</sup>, which can serve as an  
32 indicator of muscle function and physical fitness. The normative value of hand grip strength  
33 for elderly in Singapore has recently been published, decreasing from 18.6kg and 29.3kg for  
34 females and males respectively in the 65-69 age group to 12.4kg and 18.5kg in the 85+ age  
35 group<sup>21</sup>.  
36  
37

38 The patient baseline characteristics will be obtained from the medical records. All  
39 perioperative data will be prospectively entered into the REDCap™ database. This will  
40 include data regarding patient's demographics, smoking history, alcohol history, pre-existing  
41 medical conditions, preoperative medications.  
42

43 Each patient will also be rated preoperatively by an anaesthesiologist in the PEC based on  
44 the American Society of Anaesthesiologists (ASA) physical status classification<sup>22</sup>. It is a  
45 scale from 1 to 5, where 1 represents a completely healthy fit patient and 5 representing a  
46 moribund patient who is not expected to live 24 hours with or without surgery. For our  
47 analysis, we will be calculating each patient's perioperative risk based on the Charlson  
48 Comorbidity Index (ChCI)<sup>23</sup>. 19 different comorbid medical conditions are assigned weights  
49 of 1, 2, 3 and 6 according to the degree to which they predicted mortality, and the sum of  
50 these values gives the final score. It is a valid method of estimating risk of mortality resulting  
51 from comorbidities<sup>24</sup>. The STOP-Bang score will also be calculated for each patient. The  
52 STOP-Bang questionnaire was a good screening tool for diagnosing obstructive sleep  
53 apnoea, with a sensitivity of 89.0% and accuracy of 79.1%<sup>25</sup>. Preoperative laboratory results,  
54 including data about haemoglobin or creatinine level, will also be collected.  
55  
56  
57  
58  
59



1  
2  
3 Preoperative baseline functional scores for TKA (Oxford Knee Score, Knee Society  
4 Functional Score and Knee Society Knee Score) and for THA (Harris Hip Score and Parker  
5 Mobility Score) will be obtained from the patient by trained staff at the Orthopaedic  
6 Diagnostic Centre (ODC). These assessments will be further discussed in the “Postoperative  
7 data” section.  
8

9 The preoperative data collection form (DCF) can be seen in Supplementary file 3.  
10

### 11 12 **Intraoperative data**

13  
14 Data regarding the surgery will be collected. Intraoperative data includes type of arthroplasty  
15 performed (TKA or THA), type of anaesthesia (spinal, general or other anaesthesia), use of  
16 femoral nerve block, intraoperative drug use, tourniquet time, intra-articular injections and  
17 blood transfusion (number of pints transfused). Occurrence of hypotension, which is defined  
18 as a mean arterial pressure <60mmHg, and its duration will also be recorded.  
19  
20

### 21 22 **Postoperative data**

#### 23 Primary outcome

24  
25 The primary outcome will be the presence of postoperative delirium following TJA. Each  
26 patient will be assessed for delirium on postoperative day (POD) 1, 2 and 3 in the wards at  
27 7am as well as the day of discharge. Delirium will not be evaluated on POD 0 due to  
28 difficulty in differentiating delirium from the effects of residual anaesthesia.  
29  
30

31 CAM will be used to detect postoperative delirium and delirium severity. Delirium is said to  
32 be present if the patient meets the CAM criteria for any of the postoperative assessments.  
33 Patients assessed to have delirium will be referred to the psychiatrists for a formal diagnosis  
34 based on the DSM-V criteria and for further management.  
35

#### 36 Short-term secondary outcomes

37  
38 Postoperative complications will be assessed by the Postoperative Morbidity Survey (POMS).  
39 This is a 9-point survey that can be easily used by clinicians to characterise short-term  
40 postoperative morbidity in their respective settings<sup>26</sup>. It is designed to only identify morbidity  
41 of a type and severity that could prolong length of stay (LOS). Using POMS, postoperative  
42 morbidity outcomes can be dichotomised into 2 categories – the absence and presence of  
43 morbidity. The POMS instrument can be seen in Supplementary file 4 attached. POMS will  
44 be assessed on POD 3, 5, 8 and 15, as recommended by the original literature<sup>26</sup>. It has also  
45 been reported to have good inter-rater reliability and acceptability to patients<sup>27</sup>.  
46  
47

48 In addition, the Comprehensive Complication Index (CoCI) will also be used to assess  
49 postoperative complications, which is based on the widely established Clavien-Dindo  
50 classification. The score is the sum of all complications attributable to a single procedure,  
51 weighted according to their respective severities. The index thus integrates the severity of all  
52 major and minor postoperative complications in a patient, minimising the risk of ignoring  
53 minor complications. The score ranges from 0 (no complications) to 100 (death)<sup>28</sup>. The CoCI  
54 will be assessed on the day of discharge and POD 30. It is more sensitive than other existing  
55 traditional endpoints to detect treatment effects on postoperative morbidity<sup>28</sup>.  
56  
57

1  
2  
3 Other postoperative outcomes that will be obtained include postoperative nausea and  
4 vomiting (PONV), LOS and 30-day readmission rates. 30-day readmission is defined as  
5 readmission within 30 days of initial admission. The reason for readmission will also be  
6 obtained.  
7

### 8 Long-term secondary outcomes

9  
10 Longer-term outcomes such as functional and health-related quality-of-life (HRQoL)  
11 outcomes will also be recorded by the ODC total joint registry at 6 months, 1 year, 2 years  
12 and 5 years postoperatively. The ODC tracks clinical outcome measures during pre- and  
13 postoperative functional assessments of the patients in SGH. Their total joint registry  
14 contains data about outcomes from knee and hip arthroplasties.  
15

16 For patients undergoing TKA, knee function will be measured using the new Knee Society  
17 Knee Score (KSKS) and Function Score (KSFS)<sup>29</sup>. The physician-derived KSKS measures  
18 alignment, stability, joint motion and symptoms experienced. The patient-derived KSFS  
19 evaluates use of walking aids and supports, ability to complete standard activities of daily  
20 living and discretionary activities. The KSKS and KSFS each range from 0 (worst) to 100  
21 (best). Both provide a validated rating of the functional outcome of the patient and knee  
22 prosthesis after TKA<sup>30</sup>. In addition, the Oxford Knee Score (OKS)<sup>31</sup> will also be used, which  
23 is a 12-item, patient-assessed questionnaire designed specifically for use in patients  
24 undergoing TKA [7]. It assesses an individual's pain and physical disability. Each item is  
25 scored from 1 (least difficulty/severity) to 5 (most difficulty/severity), and individual item  
26 scores are summed to yield an overall score ranging from 12 (no pain or limitation) to 60  
27 (severe pain or limitation). A lower OKS indicates a better outcome. It has good reliability,  
28 construct and content validity, and sensitivity to clinically important changes over time<sup>31,32</sup>. It  
29 correlates strongly with pain but less with postoperative functioning<sup>33</sup>.  
30  
31

32 For patients undergoing THA, hip function will be measured using the Harris Hip Score  
33 (HHS)<sup>34</sup>. The HHS is a clinician-based tool to assess the outcomes of hip surgery such as  
34 THA. It contains 4 subscales – pain severity, function, absence of deformity and range of  
35 motion. The total score ranges from 0 (worst) and 100 (best). It showed high validity and  
36 reliability when used to study the clinical outcome of THA<sup>35</sup>. Hip function will also be  
37 measured using the Parker Mobility Score (PMS)<sup>36</sup>. A score of 1 represents a patient who  
38 does not require a walking aid and has no restriction in walking distance, while a score of 10  
39 represents a patient who is mostly bedbound. It is reliable and a valid predictor of in-hospital  
40 and long-term outcomes<sup>36-38</sup>. Outcomes for THA will only be recorded at 6 months and 2  
41 years, unlike the other long-term secondary outcomes.  
42  
43

44 HRQoL will be assessed based on the 36-Item Short Form Health Survey (SF-36)<sup>39</sup> to obtain  
45 a baseline score. It consists of 36 questions categorised into 8 domains (physical functioning,  
46 bodily pain, role limitations due to physical health problems, role limitations due to personal  
47 or emotional problems, emotional well-being, social functioning, energy/fatigue, and general  
48 health perceptions). This instrument is shown in Supplementary file 5. Higher scores indicate  
49 better health status and quality of life.  
50  
51

52 Days alive and out of hospital (DAOH) will also be determined for each patient at 1 month, 6  
53 months and 12 months to assess overall impact of postoperative delirium on morbidity and  
54 mortality. DAOH will be calculated based on death date (if present) and duration of all  
55 subsequent hospitalisations until the follow-up date. This will be recorded as a percentage  
56  
57  
58  
59

1  
2  
3 by dividing DAOH by total potential follow-up period, which is the time period between the  
4 operation and the respective dates of follow-up (1 month, 6 months and 12  
5 months). %DAOH is a useful measure as it emphasises the deaths occurring early in follow-  
6 up and takes into account the severity (duration) of any hospitalisation.<sup>40</sup>  
7

### 8 Postoperative risk factors

9 Other postoperative data will be collected as variables for risk factors.

10  
11 Postoperative pain at rest will be evaluated using the pain Visual Analog Scale (VAS) during  
12 the same visit as CAM on POD 1, 2 and 3. Each patient will score pain experienced at rest  
13 on a scale, with 0 = no pain and 10 = maximum pain.  
14

15 Sensory impairment will also be assessed during the postoperative interviews similar to the  
16 preoperative assessments.  
17

18 The postoperative DCF can be seen in Supplementary file 6.

19  
20 The flowchart shown in Figure 2 depicts a patient's journey starting from enrolment in the  
21 PEC.  
22  
23  
24

### 25 **Data management**

26 Patient data will be kept confidential throughout the study. All electronic study data entry,  
27 storage and analysis will be done according to institutional data security policy, using  
28 password protected data in secure systems.  
29

30  
31 The patient data collected will be de-identified and the key kept securely separated with  
32 access limited to principal investigator and co-investigators. A study-related identification  
33 number given to each patient will be used on the case report form. Research members will  
34 enter the de-identified data into the REDCap™ (Research Electronic Data Capture) tool  
35 hosted on a secure server at Singapore General Hospital<sup>36</sup>. The hardcopy of the research  
36 data will be securely stored within the department. The softcopy of research data will be  
37 saved in a password-protected file and will be stored in institution approved login-protected  
38 system and encrypted hard-drive. Only study members will have access to the data.  
39  
40  
41

### 42 **Power and sample size calculations**

43  
44 The primary aim of the study is to characterise the incidence of postoperative delirium  
45 following TJA, which is estimated at around 10% based on existing literature<sup>2</sup>. Using this  
46 estimate, 150 patients are enough to detect the incidence with a precision of 5% and  
47 confidence level of 95%.  
48

49 However, this study will also aim to detect potential factors which may be correlated to  
50 postoperative delirium by logistic regression. Thus, we will target to recruit 500 patients such  
51 that we are able to investigate the risk factors and associated outcomes of postoperative  
52 delirium using multiple logistic models while minimising the limitation of a small number of  
53 events of postoperative delirium.  
54  
55  
56  
57  
58  
59  
60

### Statistical analyses

The incidence of postoperative delirium following TJA using the standard formula – the number of patients diagnosed to have postoperative delirium divided by the total number of patients in the study, and the result expressed as a percentage.

Potential risk factors of postoperative delirium will also be identified by comparing the perioperative data recorded between the patients with and without postoperative delirium. Data will first be summarised using descriptive statistics including mean, standard deviation (SD), median, range and frequency tables. Univariate analyses will then be used identify the differences between the two groups. Data of continuous variables will be compared using the Student's t-test (normally distributed data) or the Wilcoxon rank sum test (not normally distributed data). Data of categorical variables will be compared by Pearson Chi-square test or Fisher's exact test.

The variables which are statistically significant or close to significant (p value <0.05 or <0.1) between the two groups of patients will then be selected for inclusion in a multivariate logistic regression model. This will determine the independent predictors of postoperative delirium. The final model will be determined by sensitivity analysis. The sensitivity analysis can help us to understand the contribution of each parameter to the model outputs, investigate which parameter will have the biggest influence and then refine the model to obtain the final model which is statistically and clinically meaningful. Odds ratio (OR) will be used to describe the correlation of them with postoperative delirium.

Postoperative outcomes which are associated with the incidence of postoperative delirium will also be examined by comparing patients with and without postoperative delirium. The postoperative POMS score, CoCI score, incidence of PONV, LOS, incidence of 30-day readmission and %DAOH will be similarly compared using Student's t-test and Pearson Chi-square tests as appropriate.

For the long-term postoperative outcomes, the median postoperative SF-36 for each domain, KSKS, KSFS, OKS, HHS and PMS scores applicable at 6 months, 1 year, 2 years and 5 years will be compared to the median preoperative baseline scores using the Wilcoxon matched pairs sign rank test. The tests with a change greater than the minimally clinically important difference (MCID) will be identified. The MCID values for each test will be obtained from the pre-existing literature. These variables will then be analysed by analysis of covariance (ANCOVA) to identify predictors of the long-term postoperative test scores. All predictor variables will be incorporated into the multivariate ANCOVA model. Analyses will be performed separately for the various tests that demonstrated changes greater than MCID.

## ETHICS AND DISSEMINATION

This study has been approved by the Singapore General Hospital Institutional Review Board (SGH IRB) (CIRB Ref: 2017/2467) and is registered on the ClinicalTrials.gov registry (Identified: NCT03260218). In the event of any important protocol modifications, all investigators, SGH IRB and trial participants will be notified.

The results of this study will be presented at international conferences and submitted to a peer-reviewed journal. The data collected will also be made available in a public data repository.

All eligible participants will be approached by the research assistant during their visit to the preoperative evaluation clinic. They will be given an explanation about the study, a patient information sheet and a consent form. They will then be given an ample time to consider if they would like to participate in the study. They will also be allowed to ask questions freely. If the participant expresses an interest to participate in the study, a written consent will be obtained. The consent forms are in English. However, participants from non-English speaking backgrounds will be provided a translator. For illiterate participants, an accompanying family member will be approached to verify and witness the consent process.

## REFERENCES

1. American Psychiatric Association: Diagnostic and Statistical Manual of Mental Disorders, Fifth Edition. Arlington, VA, American Psychiatric Association, 2013.
2. Scott JE, Mathias JL, Kneebone AC. Incidence of delirium following total joint replacement in older adults: A meta-analysis. *Gen Hosp Psychiatry* 2015;37(3):223-229.doi:10.1016/j.genhosppsych.2015.02.004.
3. Rudolph JL, Marcantonio ER. Postoperative Delirium: Acute Change with Long-Term Implications. *Anesth Analg* 2011;112(5):1202-1211.doi:10.1038/jid.2014.371.
4. Rudolph JL, Jones RN, Rasmussen LS, et al. Independent Vascular and Cognitive Risk Factors for Postoperative Delirium. *Am J Med* 2007;120(9):807-813.doi:10.1016/j.amjmed.2007.02.026.
5. Marcantonio ER, Goldman L, Mangione CM, et al. A clinical prediction rule for delirium after elective noncardiac surgery. *JAMA* 1994;271(2):134-139.doi:10.1001/jama.1994.03510260066030.
6. Witlox J, Eurelings LSM, de Jonghe JFM, et al. Delirium in Elderly Patients and the Risk of Postdischarge Mortality, Institutionalization, and Dementia. *JAMA* 2010;304(4):443.doi:10.1001/jama.2010.1013.
7. Lovald ST, Ong KL, Malkani AL, et al. Complications, Mortality, and Costs for Outpatient and Short-Stay Total Knee Arthroplasty Patients in Comparison to Standard-Stay Patients. *J Arthroplasty* 2014;29(3):510-515.doi:10.1016/j.arth.2013.07.020.
8. Kurtz S, Ong K, Lau E, et al. Projections of Primary and Revision Hip and Knee Arthroplasty in the United States from 2005 to 2030. *J Bone Jt Surg* 2007;89(4):780.doi:10.2106/JBJS.F.00222.
9. Raats JW, van Eijnsden WA, Crolla RMPH, et al. Risk Factors and Outcomes for Postoperative Delirium after Major Surgery in Elderly Patients. *PLoS One* 2015;10(8):e0136071.doi:10.1371/journal.pone.0136071.
10. Elie M, Cole MG, Primeau FJ, et al. Delirium risk factors in elderly hospitalized patients. *J Gen Intern Med* 1998;13(3):204-212.doi:10.1046/j.1525-1497.1998.00047.x.
11. Quick Facts – Singapore General Hospital. <https://www.sgh.com.sg/about-us/more-about-sgh/pages/quickfacts.aspx> (Accessed July 14, 2017).
12. Adult Reconstructive Service – Singapore General Hospital. <https://www.sgh.com.sg/departments/ortho/services/pages/adult-reconstructive-service.aspx>. Published 2014 (Accessed July 14, 2017).
13. Inouye SK, van Dyck CH, Alessi CA, et al. Clarifying Confusion: The Confusion Assessment Method. *Ann Intern Med* 1990;113(12):941.doi:10.7326/0003-4819-113-12-941.
14. Folstein MF, Folstein SE, McHugh PR. "Mini-mental state". A practical method for grading the cognitive state of patients for the clinician. *J Psychiatr Res* 1975;12(3):189-198.doi:10.1016/0022-3956(75)90026-6.



15. Katzman R, Zhang MY, Ouang-Ya-Qu, et al. A Chinese version of the Mini-Mental State Examination; impact of illiteracy in a Shanghai dementia survey. *J Clin Epidemiol* 1988;41(10):971-978.doi:10.1016/0895-4356(88)90034-0.
16. Sahadevan S, Lim PP, Tan NJ, et al. Diagnostic performance of two mental status tests in the older chinese: influence of education and age on cut-off values. *Int J Geriatr Psychiatry* 2000;15(3):234-241.doi:10.1002/(SICI)1099-1166(200003)15:33.O.CO;2-G.
17. Ng T-P, Niti M, Chiam P-C, et al. Ethnic and Educational Differences in Cognitive Test Performance on Mini-Mental State Examination in Asians. *Am J Geriatr Psychiatry* 2007;15(2):130-139.doi:10.1097/01.JGP.0000235710.17450.9a.
18. Confusion Assessment Method. © 1988, 2003, Hospital Elder Life Program. All rights reserved. Adapted from: Inouye SK et al. *Ann Intern Med.* 1990; 113:941-8.
19. Pye A, Charalambous AP, Leroi I, et al. Screening tools for the identification of dementia for adults with age-related acquired hearing or vision impairment: a scoping review. *Int Psychogeriatrics* 2017:1-14.doi:10.1017/S104161021700120X.
20. Mathiowetz V, Weber K, Volland G, et al. Reliability and validity of grip and pinch strength evaluations. *J Hand Surg Am* 1984;9(2):222-226.doi:10.1016/S0363-5023(84)80146-X.
21. Ong HL, Abdin E, Chua BY, et al. Hand-grip strength among older adults in Singapore: a comparison with international norms and associative factors. *BMC Geriatr* 2017;17(1):176.doi:10.1186/s12877-017-0565-6.
22. Daabiss M. American Society of Anaesthesiologists physical status classification. *Indian J Anaesth* 2011;55(2):111-115.doi:10.4103/0019-5049.79879.
23. Charlson ME, Pompei P, Ales KL, et al. A new method of classifying prognostic comorbidity in longitudinal studies: development and validation. *J Chronic Dis* 1987;40(5):373-383.doi:10.1016/0021-9681(87)90171-8.
24. Charlson ME, Szatrowski TP, Peterson J, et al. Validation of a combined comorbidity index. *J Clin Epidemiol* 1994;47(11):1245-1251.doi:10.1016/0895-4356(94)90129-5.
25. Prasad KT, Sehgal IS, Agarwal R, et al. Assessing the likelihood of obstructive sleep apnea: a comparison of nine screening questionnaires. *Sleep Breath* 2017:1-9.doi:10.1007/s11325-017-1495-4.
26. Bennett-Guerrero E, Welsby I, Dunn TJ, et al. The use of a postoperative morbidity survey to evaluate patients with prolonged hospitalization after routine, moderate-risk, elective surgery. *Anesth Analg* 1999;89(2):514-519.doi:10.1213/00000539-199908000-00050.
27. Grocott MPW, Browne JP, Van der Meulen J, et al. The Postoperative Morbidity Survey was validated and used to describe morbidity after major surgery. *J Clin Epidemiol* 2007;60(9):919-928.doi:10.1016/j.jclinepi.2006.12.003.
28. Slankamenac K, Graf R, Barkun J, et al. The Comprehensive Complication Index. *Ann Surg* 2013;258(1):1-7.doi:10.1097/SLA.0b013e318296c732.
29. Insall JN, Dorr LD, Scott RD, et al. Rationale of the Knee Society clinical rating system. *Clin Orthop Relat Res* 1989;(248):13-14.doi:10.1007/978-1-4471-5451-8\_48.

- 1
- 2
- 3 30. Scuderi GR, Bourne RB, Noble PC, et al. The new Knee Society Knee Scoring System. *Clin Orthop Relat Res* 2012;470(1):3-19.doi:10.1007/s11999-011-2135-0.
- 4
- 5 31. Dawson J, Fitzpatrick R, Murray D, et al. Questionnaire on the perceptions of patients
- 6 about total knee replacement. *J Bone Joint Surg Br* 1998;80(1):63-
- 7 69.<http://bjj.boneandjoint.org.uk/content/80-B/1/63> (Accessed July 14, 2017).
- 8
- 9 32. Garratt AM, Brealey S, Gillespie WJ. Patient-assessed health instruments for the knee:
- 10 a structured review. *Rheumatology* 2004;43(11):1414-
- 11 1423.doi:10.1093/rheumatology/keh362.
- 12
- 13 33. van Hove RP, Brohet RM, van Royen BJ, et al. High correlation of the Oxford Knee
- 14 Score with postoperative pain, but not with performance-based functioning. *Knee*
- 15 *Surgery, Sport Traumatol Arthrosc* 2016;24(10):3369-3375.doi:10.1007/s00167-015-
- 16 3585-9.
- 17
- 18 34. Harris WH. Traumatic arthritis of the hip after dislocation and acetabular fractures:
- 19 treatment by mold arthroplasty. An end-result study using a new method of result
- 20 evaluation. *J Bone Joint Surg Am* 1969;51(4):737-755.doi:10.1007/978-1-4471-5451-
- 21 8\_3.
- 22
- 23 35. Söderman P, Malchau H. Is the Harris hip score system useful to study the outcome of
- 24 total hip replacement? *Clin Orthop Relat Res* 2001;(384):189-
- 25 197.doi:10.1097/00003086-200103000-00022.
- 26
- 27 36. Parker MJ, Palmer CR. A new mobility score for predicting mortality after hip fracture.
- 28 *J Bone Joint Surg Br* 1993;75(5):797-798.[http://bjj.boneandjoint.org.uk/content/75-](http://bjj.boneandjoint.org.uk/content/75-B/5/797)
- 29 [B/5/797](http://bjj.boneandjoint.org.uk/content/75-B/5/797) (Accessed December 16, 2017).
- 30
- 31 37. Kristensen M, Bandholm T, Foss N, et al. High inter-tester reliability of the new mobility
- 32 score in patients with hip fracture. *J Rehabil Med* 2008;40(7):589-
- 33 591.doi:10.2340/16501977-0217.
- 34
- 35 38. Kristensen MT, Foss NB, Ekdahl C, et al. Prefracture functional level evaluated by the
- 36 New Mobility Score predicts in-hospital outcome after hip fracture surgery. *Acta Orthop*
- 37 2010;81(3):296-302.doi:10.3109/17453674.2010.487240.
- 38
- 39 39. Ware JE, Sherbourne CD. The MOS 36-item short-form health survey (SF-36). I.
- 40 Conceptual framework and item selection. *Med Care* 1992;30(6):473-
- 41 483.[www.jstor.org/stable/3765916](http://www.jstor.org/stable/3765916) (Accessed July 13, 2017).
- 42
- 43 40. Ariti CA, Cleland JGF, Pocock SJ, et al. Days alive and out of hospital and the patient
- 44 journey in patients with heart failure: Insights from the Candesartan in Heart failure:
- 45 Assessment of Reduction in Mortality and morbidity (CHARM) program. *Am Heart J*
- 46 2011;162(5):900-906.doi:10.1016/j.ahj.2011.08.003.
- 47
- 48
- 49
- 50
- 51
- 52
- 53
- 54
- 55
- 56
- 57
- 58
- 59



**FUNDING STATEMENT**

This work was supported by the Singhealth Duke-NUS Academic Medical Centre Nurturing Clinician Scientists Scheme Award, project number 12/FY2017/P1/15-A29. This funding source, Singhealth Duke-NUS Academic Medical Centre, has no role in the design of this study and will not have a role in the analysis and interpretation of the results.

**COMPETING INTEREST STATEMENT**

None.

For peer review only

1  
2  
3  
4  
5  
6  
7  
8  
9  
10  
11  
12  
13  
14  
15  
16  
17  
18  
19  
20  
21  
22  
23  
24  
25  
26  
27  
28  
29  
30  
31  
32  
33  
34  
35  
36  
37  
38  
39  
40  
41  
42  
43  
44  
45  
46  
47  
48  
49  
50  
51  
52  
53  
54  
55  
56  
57  
58  
59  
60

**FIGURE LEGENDS**

**Figure 1.** CAM criteria: at least one criteria on each of the 3 rows must be met for a positive result.

**Figure 2.** Flowchart depicting a patient’s timeline during the study.

For peer review only

1  
2  
3  
4  
5  
6  
7  
8  
9  
10  
11  
12  
13  
14  
15  
16  
17  
18  
19  
20  
21  
22  
23  
24  
25  
26  
27  
28  
29  
30  
31  
32  
33  
34  
35  
36  
37  
38  
39  
40  
41  
42  
43  
44  
45  
46  
47  
48  
49  
50  
51  
52  
53  
54  
55  
56  
57  
58  
59  
60

1a. **Acute onset:** Is there evidence of an acute change in mental status from the patient's baseline?  
**OR**  
1b. **Fluctuating course:** Did the (abnormal) behavior fluctuate during the day, that is tend to come and go or increase and decrease in severity?

AND

2. **Inattention:** Did the patient have difficulty focusing attention, for example being easily distractible, or having difficulty keeping track of what was being said?

AND

3. **Disorganised thinking:** Was the patient's thinking disorganized or incoherent, such as rambling or irrelevant conversation, unclear or illogical flow of ideas, or unpredictable switching from subject to subject?

OR

4. **Altered level of consciousness:** Overall, how would you rate this patient's level of consciousness? Any answer other than 'alert' indicates an abnormal level of consciousness.

CAM criteria: at least one criteria on each of the 3 rows must be met for a positive result

240x129mm (300 x 300 DPI)

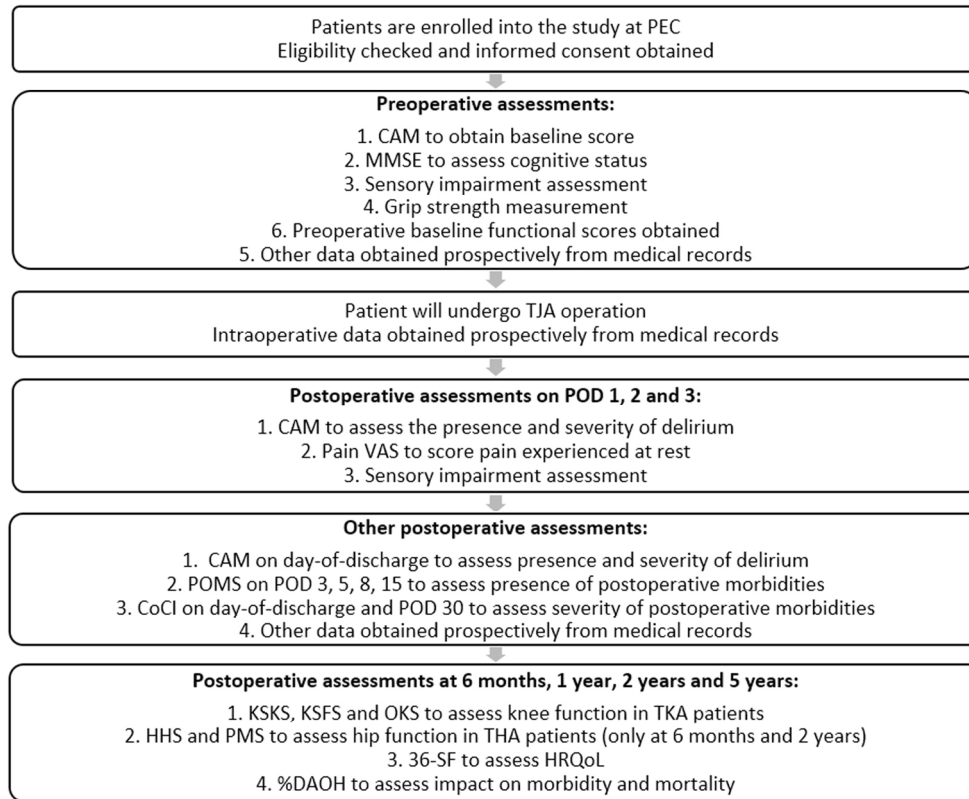

34 Flowchart depicting a patient's timeline during the study

35 140x117mm (300 x 300 DPI)

36  
37  
38  
39  
40  
41  
42  
43  
44  
45  
46  
47  
48  
49  
50  
51  
52  
53  
54  
55  
56  
57  
58  
59  
60

only

| Item no. | Original version            | Adapted version                                              | Reasons                                                                      |
|----------|-----------------------------|--------------------------------------------------------------|------------------------------------------------------------------------------|
| 1        | "What is the season?"       | Without looking at your watch, what time is it?"             | There are no seasons in Singapore.                                           |
| 2a       | "What county are we in?";   | "What area/street are we in?";                               | Singapore is a city country; "Singapore" would only the only correct answer. |
| 2b       | "What town/city are we in?" | "Which part of Singapore (North/South/East/West) are we in?" | Singapore is a city country; "Singapore" would only the only correct answer. |

| Item no. | English version                                | Chinese version      | Malay version                                    |
|----------|------------------------------------------------|----------------------|--------------------------------------------------|
| 4        | Spell the word "WORLD" backwards               | 请把这句话倒说一遍 – “天上有月亮“  | Terbalikkan ejaan "DUNIA"                        |
| 7        | Repeat the following – "no ifs, ands, or buts" | 请清除的重复一遍 – “四十四只石狮子“ | Ulangan perkataan – "dahulu, kini dan selamanya" |

For peer review only

## Preoperative DCF

| Postoperative Delirium Following Total Joint Arthroplasties among South East Asians                                                                                                                                                                                                                                                                                                                                                                                                                                                                                                                                                                                                                                                          |                                                                                                                                                                                                                                                                                                                                                                                                                                                                                                                                                                                                                                                                                                                                                                                                                                                                                                                                                                                                                                                   |
|----------------------------------------------------------------------------------------------------------------------------------------------------------------------------------------------------------------------------------------------------------------------------------------------------------------------------------------------------------------------------------------------------------------------------------------------------------------------------------------------------------------------------------------------------------------------------------------------------------------------------------------------------------------------------------------------------------------------------------------------|---------------------------------------------------------------------------------------------------------------------------------------------------------------------------------------------------------------------------------------------------------------------------------------------------------------------------------------------------------------------------------------------------------------------------------------------------------------------------------------------------------------------------------------------------------------------------------------------------------------------------------------------------------------------------------------------------------------------------------------------------------------------------------------------------------------------------------------------------------------------------------------------------------------------------------------------------------------------------------------------------------------------------------------------------|
| Serial No: _____<br>Date of preoperative assessment:<br>_____                                                                                                                                                                                                                                                                                                                                                                                                                                                                                                                                                                                                                                                                                |                                                                                                                                                                                                                                                                                                                                                                                                                                                                                                                                                                                                                                                                                                                                                                                                                                                                                                                                                                                                                                                   |
| <b>DEMOGRAPHIC</b><br>Age: _____<br>Gender: Male <input type="checkbox"/> Female <input type="checkbox"/><br>Race: Chinese <input type="checkbox"/> Malay <input type="checkbox"/> Indian <input type="checkbox"/> Others <input type="checkbox"/><br>Language:<br>English <input type="checkbox"/> Mandarin <input type="checkbox"/> Malay <input type="checkbox"/><br>Others _____<br>Highest education completed:<br>_____<br>Height: _____ m<br>Weight: _____ kg<br>BMI: _____                                                                                                                                                                                                                                                           |                                                                                                                                                                                                                                                                                                                                                                                                                                                                                                                                                                                                                                                                                                                                                                                                                                                                                                                                                                                                                                                   |
| <b>OP DETAILS</b><br>Surgeon: _____<br>Type of Operation:<br>TKR <input type="checkbox"/> THR <input type="checkbox"/><br>Unilateral L <input type="checkbox"/> / R <input type="checkbox"/> OR Bilateral <input type="checkbox"/><br>Primary <input type="checkbox"/> Revision <input type="checkbox"/><br>Pre-operative Dx:<br>_____<br>_____<br>_____<br>Grip Strength: _____                                                                                                                                                                                                                                                                                                                                                             |                                                                                                                                                                                                                                                                                                                                                                                                                                                                                                                                                                                                                                                                                                                                                                                                                                                                                                                                                                                                                                                   |
| <b>BACKGROUND MEDICAL CONDITION</b><br>ASA: _____<br>Charlson Comorbidity Index<br>Overall score: _____                                                                                                                                                                                                                                                                                                                                                                                                                                                                                                                                                                                                                                      |                                                                                                                                                                                                                                                                                                                                                                                                                                                                                                                                                                                                                                                                                                                                                                                                                                                                                                                                                                                                                                                   |
| <b>CVS</b><br><input type="checkbox"/> Myocardial infarction<br><input type="checkbox"/> Congestive heart failure<br><input type="checkbox"/> Peripheral vascular disease<br><b>CNS</b><br><input type="checkbox"/> Cerebrovascular disease<br><input type="checkbox"/> Hemiplegia or paraplegia<br><input type="checkbox"/> Dementia<br><b>Respi</b><br><input type="checkbox"/> Chronic pulmonary disease<br><b>MSK</b><br><input type="checkbox"/> Rheumatologic disease<br><b>GI</b><br><input type="checkbox"/> Peptic ulcer disease<br><input type="checkbox"/> Mild liver disease<br><input type="checkbox"/> Moderate or severe liver disease<br><b>Endocrine</b><br><input type="checkbox"/> Diabetes without chronic complications | Smoking <input type="checkbox"/><br>Alcoholism <input type="checkbox"/><br>Diabetes:<br>OHGA <input type="checkbox"/> Insulin <input type="checkbox"/><br>Latest HbA1c _____<br>Chronic kidney disease <input type="checkbox"/><br>Pre-existing dementia <input type="checkbox"/><br>Other pre-existing neurological problems<br><input type="checkbox"/> CVA<br><input type="checkbox"/> Parkinson Disease<br><input type="checkbox"/> Depression<br><input type="checkbox"/> Anxiety<br><input type="checkbox"/> Schizophrenia and other delusional disorders<br>Visual impairment <input type="checkbox"/><br>Hearing impairment <input type="checkbox"/><br>STOPBANG score _____<br><b>Chronic Medications</b><br>Benzodiazepine <input type="checkbox"/><br>Statin <input type="checkbox"/><br>Tramadol <input type="checkbox"/> Oxynorm <input type="checkbox"/><br>Anti-depressants<br>Tricyclics <input type="checkbox"/> SSRI <input type="checkbox"/> SNRI <input type="checkbox"/><br>MOAI <input type="checkbox"/><br>Anti-psychotics |

|                                                                                                                                                                                                |                                                 |                                        |                                     |
|------------------------------------------------------------------------------------------------------------------------------------------------------------------------------------------------|-------------------------------------------------|----------------------------------------|-------------------------------------|
| <input type="checkbox"/>                                                                                                                                                                       | Diabetes with chronic complications             | Haloperidol <input type="checkbox"/>   | Quetiapine <input type="checkbox"/> |
| <b>Renal</b>                                                                                                                                                                                   |                                                 | Olanzapine <input type="checkbox"/>    | Clozapine <input type="checkbox"/>  |
| <input type="checkbox"/>                                                                                                                                                                       | Mild Renal disease                              | <b>Preoperative Laboratory Results</b> |                                     |
| <input type="checkbox"/>                                                                                                                                                                       | Moderate or severe renal disease                | Hemoglobin _____                       |                                     |
| <b>Malignancy</b>                                                                                                                                                                              |                                                 | MCV _____                              |                                     |
| <input type="checkbox"/>                                                                                                                                                                       | Any malignancy, including leukemia and lymphoma | RDW _____                              |                                     |
| <input type="checkbox"/>                                                                                                                                                                       | Non-metastatic solid tumour                     | MCV _____                              |                                     |
| <input type="checkbox"/>                                                                                                                                                                       | Metastatic solid tumor                          | MCHC _____                             |                                     |
| <b>Immunological</b>                                                                                                                                                                           |                                                 | Urea _____                             |                                     |
| <input type="checkbox"/>                                                                                                                                                                       | AIDS/HIV                                        |                                        |                                     |
| <b>IntraOp</b>                                                                                                                                                                                 |                                                 |                                        |                                     |
| ANA Type: _____                                                                                                                                                                                |                                                 |                                        |                                     |
|                                                                                                                                                                                                |                                                 | <b>Yes</b>                             | <b>No</b>                           |
| Fem N block                                                                                                                                                                                    | <input type="checkbox"/>                        | <input type="checkbox"/>               |                                     |
| Benzo Use:                                                                                                                                                                                     | <input type="checkbox"/>                        | <input type="checkbox"/>               |                                     |
| Atropine Use:                                                                                                                                                                                  | <input type="checkbox"/>                        | <input type="checkbox"/>               |                                     |
| Opioid use                                                                                                                                                                                     | <input type="checkbox"/>                        | <input checked="" type="checkbox"/>    |                                     |
| <b>If yes , dose: _____</b>                                                                                                                                                                    |                                                 |                                        |                                     |
| Dexa use                                                                                                                                                                                       | <input type="checkbox"/>                        | <input type="checkbox"/>               |                                     |
| <b>If yes , dose: _____</b>                                                                                                                                                                    |                                                 |                                        |                                     |
| Promethazine use:                                                                                                                                                                              | <input type="checkbox"/>                        | <input type="checkbox"/>               |                                     |
| Ondansetron:                                                                                                                                                                                   | <input type="checkbox"/>                        | <input type="checkbox"/>               |                                     |
| Blood Transfusion                                                                                                                                                                              | <input type="checkbox"/>                        | <input type="checkbox"/>               |                                     |
| Hypotension                                                                                                                                                                                    | <input type="checkbox"/>                        | <input type="checkbox"/>               |                                     |
| <b>If yes, duration: _____</b>                                                                                                                                                                 |                                                 |                                        |                                     |
| <b>BASELINE CAM</b>                                                                                                                                                                            |                                                 |                                        |                                     |
| 1. Acute onset change in mental status from baseline?                                                                                                                                          |                                                 |                                        |                                     |
| a. Yes <input type="checkbox"/>                                                                                                                                                                |                                                 |                                        |                                     |
| b. No <input type="checkbox"/>                                                                                                                                                                 |                                                 |                                        |                                     |
| c. Uncertain _____                                                                                                                                                                             |                                                 |                                        |                                     |
| 2. Does the patient have difficulty focusing attention, is easily distracted, or has difficulty keeping track of what was being said?                                                          |                                                 |                                        |                                     |
| a. Yes – mild form <input type="checkbox"/> , fluctuating <input type="checkbox"/>                                                                                                             |                                                 |                                        |                                     |
| b. Yes – marked form <input type="checkbox"/> , fluctuating <input type="checkbox"/>                                                                                                           |                                                 |                                        |                                     |
| c. Uncertain _____                                                                                                                                                                             |                                                 |                                        |                                     |
| d. No <input type="checkbox"/>                                                                                                                                                                 |                                                 |                                        |                                     |
| 3. Was the patient's thinking disorganized or incoherent, such as rambling or irrelevant conversation, unclear or illogical flow of ideas, or unpredictable switching from subject to subject? |                                                 |                                        |                                     |
| a. Yes – mild form <input type="checkbox"/> , fluctuating <input type="checkbox"/>                                                                                                             |                                                 |                                        |                                     |



- b. Yes – marked form , fluctuating
  - c. Uncertain \_\_\_\_\_
  - d. No
4. How is the patient’s overall level of consciousness?
- a. Alert (normal)
  - b. Vigilant (hyperalert, overly sensitive to environmental stimuli, startled easily) , fluctuating
  - c. Lethargic (Drowsy, easily aroused) , fluctuating
  - d. Stupor (Difficult to arouse) , fluctuating
  - e. Coma (Unarousable) , fluctuating
  - f. Uncertain \_\_\_\_\_

**BASELINE MINI MENTAL STATE EXAMINATION**

Total score \_\_\_\_\_

Level of consciousness

Alert  Drowsy  Stupor  Coma

|                        | Question                                                                                                                                                                                                                                                        | Score                           |
|------------------------|-----------------------------------------------------------------------------------------------------------------------------------------------------------------------------------------------------------------------------------------------------------------|---------------------------------|
| 1                      | What is the <ul style="list-style-type: none"> <li>• year</li> <li>• month</li> <li>• day of the week</li> <li>• date</li> <li>• current time now (without looking at your watch)?</li> </ul>                                                                   | / 5                             |
| 2                      | What country are we in?<br>What area/street are we in?<br>Which part of Singapore is this place (North, south, east, west or central)<br>Which hospital are we in?<br>Which floor?                                                                              | / 5                             |
| 3                      | Show the objects: ball, flag, tree<br><br>Name 3 objects: 1 second to say each. Then ask the patient all 3 after you have said them. Give 1 point for each correct answer. Then repeat them until he/she learns all 3. Count trials and record.<br>Trials _____ | / 3                             |
| 4                      | Serial 7’s. 1 point for each correct answer. Stop after 5 answers.<br>Alternatively spell “world” backward.                                                                                                                                                     | / 5                             |
| 5                      | Ask for the 3 objects repeated above. Give 1 point for each correct answer.                                                                                                                                                                                     | / 3                             |
| 6                      | Name a pencil and watch.<br>Repeat the following “No ifs, ands, or buts”<br>Follow a 3-stage command:<br>“Take a paper in your hand, fold it in half, and put it on the floor.”<br>Read and obey the following:                                                 | / 2<br>/ 1<br>/ 3<br>/ 1<br>/ 1 |
| <b>CLOSE YOUR EYES</b> |                                                                                                                                                                                                                                                                 |                                 |

1  
2  
3  
4  
5  
6  
7  
8  
9  
10  
11  
12  
13  
14  
15  
16  
17  
18  
19  
20  
21  
22  
23  
24  
25  
26  
27  
28  
29  
30  
31  
32  
33  
34  
35  
36  
37  
38  
39  
40  
41  
42  
43  
44  
45  
46  
47  
48  
49  
50  
51  
52  
53  
54  
55  
56  
57  
58  
59  
60

|  |                                                                                                            |     |
|--|------------------------------------------------------------------------------------------------------------|-----|
|  | Write a sentence.                                                                                          | / 1 |
|  | Copy the design shown<br> | / 1 |

For peer review only

### Postoperative Morbidity Survey

| Morbidity type   | Criteria                                                                                                                                                                                                                                                                                                      | Source of data      |
|------------------|---------------------------------------------------------------------------------------------------------------------------------------------------------------------------------------------------------------------------------------------------------------------------------------------------------------|---------------------|
| Pulmonary        | Has the patient developed a new requirement for oxygen or respiratory support.                                                                                                                                                                                                                                | Patient observation |
|                  |                                                                                                                                                                                                                                                                                                               | Treatment chart     |
| Infectious       | Currently on antibiotics and/or has had a temperature of >38°C in the last 24 hr.                                                                                                                                                                                                                             | Treatment chart     |
|                  |                                                                                                                                                                                                                                                                                                               | Observation chart   |
| Renal            | Presence of oliguria <500 mL/24 hr; increased serum creatinine (>30% from preoperative level); urinary catheter in situ.                                                                                                                                                                                      | Fluid balance chart |
|                  |                                                                                                                                                                                                                                                                                                               | Biochemistry result |
|                  |                                                                                                                                                                                                                                                                                                               | Patient observation |
| Gastrointestinal | Unable to tolerate an enteral diet for any reason including nausea, vomiting, and abdominal distension (use of antiemetic).                                                                                                                                                                                   | Patient questioning |
|                  |                                                                                                                                                                                                                                                                                                               | Fluid balance chart |
|                  |                                                                                                                                                                                                                                                                                                               | Treatment chart     |
| Cardiovascular   | Diagnostic tests or therapy within the last 24 hr for any of the following: new myocardial infarction or ischemia, hypotension (requiring fluid therapy >200 mL/hr or pharmacological therapy), atrial or ventricular arrhythmias, cardiogenic pulmonary edema, thrombotic event (requiring anticoagulation). | Treatment chart     |
|                  |                                                                                                                                                                                                                                                                                                               | Note review         |
| Neurological     | New focal neurological deficit, confusion, delirium, or coma.                                                                                                                                                                                                                                                 | Note review         |
|                  |                                                                                                                                                                                                                                                                                                               | Patient questioning |
| Hematological    | Requirement for any of the following within the last 24 hr: packed erythrocytes, platelets, fresh-frozen plasma, or cryoprecipitate.                                                                                                                                                                          | Treatment chart     |
|                  |                                                                                                                                                                                                                                                                                                               | Fluid balance chart |
| Wound            | Wound dehiscence requiring surgical exploration or drainage of pus from the operation wound with or without isolation of organisms.                                                                                                                                                                           | Note review         |
|                  |                                                                                                                                                                                                                                                                                                               | Pathology result    |
| Pain             | New postoperative pain significant enough to require parenteral opioids or regional analgesia.                                                                                                                                                                                                                | Treatment chart     |
|                  |                                                                                                                                                                                                                                                                                                               | Patient questioning |

### 36-Item Short Form Health Survey

#### RAND 36-Item Health Survey 1.0 Questionnaire Items

Choose one option for each questionnaire item.

1. In general, would you say your health is:
  - 1 – Excellent
  - 2 - Very good
  - 3 – Good
  - 4 – Fair
  - 5 – Poor
  
2. **Compared to one year ago**, how would you rate your health in general now?
  - 1 - Much better now than one year ago
  - 2 - Somewhat better now than one year ago
  - 3 - About the same
  - 4 - Somewhat worse now than one year ago
  - 5 - Much worse now than one year ago

The following items are about activities you might do during a typical day. Does **your health now limit you** in these activities? If so, how much?

- |                                                                                                            | Yes,<br>limited a<br>lot | Yes,<br>limited a<br>little | No, not<br>limited at<br>all |
|------------------------------------------------------------------------------------------------------------|--------------------------|-----------------------------|------------------------------|
| 3. <b>Vigorous activities</b> , such as running, lifting heavy objects, participating in strenuous sports  | <input type="radio"/> 1  | <input type="radio"/> 2     | <input type="radio"/> 3      |
| 4. <b>Moderate activities</b> , such as moving a table, pushing a vacuum cleaner, bowling, or playing golf | <input type="radio"/> 1  | <input type="radio"/> 2     | <input type="radio"/> 3      |
| 5. Lifting or carrying groceries                                                                           | <input type="radio"/> 1  | <input type="radio"/> 2     | <input type="radio"/> 3      |
| 6. Climbing <b>several</b> flights of stairs                                                               | <input type="radio"/> 1  | <input type="radio"/> 2     | <input type="radio"/> 3      |
| 7. Climbing <b>one</b> flight of stairs                                                                    | <input type="radio"/> 1  | <input type="radio"/> 2     | <input type="radio"/> 3      |
| 8. Bending, kneeling, or stooping                                                                          | <input type="radio"/> 1  | <input type="radio"/> 2     | <input type="radio"/> 3      |
| 9. Walking <b>more than a mile</b>                                                                         | <input type="radio"/> 1  | <input type="radio"/> 2     | <input type="radio"/> 3      |
| 10. Walking <b>several blocks</b>                                                                          | <input type="radio"/> 1  | <input type="radio"/> 2     | <input type="radio"/> 3      |
| 11. Walking <b>one block</b>                                                                               | <input type="radio"/> 1  | <input type="radio"/> 2     | <input type="radio"/> 3      |
| 12. Bathing or dressing yourself                                                                           | <input type="radio"/> 1  | <input type="radio"/> 2     | <input type="radio"/> 3      |

1  
2  
3  
4  
5  
6  
7 During the **past 4 weeks**, have you had any of the following problems with your work or other  
8 regular daily activities **as a result of your physical health**?

- |    | Yes                     | No                      |
|----|-------------------------|-------------------------|
| 9  |                         |                         |
| 10 | <input type="radio"/> 1 | <input type="radio"/> 2 |
| 11 |                         |                         |
| 12 | <input type="radio"/> 1 | <input type="radio"/> 2 |
| 13 |                         |                         |
| 14 | <input type="radio"/> 1 | <input type="radio"/> 2 |
| 15 |                         |                         |
| 16 | <input type="radio"/> 1 | <input type="radio"/> 2 |
| 17 |                         |                         |
| 18 | <input type="radio"/> 1 | <input type="radio"/> 2 |
| 19 |                         |                         |

20  
21  
22  
23 During the **past 4 weeks**, have you had any of the following problems with your work or other  
24 regular daily activities **as a result of any emotional problems** (such as feeling depressed or  
25 anxious)?

- |    | Yes                     | No                      |
|----|-------------------------|-------------------------|
| 26 |                         |                         |
| 27 | <input type="radio"/> 1 | <input type="radio"/> 2 |
| 28 |                         |                         |
| 29 | <input type="radio"/> 1 | <input type="radio"/> 2 |
| 30 |                         |                         |
| 31 | <input type="radio"/> 1 | <input type="radio"/> 2 |
| 32 |                         |                         |
| 33 | <input type="radio"/> 1 | <input type="radio"/> 2 |
| 34 |                         |                         |

35 20. During the **past 4 weeks**, to what extent has your physical health or emotional problems  
36 interfered with your normal social activities with family, friends, neighbours, or groups?

- 37  1 - Not at all
- 38  2 - Slightly
- 39  3 - Moderately
- 40  4 - Quite a bit
- 41  5 - Extremely

42  
43  
44  
45 21. How much **bodily** pain have you had during the **past 4 weeks**?

- 46  1 - None
- 47  2 - Very mild
- 48  3 - Mild
- 49  4 - Moderate
- 50  5 - Severe
- 51  6 - Very severe

52  
53  
54  
55  
56 22. During the **past 4 weeks**, how much did **pain** interfere with your normal work (including  
57 both work outside the home and housework)?

- 58  1 - Not at all

- 2 - A little bit
- 3 - Moderately
- 4 - Quite a bit
- 5 – Extremely

These questions are about how you feel and how things have been with you **during the past 4 weeks**. For each question, please give the one answer that comes closest to the way you have been feeling.

How much of the time during the **past 4 weeks**...

|                                                                         | All of<br>the<br>time   | Most<br>of the<br>time  | A good<br>bit of<br>the<br>time | Some<br>of the<br>time  | A little<br>of the<br>time | None<br>of the<br>time  |
|-------------------------------------------------------------------------|-------------------------|-------------------------|---------------------------------|-------------------------|----------------------------|-------------------------|
| 23. Did you feel full of pep?                                           | <input type="radio"/> 1 | <input type="radio"/> 2 | <input type="radio"/> 3         | <input type="radio"/> 4 | <input type="radio"/> 5    | <input type="radio"/> 6 |
| 24. Have you been a very nervous person?                                | <input type="radio"/> 1 | <input type="radio"/> 2 | <input type="radio"/> 3         | <input type="radio"/> 4 | <input type="radio"/> 5    | <input type="radio"/> 6 |
| 25. Have you felt so down in the dumps that nothing could cheer you up? | <input type="radio"/> 1 | <input type="radio"/> 2 | <input type="radio"/> 3         | <input type="radio"/> 4 | <input type="radio"/> 5    | <input type="radio"/> 6 |
| 26. Have you felt calm and peaceful?                                    | <input type="radio"/> 1 | <input type="radio"/> 2 | <input type="radio"/> 3         | <input type="radio"/> 4 | <input type="radio"/> 5    | <input type="radio"/> 6 |
| 27. Did you have a lot of energy?                                       | <input type="radio"/> 1 | <input type="radio"/> 2 | <input type="radio"/> 3         | <input type="radio"/> 4 | <input type="radio"/> 5    | <input type="radio"/> 6 |
| 28. Have you felt downhearted and blue?                                 | <input type="radio"/> 1 | <input type="radio"/> 2 | <input type="radio"/> 3         | <input type="radio"/> 4 | <input type="radio"/> 5    | <input type="radio"/> 6 |
| 29. Did you feel worn out?                                              | <input type="radio"/> 1 | <input type="radio"/> 2 | <input type="radio"/> 3         | <input type="radio"/> 4 | <input type="radio"/> 5    | <input type="radio"/> 6 |
| 30. Have you been a happy person?                                       | <input type="radio"/> 1 | <input type="radio"/> 2 | <input type="radio"/> 3         | <input type="radio"/> 4 | <input type="radio"/> 5    | <input type="radio"/> 6 |
| 31. Did you feel tired?                                                 | <input type="radio"/> 1 | <input type="radio"/> 2 | <input type="radio"/> 3         | <input type="radio"/> 4 | <input type="radio"/> 5    | <input type="radio"/> 6 |

32. During the **past 4 weeks**, how much of the time has **your physical health or emotional problems** interfered with your social activities (like visiting with friends, relatives, etc.)?

- 1 - All of the time
- 2 - Most of the time
- 3 - Some of the time
- 4 - A little of the time
- 5 - None of the time

How TRUE or FALSE is **each** of the following statements for you.

|                                                          | Definitely true         | Mostly true             | Don't know              | Mostly false            | Definitely false        |
|----------------------------------------------------------|-------------------------|-------------------------|-------------------------|-------------------------|-------------------------|
| 33. I seem to get sick a little easier than other people | <input type="radio"/> 1 | <input type="radio"/> 2 | <input type="radio"/> 3 | <input type="radio"/> 4 | <input type="radio"/> 5 |
| 34. I am as healthy as anybody I know                    | <input type="radio"/> 1 | <input type="radio"/> 2 | <input type="radio"/> 3 | <input type="radio"/> 4 | <input type="radio"/> 5 |
| 35. I expect my health to get worse                      | <input type="radio"/> 1 | <input type="radio"/> 2 | <input type="radio"/> 3 | <input type="radio"/> 4 | <input type="radio"/> 5 |
| 36. My health is excellent                               | <input type="radio"/> 1 | <input type="radio"/> 2 | <input type="radio"/> 3 | <input type="radio"/> 4 | <input type="radio"/> 5 |

*This tool was developed at RAND Health as part of the Medical Outcomes Study.*

## Postoperative DCF

## Postoperative Delirium Following Total Joint Arthroplasties among South East Asians

Serial No: \_\_\_\_\_

Date of surgery: \_\_\_\_\_

Type of surgery: \_\_\_\_\_

Date of assessment: \_\_\_\_\_

# POD1

### CAM ASSESSMENT

1. Acute onset change in mental status from baseline?
  - a. Yes
  - b. No
  - c. Uncertain \_\_\_\_\_
2. Does the patient have difficulty focusing attention, is easily distracted, or has difficulty keeping track of what was being said?
  - a. Yes – mild form , fluctuating
  - b. Yes – marked form , fluctuating
  - c. Uncertain \_\_\_\_\_
  - d. No
3. Was the patient's thinking disorganized or incoherent, such as rambling or irrelevant conversation, unclear or illogical flow of ideas, or unpredictable switching from subject to subject?
  - a. Yes – mild form , fluctuating
  - b. Yes – marked form , fluctuating
  - c. Uncertain \_\_\_\_\_
  - d. No
4. How is the patient's overall level of consciousness?
  - a. Alert (normal)
  - b. Vigilant (hyperalert, overly sensitive to environmental stimuli, startled easily) , fluctuating
  - c. Lethargic (Drowsy, easily aroused) , fluctuating
  - d. Stupor (Difficult to arouse) , fluctuating
  - e. Coma (Unarousable) , fluctuating
  - f. Uncertain \_\_\_\_\_

### PAIN ASSESSMENT

VAS score at time of assessment (0 – 10): \_\_\_\_\_

### VISUAL/HEARING IMPAIRMENT

Visually impaired Hearing impaired If yes to above, hearing aids? 

### PERIOPERATIVE DETAILS

Tourniquet time: \_\_\_\_\_ minutes

Intra-articular injections:

(i) Tranexamic acid  Dosage:(ii) Morphine  Dosage:



|  |                                                       |
|--|-------------------------------------------------------|
|  | (iii) Marcaine <input type="checkbox"/> Dosage:       |
|  | (iv) Adrenaline <input type="checkbox"/> Dosage:      |
|  | (v) Ketorolac <input type="checkbox"/> Dosage:        |
|  | (vi) Triamcinolone <input type="checkbox"/> Dosage:   |
|  | (vii) Vancomycin <input type="checkbox"/> Dosage:     |
|  | (viii) Normal Saline <input type="checkbox"/> Dosage: |
|  | (ix) Others: _____                                    |

For peer review only

## Postoperative Delirium Following Total Joint Arthroplasties among South East Asians

Serial No: \_\_\_\_\_

# POD2

Date of surgery: \_\_\_\_\_

Type of surgery: \_\_\_\_\_

Date of assessment: \_\_\_\_\_

### CAM ASSESSMENT

5. Acute onset change in mental status from baseline?
  - a. Yes
  - b. No
  - c. Uncertain \_\_\_\_\_
6. Does the patient have difficulty focusing attention, is easily distracted, or has difficulty keeping track of what was being said?
  - a. Yes – mild form , fluctuating
  - b. Yes – marked form , fluctuating
  - c. Uncertain \_\_\_\_\_
  - d. No
7. Was the patient's thinking disorganized or incoherent, such as rambling or irrelevant conversation, unclear or illogical flow of ideas, or unpredictable switching from subject to subject?
  - a. Yes – mild form , fluctuating
  - b. Yes – marked form , fluctuating
  - c. Uncertain \_\_\_\_\_
  - d. No
8. How is the patient's overall level of consciousness?
  - a. Alert (normal)
  - b. Vigilant (hyperalert, overly sensitive to environmental stimuli, startled easily) , fluctuating
  - c. Lethargic (Drowsy, easily aroused) , fluctuating
  - d. Stupor (Difficult to arouse) , fluctuating
  - e. Coma (Unarousable) , fluctuating
  - f. Uncertain \_\_\_\_\_

### PAIN ASSESSMENT

VAS score at time of assessment (0 – 10): \_\_\_\_\_

## Postoperative Delirium Following Total Joint Arthroplasties among South East Asians

Serial No: \_\_\_\_\_

# POD3

Date of surgery: \_\_\_\_\_

Type of surgery: \_\_\_\_\_

Date of assessment: \_\_\_\_\_

### CAM ASSESSMENT

1. Acute onset change in mental status from baseline?
  - a. Yes
  - b. No
  - c. Uncertain \_\_\_\_\_
2. Does the patient have difficulty focusing attention, is easily distracted, or has difficulty keeping track of what was being said?
  - a. Yes – mild form , fluctuating
  - b. Yes – marked form , fluctuating
  - c. Uncertain \_\_\_\_\_
  - d. No
3. Was the patient's thinking disorganized or incoherent, such as rambling or irrelevant conversation, unclear or illogical flow of ideas, or unpredictable switching from subject to subject?
  - a. Yes – mild form , fluctuating
  - b. Yes – marked form , fluctuating
  - c. Uncertain \_\_\_\_\_
  - d. No
4. How is the patient's overall level of consciousness?
  - a. Alert (normal)
  - b. Vigilant (hyperalert, overly sensitive to environmental stimuli, startled easily) , fluctuating
  - c. Lethargic (Drowsy, easily aroused) , fluctuating
  - d. Stupor (Difficult to arouse) , fluctuating
  - e. Coma (Unarousable) , fluctuating
  - f. Uncertain \_\_\_\_\_

### PAIN ASSESSMENT

VAS score at time of assessment (0 – 10): \_\_\_\_\_

## Postoperative Delirium Following Total Joint Arthroplasties among South East Asians

Serial No:

\_\_\_\_\_

Date of surgery:

\_\_\_\_\_

Type of surgery:

\_\_\_\_\_

Date of assessment:

\_\_\_\_\_

# DAY OF DISCHARGE

### POSTOPERATIVE MORBIDITY SURGERY

| Morbidity Type     | Criteria                                                                                                                                                                                                                                                          | Tick if present<br>( ) |
|--------------------|-------------------------------------------------------------------------------------------------------------------------------------------------------------------------------------------------------------------------------------------------------------------|------------------------|
| Pulmonary          | De novo requirement for supplemental oxygen or other respiratory support (e.g. mechanical ventilation or CPAP)                                                                                                                                                    |                        |
| Infectious         | Currently on antibiotics or temperature > 38°C in the last 24h                                                                                                                                                                                                    |                        |
| Renal              | Presence of oliguria (< 500 ml/day), elevated serum creatinine (> 30% from preoperative value), or urinary catheter in place for a nonsurgical reason                                                                                                             |                        |
| Gastrointestinal   | Unable to tolerate an enteral diet (either by mouth or via a feeding tube) for any reason, including nausea, vomiting, and abdominal distension                                                                                                                   |                        |
| Cardiovascular     | Diagnostic tests or therapy within the last 24h for any of the following: de novo myocardial infarction or ischaemia, hypotension (requiring pharmacologic therapy or fluid therapy > 200ml/h), atrial or ventricular arrhythmias, or cardiogenic pulmonary edema |                        |
| Neurologic         | Presence of a de novo focal deficit, coma or confusion and delirium                                                                                                                                                                                               |                        |
| Wound complication | Wound dehiscence requiring surgical exploration or drainage of pus from the operation wound, with or without isolation of organisms                                                                                                                               |                        |
| Haematologic       | Requirement for any of the following within the last 24h: packed erythrocytes, platelets, fresh-frozen plasma, or cryoprecipitate                                                                                                                                 |                        |
| Pain               | Surgical wound pain significant enough to require parenteral opiates or regional analgesia                                                                                                                                                                        |                        |

CPAP: continuous positive airway pressure

STROBE Statement—Checklist of items that should be included in reports of *cohort studies*

|                              | Item No | Recommendation                                                                                                                                                                                    | Page Number |
|------------------------------|---------|---------------------------------------------------------------------------------------------------------------------------------------------------------------------------------------------------|-------------|
| <b>Title and abstract</b>    | 1       | (a) Indicate the study's design with a commonly used term in the title or the abstract                                                                                                            | 1           |
|                              |         | (b) Provide in the abstract an informative and balanced summary of what was done and what was found                                                                                               | 5           |
| <b>Introduction</b>          |         |                                                                                                                                                                                                   |             |
| Background/rationale         | 2       | Explain the scientific background and rationale for the investigation being reported                                                                                                              | 7           |
| Objectives                   | 3       | State specific objectives, including any prespecified hypotheses                                                                                                                                  | 7           |
| <b>Methods</b>               |         |                                                                                                                                                                                                   |             |
| Study design                 | 4       | Present key elements of study design early in the paper                                                                                                                                           | 8           |
| Setting                      | 5       | Describe the setting, locations, and relevant dates, including periods of recruitment, exposure, follow-up, and data collection                                                                   | 8-13        |
| Participants                 | 6       | (a) Give the eligibility criteria, and the sources and methods of selection of participants. Describe methods of follow-up                                                                        | 8           |
|                              |         | (b) For matched studies, give matching criteria and number of exposed and unexposed                                                                                                               | -           |
| Variables                    | 7       | Clearly define all outcomes, exposures, predictors, potential confounders, and effect modifiers. Give diagnostic criteria, if applicable                                                          | 8-13        |
| Data sources/<br>measurement | 8*      | For each variable of interest, give sources of data and details of methods of assessment (measurement). Describe comparability of assessment methods if there is more than one group              | 8-13        |
| Bias                         | 9       | Describe any efforts to address potential sources of bias                                                                                                                                         | 8           |
| Study size                   | 10      | Explain how the study size was arrived at                                                                                                                                                         | 13-14       |
| Quantitative variables       | 11      | Explain how quantitative variables were handled in the analyses. If applicable, describe which groupings were chosen and why                                                                      | 14          |
| Statistical methods          | 12      | (a) Describe all statistical methods, including those used to control for confounding                                                                                                             | 14          |
|                              |         | (b) Describe any methods used to examine subgroups and interactions                                                                                                                               | 14          |
|                              |         | (c) Explain how missing data were addressed                                                                                                                                                       | -           |
|                              |         | (d) If applicable, explain how loss to follow-up was addressed                                                                                                                                    | -           |
|                              |         | (e) Describe any sensitivity analyses                                                                                                                                                             | 14          |
| <b>Results</b>               |         |                                                                                                                                                                                                   |             |
| Participants                 | 13*     | (a) Report numbers of individuals at each stage of study—eg numbers potentially eligible, examined for eligibility, confirmed eligible, included in the study, completing follow-up, and analysed | -           |
|                              |         | (b) Give reasons for non-participation at each stage                                                                                                                                              | -           |
|                              |         | (c) Consider use of a flow diagram                                                                                                                                                                | -           |
| Descriptive data             | 14*     | (a) Give characteristics of study participants (eg demographic, clinical, social) and information on exposures and potential confounders                                                          | -           |
|                              |         | (b) Indicate number of participants with missing data for each variable of interest                                                                                                               | -           |
|                              |         | (c) Summarise follow-up time (eg, average and total amount)                                                                                                                                       | -           |
| Outcome data                 | 15*     | Report numbers of outcome events or summary measures over time                                                                                                                                    | -           |
| Main results                 | 16      | (a) Give unadjusted estimates and, if applicable, confounder-adjusted estimates and their precision (eg, 95% confidence interval). Make clear                                                     | -           |

|                          |    |                                                                                                                                                                            |    |
|--------------------------|----|----------------------------------------------------------------------------------------------------------------------------------------------------------------------------|----|
|                          |    | which confounders were adjusted for and why they were included                                                                                                             |    |
|                          |    | (b) Report category boundaries when continuous variables were categorized                                                                                                  | -  |
|                          |    | (c) If relevant, consider translating estimates of relative risk into absolute risk for a meaningful time period                                                           | -  |
| Other analyses           | 17 | Report other analyses done—eg analyses of subgroups and interactions, and sensitivity analyses                                                                             | -  |
| <b>Discussion</b>        |    |                                                                                                                                                                            |    |
| Key results              | 18 | Summarise key results with reference to study objectives                                                                                                                   | -  |
| Limitations              | 19 | Discuss limitations of the study, taking into account sources of potential bias or imprecision. Discuss both direction and magnitude of any potential bias                 | -  |
| Interpretation           | 20 | Give a cautious overall interpretation of results considering objectives, limitations, multiplicity of analyses, results from similar studies, and other relevant evidence | -  |
| Generalisability         | 21 | Discuss the generalisability (external validity) of the study results                                                                                                      | -  |
| <b>Other information</b> |    |                                                                                                                                                                            |    |
| Funding                  | 22 | Give the source of funding and the role of the funders for the present study and, if applicable, for the original study on which the present article is based              | 19 |

\*Give information separately for exposed and unexposed groups.

**Note:** An Explanation and Elaboration article discusses each checklist item and gives methodological background and published examples of transparent reporting. The STROBE checklist is best used in conjunction with this article (freely available on the Web sites of PLoS Medicine at <http://www.plosmedicine.org/>, Annals of Internal Medicine at <http://www.annals.org/>, and Epidemiology at <http://www.epidem.com/>). Information on the STROBE Initiative is available at <http://www.strobe-statement.org>.
