# Supplementary material for: Protocol for a single-centre prospective observational study of postoperative delirium following total joint arthroplasties among South East Asians
Source: PubMed Central journal article supplement — BMJ Open. 2018 Mar 6;8(3):e019426. doi: 10.1136/bmjopen-2017-019426 (PMC5855196; doi:10.1136/bmjopen-2017-019426), 2018-03-06
Supplement: bmjopen-2017-019426supp001.pdf [file bmjopen-2017-019426supp001.pdf]

| Item no. | Original version            | Adapted version                                              | Reasons                                                                      |
|----------|-----------------------------|--------------------------------------------------------------|------------------------------------------------------------------------------|
| 1        | "What is the season?"       | Without looking at your watch, what time is it?"             | There are no seasons in Singapore.                                           |
| 2a       | "What county are we in?";   | "What area/street are we in?";                               | Singapore is a city country; "Singapore" would only the only correct answer. |
| 2b       | "What town/city are we in?" | "Which part of Singapore (North/South/East/West) are we in?" | Singapore is a city country; "Singapore" would only the only correct answer. |
