# Supplementary material for: Protocol for a single-centre prospective observational study of postoperative delirium following total joint arthroplasties among South East Asians
Source: PubMed Central journal article supplement — BMJ Open. 2018 Mar 6;8(3):e019426. doi: 10.1136/bmjopen-2017-019426 (PMC5855196; doi:10.1136/bmjopen-2017-019426), 2018-03-06
Supplement: bmjopen-2017-019426supp002.pdf [file bmjopen-2017-019426supp002.pdf]

| Item no. | English version                                | Chinese version      | Malay version                                    |
|----------|------------------------------------------------|----------------------|--------------------------------------------------|
| 4        | Spell the word "WORLD" backwards               | 请把这句话倒说一遍 – “天上有月亮“  | Terbalikkan ejaan "DUNIA"                        |
| 7        | Repeat the following – "no ifs, ands, or buts" | 请清除的重复一遍 – “四十四只石狮子“ | Ulangan perkataan – "dahulu, kini dan selamanya" |
