# Supplementary material for: Protocol for a single-centre prospective observational study of postoperative delirium following total joint arthroplasties among South East Asians
Source: PubMed Central journal article supplement — BMJ Open. 2018 Mar 6;8(3):e019426. doi: 10.1136/bmjopen-2017-019426 (PMC5855196; doi:10.1136/bmjopen-2017-019426), 2018-03-06
Supplement: bmjopen-2017-019426supp003.pdf [file bmjopen-2017-019426supp003.pdf]

**Preoperative DCF**

**Postoperative Delirium Following Total Joint Arthroplasties among South East Asians**

Serial No: \_\_\_\_\_  
Date of preoperative assessment: \_\_\_\_\_

**DEMOGRAPHIC**

Age: \_\_\_\_\_  
Gender: Male  Female   
Race: Chinese  Malay  Indian  Others   
Language:  
English  Mandarin  Malay   
Others \_\_\_\_\_  
Highest education completed:  
\_\_\_\_\_  
Height: \_\_\_\_\_ m  
Weight: \_\_\_\_\_ kg  
BMI: \_\_\_\_\_

**OP DETAILS**

Surgeon: \_\_\_\_\_  
Type of Operation:  
TKR  THR   
Unilateral L  / R  OR Bilateral   
Primary  Revision   
Pre-operative Dx:  
\_\_\_\_\_  
\_\_\_\_\_  
\_\_\_\_\_  
Grip Strength: \_\_\_\_\_

**BACKGROUND MEDICAL CONDITION**

ASA: \_\_\_\_\_  
Charlson Comorbidity Index  
Overall score: \_\_\_\_\_

**CVS**

- Myocardial infarction
- Congestive heart failure
- Peripheral vascular disease

**CNS**

- Cerebrovascular disease
- Hemiplegia or paraplegia
- Dementia

**Respi**

- Chronic pulmonary disease

**MSK**

- Rheumatologic disease

**GI**

- Peptic ulcer disease
- Mild liver disease
- Moderate or severe liver disease

**Endocrine**

- Diabetes without chronic complications

Smoking   
Alcoholism   
Diabetes:  
OHGA  Insulin   
Latest HbA1c \_\_\_\_\_  
Chronic kidney disease   
Pre-existing dementia   
Other pre-existing neurological problems  
 CVA  
 Parkinson Disease  
 Depression  
 Anxiety  
 Schizophrenia and other delusional disorders  
Visual impairment   
Hearing impairment   
STOPBANG score \_\_\_\_\_  
**Chronic Medications**  
Benzodiazepine   
Statin   
Tramadol  Oxynorm   
Anti-depressants  
Tricyclics  SSRI  SNRI   
MOAI   
Anti-psychotics

| <input type="checkbox"/><br><b>Renal</b><br><input type="checkbox"/><br><input type="checkbox"/><br><b>Malignancy</b><br><input type="checkbox"/><br><input type="checkbox"/><br><input type="checkbox"/><br><b>Immunological</b><br><input type="checkbox"/>                                                                                                                                                                                                                                                                                                                                                                                                                                                                                                                                                                                                                                                                                                                                                                                                                                                                                                                                                                                                                                                                                                                                                                                                                                                                                                                                                                                                                                                                                                                                                                                                                            | Diabetes with chronic complications<br><br>Mild Renal disease<br>Moderate or severe renal disease<br><br>Any malignancy, including leukemia and lymphoma<br>Non-metastatic solid tumour<br>Metastatic solid tumor<br><br>AIDS/HIV | Haloperidol <input type="checkbox"/> Quetiapine <input type="checkbox"/><br>Olanzapine <input type="checkbox"/> Clozapine <input type="checkbox"/><br><br><b>Preoperative Laboratory Results</b><br>Hemoglobin _____<br>MCV _____<br>RDW _____<br>MCV _____<br>MCHC _____<br>Urea _____ |            |           |             |                          |                          |            |                          |                          |               |                          |                          |                                           |                          |                          |                                         |                          |                          |                   |                          |                          |              |                          |                          |                   |                          |                          |                                               |                          |                          |  |
|------------------------------------------------------------------------------------------------------------------------------------------------------------------------------------------------------------------------------------------------------------------------------------------------------------------------------------------------------------------------------------------------------------------------------------------------------------------------------------------------------------------------------------------------------------------------------------------------------------------------------------------------------------------------------------------------------------------------------------------------------------------------------------------------------------------------------------------------------------------------------------------------------------------------------------------------------------------------------------------------------------------------------------------------------------------------------------------------------------------------------------------------------------------------------------------------------------------------------------------------------------------------------------------------------------------------------------------------------------------------------------------------------------------------------------------------------------------------------------------------------------------------------------------------------------------------------------------------------------------------------------------------------------------------------------------------------------------------------------------------------------------------------------------------------------------------------------------------------------------------------------------|-----------------------------------------------------------------------------------------------------------------------------------------------------------------------------------------------------------------------------------|-----------------------------------------------------------------------------------------------------------------------------------------------------------------------------------------------------------------------------------------------------------------------------------------|------------|-----------|-------------|--------------------------|--------------------------|------------|--------------------------|--------------------------|---------------|--------------------------|--------------------------|-------------------------------------------|--------------------------|--------------------------|-----------------------------------------|--------------------------|--------------------------|-------------------|--------------------------|--------------------------|--------------|--------------------------|--------------------------|-------------------|--------------------------|--------------------------|-----------------------------------------------|--------------------------|--------------------------|--|
| <b>IntraOp</b><br><br>ANA Type: _____<br><br><table style="width: 100%; border-collapse: collapse;"> <thead> <tr> <th style="width: 80%;"></th> <th style="width: 10%; text-align: center;"><b>Yes</b></th> <th style="width: 10%; text-align: center;"><b>No</b></th> </tr> </thead> <tbody> <tr> <td>Fem N block</td> <td style="text-align: center;"><input type="checkbox"/></td> <td style="text-align: center;"><input type="checkbox"/></td> </tr> <tr> <td>Benzo Use:</td> <td style="text-align: center;"><input type="checkbox"/></td> <td style="text-align: center;"><input type="checkbox"/></td> </tr> <tr> <td>Atropine Use:</td> <td style="text-align: center;"><input type="checkbox"/></td> <td style="text-align: center;"><input type="checkbox"/></td> </tr> <tr> <td>Opioid use<br/><b>If yes , dose: _____</b></td> <td style="text-align: center;"><input type="checkbox"/></td> <td style="text-align: center;"><input type="checkbox"/></td> </tr> <tr> <td>Dexa use<br/><b>If yes , dose: _____</b></td> <td style="text-align: center;"><input type="checkbox"/></td> <td style="text-align: center;"><input type="checkbox"/></td> </tr> <tr> <td>Promethazine use:</td> <td style="text-align: center;"><input type="checkbox"/></td> <td style="text-align: center;"><input type="checkbox"/></td> </tr> <tr> <td>Ondansetron:</td> <td style="text-align: center;"><input type="checkbox"/></td> <td style="text-align: center;"><input type="checkbox"/></td> </tr> <tr> <td>Blood Transfusion</td> <td style="text-align: center;"><input type="checkbox"/></td> <td style="text-align: center;"><input type="checkbox"/></td> </tr> <tr> <td>Hypotension<br/><b>If yes, duration: _____</b></td> <td style="text-align: center;"><input type="checkbox"/></td> <td style="text-align: center;"><input type="checkbox"/></td> </tr> </tbody> </table> |                                                                                                                                                                                                                                   |                                                                                                                                                                                                                                                                                         | <b>Yes</b> | <b>No</b> | Fem N block | <input type="checkbox"/> | <input type="checkbox"/> | Benzo Use: | <input type="checkbox"/> | <input type="checkbox"/> | Atropine Use: | <input type="checkbox"/> | <input type="checkbox"/> | Opioid use<br><b>If yes , dose: _____</b> | <input type="checkbox"/> | <input type="checkbox"/> | Dexa use<br><b>If yes , dose: _____</b> | <input type="checkbox"/> | <input type="checkbox"/> | Promethazine use: | <input type="checkbox"/> | <input type="checkbox"/> | Ondansetron: | <input type="checkbox"/> | <input type="checkbox"/> | Blood Transfusion | <input type="checkbox"/> | <input type="checkbox"/> | Hypotension<br><b>If yes, duration: _____</b> | <input type="checkbox"/> | <input type="checkbox"/> |  |
|                                                                                                                                                                                                                                                                                                                                                                                                                                                                                                                                                                                                                                                                                                                                                                                                                                                                                                                                                                                                                                                                                                                                                                                                                                                                                                                                                                                                                                                                                                                                                                                                                                                                                                                                                                                                                                                                                          | <b>Yes</b>                                                                                                                                                                                                                        | <b>No</b>                                                                                                                                                                                                                                                                               |            |           |             |                          |                          |            |                          |                          |               |                          |                          |                                           |                          |                          |                                         |                          |                          |                   |                          |                          |              |                          |                          |                   |                          |                          |                                               |                          |                          |  |
| Fem N block                                                                                                                                                                                                                                                                                                                                                                                                                                                                                                                                                                                                                                                                                                                                                                                                                                                                                                                                                                                                                                                                                                                                                                                                                                                                                                                                                                                                                                                                                                                                                                                                                                                                                                                                                                                                                                                                              | <input type="checkbox"/>                                                                                                                                                                                                          | <input type="checkbox"/>                                                                                                                                                                                                                                                                |            |           |             |                          |                          |            |                          |                          |               |                          |                          |                                           |                          |                          |                                         |                          |                          |                   |                          |                          |              |                          |                          |                   |                          |                          |                                               |                          |                          |  |
| Benzo Use:                                                                                                                                                                                                                                                                                                                                                                                                                                                                                                                                                                                                                                                                                                                                                                                                                                                                                                                                                                                                                                                                                                                                                                                                                                                                                                                                                                                                                                                                                                                                                                                                                                                                                                                                                                                                                                                                               | <input type="checkbox"/>                                                                                                                                                                                                          | <input type="checkbox"/>                                                                                                                                                                                                                                                                |            |           |             |                          |                          |            |                          |                          |               |                          |                          |                                           |                          |                          |                                         |                          |                          |                   |                          |                          |              |                          |                          |                   |                          |                          |                                               |                          |                          |  |
| Atropine Use:                                                                                                                                                                                                                                                                                                                                                                                                                                                                                                                                                                                                                                                                                                                                                                                                                                                                                                                                                                                                                                                                                                                                                                                                                                                                                                                                                                                                                                                                                                                                                                                                                                                                                                                                                                                                                                                                            | <input type="checkbox"/>                                                                                                                                                                                                          | <input type="checkbox"/>                                                                                                                                                                                                                                                                |            |           |             |                          |                          |            |                          |                          |               |                          |                          |                                           |                          |                          |                                         |                          |                          |                   |                          |                          |              |                          |                          |                   |                          |                          |                                               |                          |                          |  |
| Opioid use<br><b>If yes , dose: _____</b>                                                                                                                                                                                                                                                                                                                                                                                                                                                                                                                                                                                                                                                                                                                                                                                                                                                                                                                                                                                                                                                                                                                                                                                                                                                                                                                                                                                                                                                                                                                                                                                                                                                                                                                                                                                                                                                | <input type="checkbox"/>                                                                                                                                                                                                          | <input type="checkbox"/>                                                                                                                                                                                                                                                                |            |           |             |                          |                          |            |                          |                          |               |                          |                          |                                           |                          |                          |                                         |                          |                          |                   |                          |                          |              |                          |                          |                   |                          |                          |                                               |                          |                          |  |
| Dexa use<br><b>If yes , dose: _____</b>                                                                                                                                                                                                                                                                                                                                                                                                                                                                                                                                                                                                                                                                                                                                                                                                                                                                                                                                                                                                                                                                                                                                                                                                                                                                                                                                                                                                                                                                                                                                                                                                                                                                                                                                                                                                                                                  | <input type="checkbox"/>                                                                                                                                                                                                          | <input type="checkbox"/>                                                                                                                                                                                                                                                                |            |           |             |                          |                          |            |                          |                          |               |                          |                          |                                           |                          |                          |                                         |                          |                          |                   |                          |                          |              |                          |                          |                   |                          |                          |                                               |                          |                          |  |
| Promethazine use:                                                                                                                                                                                                                                                                                                                                                                                                                                                                                                                                                                                                                                                                                                                                                                                                                                                                                                                                                                                                                                                                                                                                                                                                                                                                                                                                                                                                                                                                                                                                                                                                                                                                                                                                                                                                                                                                        | <input type="checkbox"/>                                                                                                                                                                                                          | <input type="checkbox"/>                                                                                                                                                                                                                                                                |            |           |             |                          |                          |            |                          |                          |               |                          |                          |                                           |                          |                          |                                         |                          |                          |                   |                          |                          |              |                          |                          |                   |                          |                          |                                               |                          |                          |  |
| Ondansetron:                                                                                                                                                                                                                                                                                                                                                                                                                                                                                                                                                                                                                                                                                                                                                                                                                                                                                                                                                                                                                                                                                                                                                                                                                                                                                                                                                                                                                                                                                                                                                                                                                                                                                                                                                                                                                                                                             | <input type="checkbox"/>                                                                                                                                                                                                          | <input type="checkbox"/>                                                                                                                                                                                                                                                                |            |           |             |                          |                          |            |                          |                          |               |                          |                          |                                           |                          |                          |                                         |                          |                          |                   |                          |                          |              |                          |                          |                   |                          |                          |                                               |                          |                          |  |
| Blood Transfusion                                                                                                                                                                                                                                                                                                                                                                                                                                                                                                                                                                                                                                                                                                                                                                                                                                                                                                                                                                                                                                                                                                                                                                                                                                                                                                                                                                                                                                                                                                                                                                                                                                                                                                                                                                                                                                                                        | <input type="checkbox"/>                                                                                                                                                                                                          | <input type="checkbox"/>                                                                                                                                                                                                                                                                |            |           |             |                          |                          |            |                          |                          |               |                          |                          |                                           |                          |                          |                                         |                          |                          |                   |                          |                          |              |                          |                          |                   |                          |                          |                                               |                          |                          |  |
| Hypotension<br><b>If yes, duration: _____</b>                                                                                                                                                                                                                                                                                                                                                                                                                                                                                                                                                                                                                                                                                                                                                                                                                                                                                                                                                                                                                                                                                                                                                                                                                                                                                                                                                                                                                                                                                                                                                                                                                                                                                                                                                                                                                                            | <input type="checkbox"/>                                                                                                                                                                                                          | <input type="checkbox"/>                                                                                                                                                                                                                                                                |            |           |             |                          |                          |            |                          |                          |               |                          |                          |                                           |                          |                          |                                         |                          |                          |                   |                          |                          |              |                          |                          |                   |                          |                          |                                               |                          |                          |  |

**BASELINE CAM**

1. Acute onset change in mental status from baseline?
  - a. Yes
  - b. No
  - c. Uncertain \_\_\_\_\_
2. Does the patient have difficulty focusing attention, is easily distracted, or has difficulty keeping track of what was being said?
  - a. Yes – mild form , fluctuating
  - b. Yes – marked form , fluctuating
  - c. Uncertain \_\_\_\_\_
  - d. No
3. Was the patient’s thinking disorganized or incoherent, such as rambling or irrelevant conversation, unclear or illogical flow of ideas, or unpredictable switching from subject to subject?
  - a. Yes – mild form , fluctuating

- b. Yes – marked form , fluctuating
  - c. Uncertain \_\_\_\_\_
  - d. No
4. How is the patient’s overall level of consciousness?
- a. Alert (normal)
  - b. Vigilant (hyperalert, overly sensitive to environmental stimuli, startled easily) , fluctuating
  - c. Lethargic (Drowsy, easily aroused) , fluctuating
  - d. Stupor (Difficult to arouse) , fluctuating
  - e. Coma (Unarousable) , fluctuating
  - f. Uncertain \_\_\_\_\_

**BASELINE MINI MENTAL STATE EXAMINATION**

Total score \_\_\_\_\_

Level of consciousness

Alert  Drowsy  Stupor  Coma

|                        | Question                                                                                                                                                                                                                                                        | Score                           |
|------------------------|-----------------------------------------------------------------------------------------------------------------------------------------------------------------------------------------------------------------------------------------------------------------|---------------------------------|
| 1                      | What is the <ul style="list-style-type: none"> <li>• year</li> <li>• month</li> <li>• day of the week</li> <li>• date</li> <li>• current time now (without looking at your watch)?</li> </ul>                                                                   | / 5                             |
| 2                      | What country are we in?<br>What area/street are we in?<br>Which part of Singapore is this place (North, south, east, west or central)<br>Which hospital are we in?<br>Which floor?                                                                              | / 5                             |
| 3                      | Show the objects: ball, flag, tree<br><br>Name 3 objects: 1 second to say each. Then ask the patient all 3 after you have said them. Give 1 point for each correct answer. Then repeat them until he/she learns all 3. Count trials and record.<br>Trials _____ | / 3                             |
| 4                      | Serial 7’s. 1 point for each correct answer. Stop after 5 answers.<br>Alternatively spell “world” backward.                                                                                                                                                     | / 5                             |
| 5                      | Ask for the 3 objects repeated above. Give 1 point for each correct answer.                                                                                                                                                                                     | / 3                             |
| 6                      | Name a pencil and watch.<br>Repeat the following “No ifs, ands, or buts”<br>Follow a 3-stage command:<br>“Take a paper in your hand, fold it in half, and put it on the floor.”<br>Read and obey the following:                                                 | / 2<br>/ 1<br>/ 3<br>/ 1<br>/ 1 |
| <b>CLOSE YOUR EYES</b> |                                                                                                                                                                                                                                                                 |                                 |

|  |                                                                                                                                                                                                                                                                                                                                                          |     |  |
|--|----------------------------------------------------------------------------------------------------------------------------------------------------------------------------------------------------------------------------------------------------------------------------------------------------------------------------------------------------------|-----|--|
|  | <p>Write a sentence.</p> <p>Copy the design shown</p> 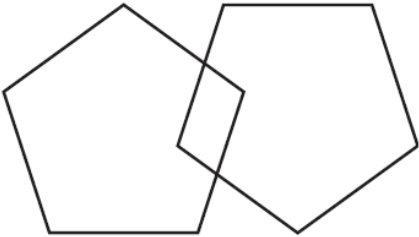 The image shows two identical regular pentagons. The left pentagon is positioned such that its right side overlaps with the left side of the right pentagon. The overlapping area is a smaller pentagonal shape. | / 1 |  |
|  |                                                                                                                                                                                                                                                                                                                                                          | / 1 |  |
