# Supplementary material for: Protocol for a single-centre prospective observational study of postoperative delirium following total joint arthroplasties among South East Asians
Source: PubMed Central journal article supplement — BMJ Open. 2018 Mar 6;8(3):e019426. doi: 10.1136/bmjopen-2017-019426 (PMC5855196; doi:10.1136/bmjopen-2017-019426), 2018-03-06
Supplement: bmjopen-2017-019426supp004.pdf [file bmjopen-2017-019426supp004.pdf]

## Postoperative Morbidity Survey

| Morbidity type   | Criteria                                                                                                                                                                                                                                                                                                      | Source of data      |
|------------------|---------------------------------------------------------------------------------------------------------------------------------------------------------------------------------------------------------------------------------------------------------------------------------------------------------------|---------------------|
| Pulmonary        | Has the patient developed a new requirement for oxygen or respiratory support.                                                                                                                                                                                                                                | Patient observation |
|                  |                                                                                                                                                                                                                                                                                                               | Treatment chart     |
| Infectious       | Currently on antibiotics and/or has had a temperature of >38°C in the last 24 hr.                                                                                                                                                                                                                             | Treatment chart     |
|                  |                                                                                                                                                                                                                                                                                                               | Observation chart   |
| Renal            | Presence of oliguria <500 mL/24 hr; increased serum creatinine (>30% from preoperative level); urinary catheter in situ.                                                                                                                                                                                      | Fluid balance chart |
|                  |                                                                                                                                                                                                                                                                                                               | Biochemistry result |
|                  |                                                                                                                                                                                                                                                                                                               | Patient observation |
| Gastrointestinal | Unable to tolerate an enteral diet for any reason including nausea, vomiting, and abdominal distension (use of antiemetic).                                                                                                                                                                                   | Patient questioning |
|                  |                                                                                                                                                                                                                                                                                                               | Fluid balance chart |
|                  |                                                                                                                                                                                                                                                                                                               | Treatment chart     |
| Cardiovascular   | Diagnostic tests or therapy within the last 24 hr for any of the following: new myocardial infarction or ischemia, hypotension (requiring fluid therapy >200 mL/hr or pharmacological therapy), atrial or ventricular arrhythmias, cardiogenic pulmonary edema, thrombotic event (requiring anticoagulation). | Treatment chart     |
|                  |                                                                                                                                                                                                                                                                                                               | Note review         |
| Neurological     | New focal neurological deficit, confusion, delirium, or coma.                                                                                                                                                                                                                                                 | Note review         |
|                  |                                                                                                                                                                                                                                                                                                               | Patient questioning |
| Hematological    | Requirement for any of the following within the last 24 hr: packed erythrocytes, platelets, fresh-frozen plasma, or cryoprecipitate.                                                                                                                                                                          | Treatment chart     |
|                  |                                                                                                                                                                                                                                                                                                               | Fluid balance chart |
| Wound            | Wound dehiscence requiring surgical exploration or drainage of pus from the operation wound with or without isolation of organisms.                                                                                                                                                                           | Note review         |
|                  |                                                                                                                                                                                                                                                                                                               | Pathology result    |
| Pain             | New postoperative pain significant enough to require parenteral opioids or regional analgesia.                                                                                                                                                                                                                | Treatment chart     |
|                  |                                                                                                                                                                                                                                                                                                               | Patient questioning |
