# Supplementary material for: Protocol for a single-centre prospective observational study of postoperative delirium following total joint arthroplasties among South East Asians
Source: PubMed Central journal article supplement — BMJ Open. 2018 Mar 6;8(3):e019426. doi: 10.1136/bmjopen-2017-019426 (PMC5855196; doi:10.1136/bmjopen-2017-019426), 2018-03-06
Supplement: bmjopen-2017-019426supp006.pdf [file bmjopen-2017-019426supp006.pdf]

## Postoperative DCF

### Postoperative Delirium Following Total Joint Arthroplasties among South East Asians

Serial No: \_\_\_\_\_

Date of surgery: \_\_\_\_\_

Type of surgery: \_\_\_\_\_

Date of assessment: \_\_\_\_\_

# POD1

#### CAM ASSESSMENT

1. Acute onset change in mental status from baseline?
  - a. Yes
  - b. No
  - c. Uncertain \_\_\_\_\_
2. Does the patient have difficulty focusing attention, is easily distracted, or has difficulty keeping track of what was being said?
  - a. Yes – mild form , fluctuating
  - b. Yes – marked form , fluctuating
  - c. Uncertain \_\_\_\_\_
  - d. No
3. Was the patient's thinking disorganized or incoherent, such as rambling or irrelevant conversation, unclear or illogical flow of ideas, or unpredictable switching from subject to subject?
  - a. Yes – mild form , fluctuating
  - b. Yes – marked form , fluctuating
  - c. Uncertain \_\_\_\_\_
  - d. No
4. How is the patient's overall level of consciousness?
  - a. Alert (normal)
  - b. Vigilant (hyperalert, overly sensitive to environmental stimuli, startled easily) , fluctuating
  - c. Lethargic (Drowsy, easily aroused) , fluctuating
  - d. Stupor (Difficult to arouse) , fluctuating
  - e. Coma (Unarousable) , fluctuating
  - f. Uncertain \_\_\_\_\_

#### PAIN ASSESSMENT

VAS score at time of assessment (0 – 10): \_\_\_\_\_

#### VISUAL/HEARING IMPAIRMENT

Visually impaired

Hearing impaired

If yes to above, hearing aids?

#### PERIOPERATIVE DETAILS

Tourniquet time: \_\_\_\_\_ minutes

Intra-articular injections:

(i) Tranexamic acid  Dosage:

(ii) Morphine  Dosage:

|  |                                                                                                                                                                                                                                                                                                                                                                                 |
|--|---------------------------------------------------------------------------------------------------------------------------------------------------------------------------------------------------------------------------------------------------------------------------------------------------------------------------------------------------------------------------------|
|  | <p>(iii) Marcaine <input type="checkbox"/> Dosage:</p> <p>(iv) Adrenaline <input type="checkbox"/> Dosage:</p> <p>(v) Ketorolac <input type="checkbox"/> Dosage:</p> <p>(vi) Triamcinolone <input type="checkbox"/> Dosage:</p> <p>(vii) Vancomycin <input type="checkbox"/> Dosage:</p> <p>(viii) Normal Saline <input type="checkbox"/> Dosage:</p> <p>(ix) Others: _____</p> |
|--|---------------------------------------------------------------------------------------------------------------------------------------------------------------------------------------------------------------------------------------------------------------------------------------------------------------------------------------------------------------------------------|

## Postoperative Delirium Following Total Joint Arthroplasties among South East Asians

Serial No: \_\_\_\_\_

Date of surgery: \_\_\_\_\_

Type of surgery: \_\_\_\_\_

Date of assessment: \_\_\_\_\_

# POD2

### CAM ASSESSMENT

5. Acute onset change in mental status from baseline?
  - a. Yes
  - b. No
  - c. Uncertain \_\_\_\_\_
6. Does the patient have difficulty focusing attention, is easily distracted, or has difficulty keeping track of what was being said?
  - a. Yes – mild form , fluctuating
  - b. Yes – marked form , fluctuating
  - c. Uncertain \_\_\_\_\_
  - d. No
7. Was the patient's thinking disorganized or incoherent, such as rambling or irrelevant conversation, unclear or illogical flow of ideas, or unpredictable switching from subject to subject?
  - a. Yes – mild form , fluctuating
  - b. Yes – marked form , fluctuating
  - c. Uncertain \_\_\_\_\_
  - d. No
8. How is the patient's overall level of consciousness?
  - a. Alert (normal)
  - b. Vigilant (hyperalert, overly sensitive to environmental stimuli, startled easily) , fluctuating
  - c. Lethargic (Drowsy, easily aroused) , fluctuating
  - d. Stupor (Difficult to arouse) , fluctuating
  - e. Coma (Unarousable) , fluctuating
  - f. Uncertain \_\_\_\_\_

### PAIN ASSESSMENT

VAS score at time of assessment (0 – 10): \_\_\_\_\_

## Postoperative Delirium Following Total Joint Arthroplasties among South East Asians

Serial No: \_\_\_\_\_

Date of surgery: \_\_\_\_\_

Type of surgery: \_\_\_\_\_

Date of assessment: \_\_\_\_\_

# POD3

### CAM ASSESSMENT

1. Acute onset change in mental status from baseline?
  - a. Yes
  - b. No
  - c. Uncertain \_\_\_\_\_
2. Does the patient have difficulty focusing attention, is easily distracted, or has difficulty keeping track of what was being said?
  - a. Yes – mild form , fluctuating
  - b. Yes – marked form , fluctuating
  - c. Uncertain \_\_\_\_\_
  - d. No
3. Was the patient's thinking disorganized or incoherent, such as rambling or irrelevant conversation, unclear or illogical flow of ideas, or unpredictable switching from subject to subject?
  - a. Yes – mild form , fluctuating
  - b. Yes – marked form , fluctuating
  - c. Uncertain \_\_\_\_\_
  - d. No
4. How is the patient's overall level of consciousness?
  - a. Alert (normal)
  - b. Vigilant (hyperalert, overly sensitive to environmental stimuli, startled easily) , fluctuating
  - c. Lethargic (Drowsy, easily aroused) , fluctuating
  - d. Stupor (Difficult to arouse) , fluctuating
  - e. Coma (Unarousable) , fluctuating
  - f. Uncertain \_\_\_\_\_

### PAIN ASSESSMENT

VAS score at time of assessment (0 – 10): \_\_\_\_\_

**Postoperative Delirium Following Total Joint Arthroplasties among South East Asians**

|                                                                                                                           |                                                  |
|---------------------------------------------------------------------------------------------------------------------------|--------------------------------------------------|
| Serial No:<br>_____<br><br>Date of surgery:<br>_____<br><br>Type of surgery:<br>_____<br><br>Date of assessment:<br>_____ | <h1 style="margin: 0;">DAY OF<br/>DISCHARGE</h1> |
|---------------------------------------------------------------------------------------------------------------------------|--------------------------------------------------|

| <b>POSTOPERATIVE MORBIDITY SURGERY</b> |                                                                                                                                                                                                                                                                   |                                |
|----------------------------------------|-------------------------------------------------------------------------------------------------------------------------------------------------------------------------------------------------------------------------------------------------------------------|--------------------------------|
| <b>Morbidity Type</b>                  | <b>Criteria</b>                                                                                                                                                                                                                                                   | <b>Tick if present<br/>( )</b> |
| Pulmonary                              | De novo requirement for supplemental oxygen or other respiratory support (e.g. mechanical ventilation or CPAP)                                                                                                                                                    |                                |
| Infectious                             | Currently on antibiotics or temperature > 38°C in the last 24h                                                                                                                                                                                                    |                                |
| Renal                                  | Presence of oliguria (< 500 ml/day), elevated serum creatinine (> 30% from preoperative value), or urinary catheter in place for a nonsurgical reason                                                                                                             |                                |
| Gastrointestinal                       | Unable to tolerate an enteral diet (either by mouth or via a feeding tube) for any reason, including nausea, vomiting, and abdominal distension                                                                                                                   |                                |
| Cardiovascular                         | Diagnostic tests or therapy within the last 24h for any of the following: de novo myocardial infarction or ischaemia, hypotension (requiring pharmacologic therapy or fluid therapy > 200ml/h), atrial or ventricular arrhythmias, or cardiogenic pulmonary edema |                                |
| Neurologic                             | Presence of a de novo focal deficit, coma or confusion and delirium                                                                                                                                                                                               |                                |
| Wound complication                     | Wound dehiscence requiring surgical exploration or drainage of pus from the operation wound, with or without isolation of organisms                                                                                                                               |                                |
| Haematologic                           | Requirement for any of the following within the last 24h: packed erythrocytes, platelets, fresh-frozen plasma, or cryoprecipitate                                                                                                                                 |                                |
| Pain                                   | Surgical wound pain significant enough to require parenteral opiates or regional analgesia                                                                                                                                                                        |                                |

CPAP: continuous positive airway pressure
